# Supplementary material for: Cortical waves mediate the cellular response to electric fields
Source: eLife. 2022 Mar 23;11:e73198. doi: 10.7554/eLife.73198 (PMC8942472; doi:10.7554/eLife.73198)
Supplement: Figure 2—source data 1. — Related to Figure 2b. [file elife-73198-fig2-data1.xlsx]

## Sheet: Sheet1
Figure 2 - Source Data 1
Figure 2b: LimE occupancy normalized by cell area
Note: Each column represents an independent replicate
Control									With 20V/cm EF
Time (min)	Exp. 1	Exp. 2	Exp.3	Exp.4	Exp.5	Average	Std		Time (min)	Exp. 1	Exp. 2	Exp.3	Exp.4	Average	Std
0	0.196436	0.128821	0.122168	0.0552913	0.0856168	0.117667	0.0530733		0	0.222086	0.138245	NaN	0.248744	0.203025	0.0576631
0.166667	0.189818	0.136357	0.125433	0.0548352	0.0803903	0.117367	0.0523266		0.166667	0.218906	0.141819	NaN	0.238863	0.199863	0.0512481
0.333333	0.186102	0.144203	0.128922	0.0553101	0.0744374	0.117795	0.0530831		0.333333	0.218126	0.146826	NaN	0.226216	0.197056	0.0436883
0.5	0.183583	0.141652	0.130843	0.054688	0.0664484	0.115443	0.0539877		0.5	0.218139	0.153851	NaN	0.213972	0.195321	0.0359742
0.666667	0.182267	0.159784	0.134565	0.0530123	0.0622611	0.118378	0.058052		0.666667	0.221187	0.155307	NaN	0.202226	0.192907	0.0339146
0.833333	0.180711	0.175736	0.139377	0.0529973	0.0567633	0.121117	0.0625497		0.833333	0.214243	0.159968	NaN	0.197037	0.190416	0.0277363
1	0.182238	0.185162	0.147284	0.053297	0.050299	0.123656	0.067277		1	0.205687	0.165561	NaN	0.1958	0.189016	0.0209058
1.16667	0.188185	0.195198	0.15299	0.0549763	0.0454714	0.127364	0.0722905		1.16667	0.198782	0.171484	NaN	0.204637	0.191634	0.0176944
1.33333	0.197801	0.202356	0.164015	0.0576679	0.0405142	0.132471	0.0777795		1.33333	0.187225	0.175003	NaN	0.21692	0.193049	0.021557
1.5	0.206318	0.212047	0.174599	0.0583153	0.0347813	0.137212	0.0843956		1.5	0.178076	0.176149	NaN	0.233104	0.195776	0.0323409
1.66667	0.212204	0.217629	0.179489	0.0584674	0.0389662	0.141351	0.0860892		1.66667	0.170108	0.172331	NaN	0.250436	0.197625	0.0457492
1.83333	0.21991	0.21056	0.181081	0.0592968	0.0408846	0.142346	0.0856757		1.83333	0.161898	0.170016	NaN	0.262015	0.197976	0.0556073
2	0.226332	0.207669	0.183925	0.0605235	0.0470396	0.145098	0.0848381		2	0.1593	0.166825	NaN	0.269158	0.198427	0.0613696
2.16667	0.232697	0.197853	0.181193	0.0616288	0.0538482	0.145444	0.0822384		2.16667	0.157117	0.163883	NaN	0.271369	0.197456	0.0640997
2.33333	0.232215	0.188132	0.175191	0.062064	0.0601834	0.143557	0.0781667		2.33333	0.156139	0.161443	NaN	0.268373	0.195318	0.0633229
2.5	0.232034	0.18094	0.166774	0.0634663	0.0677217	0.142187	0.0740284		2.5	0.158361	0.161424	NaN	0.263312	0.194366	0.0597288
2.66667	0.230301	0.165946	0.155806	0.0658523	0.0750691	0.138595	0.0685223		2.66667	0.159745	0.162091	NaN	0.252387	0.191408	0.052823
2.83333	0.227708	0.149692	0.149164	0.0712142	0.0736472	0.134285	0.0648874		2.83333	0.158121	0.165069	NaN	0.241332	0.188174	0.0461669
3	0.221652	0.144125	0.141474	0.0738561	0.0740755	0.131037	0.0612488		3	0.155404	0.167827	NaN	0.236284	0.186505	0.0435555
3.16667	0.217219	0.133547	0.132905	0.0762153	0.0704526	0.126068	0.0591388		3.16667	0.151302	0.168194	NaN	0.230593	0.183363	0.0417652
3.33333	0.21124	0.129227	0.127403	0.0767468	0.071306	0.123185	0.0562493		3.33333	0.152133	0.168341	NaN	0.22831	0.182928	0.0401288
3.5	0.20899	0.131683	0.12515	0.0789721	0.0730227	0.123564	0.0545641		3.5	0.15081	0.167898	NaN	0.229348	0.182685	0.0413045
3.66667	0.206774	0.131637	0.128141	0.077981	0.0740352	0.123714	0.0537143		3.66667	0.149121	0.165494	NaN	0.227099	0.180571	0.0411172
3.83333	0.203828	0.141975	0.138418	0.0770547	0.0764522	0.127546	0.0531633		3.83333	0.151037	0.164376	NaN	0.225609	0.180341	0.0397671
4	0.206582	0.152344	0.143678	0.0736146	0.0818335	0.13161	0.0548578		4	0.154731	0.16876	NaN	0.219704	0.181065	0.0341901
4.16667	0.210005	0.16257	0.15727	0.0702798	0.0931867	0.138662	0.0564618		4.16667	0.158016	0.17662	NaN	0.20951	0.181382	0.0260753
4.33333	0.213036	0.173599	0.172025	0.064663	0.104343	0.145533	0.0597553		4.33333	0.163982	0.185793	NaN	0.202511	0.184096	0.0193205
4.5	0.216331	0.201438	0.180656	0.0584007	0.107636	0.152892	0.0673217		4.5	0.169715	0.195323	NaN	0.192577	0.185872	0.0140595
4.66667	0.218023	0.227307	0.187016	0.0505785	0.106531	0.157891	0.0765449		4.66667	0.177391	0.203691	NaN	0.180719	0.187267	0.0143204
4.83333	0.213769	0.199165	0.189677	0.0430824	0.106308	0.1504	0.0731396		4.83333	0.182444	0.210318	NaN	0.174461	0.189074	0.0188257
5	0.212819	0.186672	0.185058	0.0349766	0.107613	0.145428	0.0732163		5	0.184123	0.215724	0.225427	0.171369	0.199161	0.0255784
5.16667	0.208533	0.194446	0.183721	0.0269176	0.111755	0.145075	0.0758771		5.16667	0.179718	0.216063	0.22696	0.178295	0.200259	0.024947
5.33333	0.203517	0.194825	0.173556	0.0210341	0.114124	0.141411	0.0757936		5.33333	0.178471	0.213704	0.236051	0.187373	0.2039	0.026138
5.5	0.199097	0.209823	0.161388	0.0152514	0.115875	0.140287	0.0790079		5.5	0.179986	0.213916	0.243654	0.200513	0.209517	0.0266947
5.66667	0.194311	0.191129	0.152711	0.0112416	0.120708	0.13402	0.0749959		5.66667	0.175839	0.212943	0.252204	0.220914	0.215475	0.0313901
5.83333	0.190496	0.176773	0.146724	0.00805058	0.127619	0.129932	0.0724645		5.83333	0.168353	0.211796	0.260902	0.249178	0.222557	0.0417649
6	0.190514	0.184469	0.143037	0.00639584	0.128133	0.13051	0.0742951		6	0.166275	0.214738	0.274136	0.282536	0.234421	0.0545392
6.16667	0.189015	0.185338	0.13795	0.00477275	0.123723	0.12816	0.074687		6.16667	0.154862	0.217017	0.291729	0.317921	0.245382	0.0739557
6.33333	0.185745	0.173833	0.134597	0.00349743	0.112613	0.122057	0.0725255		6.33333	0.149628	0.220972	0.312845	0.348127	0.257893	0.0899005
6.5	0.184733	0.169975	0.135956	0.00353596	0.100767	0.118993	0.0722341		6.5	0.144346	0.226562	0.326485	0.381299	0.269673	0.105283
6.66667	0.18077	0.166367	0.134896	0.00449755	0.0936846	0.116043	0.0707456		6.66667	0.137463	0.230648	0.326031	0.402679	0.274205	0.115163
6.83333	0.174886	0.168342	0.130362	0.0057941	0.0876032	0.113397	0.0695186		6.83333	0.128869	0.230649	0.319831	0.415267	0.273654	0.122473
7	0.169242	0.176036	0.124704	0.00678808	0.0834396	0.112042	0.0696848		7	0.122902	0.233335	0.314429	0.407636	0.269576	0.120967
7.16667	0.166398	0.180849	0.118632	0.007356	0.086989	0.112045	0.0694967		7.16667	0.11692	0.23305	0.32531	0.391485	0.266691	0.119125
7.33333	0.163755	0.186991	0.117078	0.00707321	0.0888261	0.112745	0.0704839		7.33333	0.117146	0.23321	0.34333	0.376694	0.267595	0.117552
7.5	0.162975	0.19756	0.113968	0.0072855	0.0917485	0.114707	0.0729065		7.5	0.116971	0.232717	0.357946	0.358046	0.26642	0.115821
7.66667	0.159417	0.210245	0.109085	0.00756223	0.0926117	0.115784	0.0760272		7.66667	0.149357	0.232843	0.361704	0.337508	0.270353	0.0981525
7.83333	0.161718	0.222549	0.102267	0.00763176	0.0906075	0.116954	0.0806462		7.83333	0.179863	0.234132	0.351786	0.325814	0.272899	0.079962
8	0.166108	0.233219	0.106064	0.0081064	0.0882311	0.120346	0.0846576		8	0.213098	0.242897	0.335963	0.316988	0.277237	0.0586573
8.16667	0.168743	0.23373	0.106926	0.00933832	0.0842887	0.120605	0.0851479		8.16667	0.246485	0.249203	0.322231	0.320243	0.28454	0.0423958
8.33333	0.170364	0.232006	0.107976	0.0108906	0.0784711	0.119942	0.0849353		8.33333	0.285519	0.255161	0.311801	0.322384	0.293716	0.0300143
8.5	0.171869	0.223911	0.106781	0.0128132	0.0753068	0.118136	0.0823585		8.5	0.320188	0.261112	0.306092	0.321391	0.302196	0.0282561
8.66667	0.175373	0.207976	0.106759	0.0152041	0.0743221	0.115927	0.0774062		8.66667	0.35986	0.267827	0.303419	0.326673	0.314445	0.0387595
8.83333	0.180915	0.183668	0.105863	0.0159061	0.0736058	0.111992	0.0718182		8.83333	0.374429	0.270947	0.307059	0.335662	0.322024	0.043837
9	0.182186	0.161899	0.105282	0.0169918	0.0703072	0.107333	0.0673		9	0.376257	0.275464	0.311301	0.341196	0.326055	0.0429207
9.16667	0.183325	0.141828	0.101453	0.0171169	0.0704367	0.102832	0.0640277		9.16667	0.384036	0.273071	0.309701	0.345547	0.328089	0.0476095
9.33333	0.183678	0.125514	0.0971043	0.0161329	0.0708284	0.0986516	0.0623237		9.33333	0.387096	0.27046	0.295195	0.344761	0.324378	0.0519864
9.5	0.182215	0.107918	0.0911934	0.0150703	0.068913	0.0930619	0.0609063		9.5	0.382673	0.267637	0.276609	0.349179	0.319024	0.0559768
9.66667	0.182355	0.0964375	0.0858029	0.0137104	0.0662121	0.0889036	0.0611729		9.66667	0.384115	0.26379	0.261949	0.351765	0.315405	0.0620878
9.83333	0.181977	0.0939536	0.0853003	0.0123995	0.0645277	0.0876317	0.0615227		9.83333	0.378898	0.260714	0.258803	0.34862	0.311759	0.061309
10	0.181412	0.0927048	0.0813873	0.0111044	0.0632594	0.0859735	0.0618387		10	0.377891	0.261335	0.261351	0.338782	0.30984	0.0582309
10.1667	0.181532	0.0964128	0.0824957	0.0102377	0.0636144	0.0868586	0.0622184		10.1667	0.386848	0.256505	0.270945	0.331021	0.31133	0.0597984
10.3333	0.1806	0.101196	0.0829714	0.00941574	0.0605058	0.0869377	0.0626496		10.3333	0.395856	0.254861	0.281775	0.323049	0.313885	0.0614224
10.5	0.183664	0.0992158	0.0871358	0.00921921	0.0556333	0.0869735	0.0642783		10.5	0.408254	0.253791	0.304818	0.322883	0.322437	0.0642587
10.6667	0.187464	0.104189	0.0927327	0.00914794	0.0501912	0.0887449	0.0667494		10.6667	0.418686	0.253956	0.332766	0.32448	0.332472	0.0674826
10.8333	0.190401	0.11368	0.102025	0.0113263	0.0491987	0.0933263	0.068163		10.8333	0.426117	0.254897	0.350173	0.327453	0.33966	0.0705199
11	0.192725	0.115107	0.111008	0.0135385	0.0484106	0.0961578	0.0689394		11	0.429412	0.250541	0.357782	0.327248	0.341246	0.0740948
11.1667	0.194909	0.115709	0.118904	0.0166606	0.0466174	0.0985601	0.069636		11.1667	0.429434	0.245436	0.357954	0.332682	0.341377	0.0759587
11.3333	0.199201	0.110545	0.131011	0.0196141	0.0428063	0.100635	0.0718412		11.3333	0.427449	0.241701	0.355326	0.335453	0.339982	0.0765192
11.5	0.202473	0.103539	0.138774	0.022484	0.0436307	0.10218	0.0727652		11.5	0.416081	0.237938	0.352423	0.341765	0.337052	0.0737736
11.6667	0.202769	0.0999386	0.14675	0.0247008	0.0497034	0.104772	0.0721679		11.6667	0.403695	0.234567	0.342801	0.345018	0.33152	0.0705187
11.8333	0.202377	0.0990075	0.155235	0.0262443	0.0559241	0.107758	0.0717891		11.8333	0.392275	0.2326	0.322657	0.340555	0.322022	0.0665224
12	0.197972	0.0863841	0.157459	0.0254546	0.0632293	0.1061	0.0703713		12	0.383324	0.232458	0.307482	0.33201	0.313818	0.0627739
12.1667	0.190686	0.0726375	0.152011	0.0242013	0.0758106	0.103069	0.0670098		12.1667	0.379692	0.241071	0.292699	0.326077	0.309885	0.0582121
12.3333	0.183802	0.0651623	0.154146	0.0221277	0.0931739	0.103682	0.0655957		12.3333	0.380141	0.252763	0.298603	0.317949	0.312364	0.0528099
12.5	0.175688	0.0582878	0.150061	0.0194901	0.112287	0.103163	0.0643379		12.5	0.386353	0.266191	0.3127	0.312806	0.319513	0.049673
12.6667	0.17077	0.0510239	0.151925	0.0183509	0.126141	0.103642	0.0659296		12.6667	0.398679	0.279746	0.332134	0.309223	0.329945	0.0505913
12.8333	0.167446	0.0480648	0.156111	0.0172742	0.132595	0.104298	0.067469		12.8333	0.40892	0.294897	0.343267	0.302848	0.337483	0.0521211
13	0.165914	0.0530996	0.15798	0.0172473	0.142784	0.107405	0.0676578		13	0.416804	0.309782	0.344088	0.301074	0.342937	0.0526289
13.1667	0.168141	0.0515789	0.164493	0.0191426	0.151853	0.111042	0.0702927		13.1667	0.42481	0.319508	0.342061	0.307478	0.348464	0.0528774
13.3333	0.172444	0.0837864	0.175542	0.0223126	0.160167	0.12285	0.0675689		13.3333	0.42725	0.322101	0.338545	0.311912	0.349952	0.0526874
13.5	0.179714	0.0926598	0.184744	0.0240631	0.162636	0.128763	0.0691787		13.5	0.423257	0.321393	0.336616	0.316789	0.349514	0.049887
13.6667	0.18568	0.0926598	0.19903	0.0286297	0.165825	0.134365	0.0719786		13.6667	0.415388	0.318236	0.330932	0.318424	0.345745	0.0468072
13.8333	0.19053	0.101907	0.208141	0.0325266	0.163066	0.139234	0.0719846		13.8333	0.406195	0.316301	0.32187	0.31662	0.340247	0.04404
14	0.194253	0.112264	0.213186	0.0349257	0.162565	0.143439	0.071693		14	0.395136	0.311042	0.30906	0.315926	0.332791	0.0416635
14.1667	0.194883	0.131317	0.210059	0.0361377	0.156655	0.14581	0.0687237		14.1667	0.393517	0.3019	0.29755	0.312094	0.326265	0.0452472
14.3333	0.194589	0.137587	0.208782	0.0362367	0.153265	0.146092	0.0679595		14.3333	0.388581	0.295366	0.29512	0.310391	0.322365	0.0447183
14.5	0.194167	0.147165	0.204599	0.0349679	0.141868	0.144553	0.0672495		14.5	0.3882	0.290041	0.303494	0.311679	0.323353	0.0441418
14.6667	0.191176	0.157127	0.202831	0.0359872	0.13166	0.143756	0.0664789		14.6667	0.390514	0.285845	0.315496	0.312931	0.326197	0.0449275
14.8333	0.189638	0.155801	0.196782	0.0339108	0.121573	0.139541	0.0662028		14.8333	0.391792	0.285314	0.33082	0.316723	0.331163	0.0446714
15	0.191545	0.160055	0.199242	0.0334627	0.120725	0.141006	0.0676117		15	0.390122	0.283715	0.340945	0.321302	0.334021	0.0443011
15.1667	0.194452	0.153619	0.198851	0.0353327	0.122831	0.141017	0.0668184		15.1667	0.390038	0.281514	0.35709	0.330931	0.339893	0.0458209
15.3333	0.199379	0.148463	0.204257	0.0359724	0.133091	0.144233	0.0680192		15.3333	0.385659	0.284095	0.366424	0.346958	0.345784	0.0440564
15.5	0.202745	0.146819	0.206094	0.0366354	0.141441	0.146747	0.0685759		15.5	0.381791	0.288254	0.367303	0.357762	0.348778	0.0415406
15.6667	0.205753	0.141722	0.209661	0.0372721	0.149237	0.148729	0.0697074		15.6667	0.383296	0.295684	0.360833	0.375538	0.353838	0.0398727
15.8333	0.208667	0.141041	0.207657	0.0378376	0.152734	0.149587	0.0697019		15.8333	0.384271	0.299839	0.350846	0.38927	0.356057	0.0411774
16	0.206735	0.150033	0.202488	0.0373493	0.148386	0.148998	0.0683036		16	0.3842	0.304616	0.341096	0.398993	0.357226	0.0428175
16.1667	0.20289	0.152463	0.190972	0.0348673	0.14046	0.14433	0.0664604		16.1667	0.369149	0.310957	0.33832	0.406198	0.356156	0.0409639
16.3333	0.198707	0.165348	0.182177	0.0325269	0.128026	0.141357	0.0662429		16.3333	0.358885	0.318509	0.344505	0.408476	0.357594	0.0378136
16.5	0.192756	0.179204	0.174356	0.0318196	0.110868	0.137801	0.0671343		16.5	0.347652	0.326295	0.350014	0.409044	0.358251	0.0355027
16.6667	0.187142	0.183692	0.168623	0.0322758	0.0909399	0.132535	0.0683436		16.6667	0.340802	0.332602	0.35274	0.40826	0.358601	0.0341231
16.8333	0.18092	0.203605	0.163298	0.0337743	0.0743774	0.131195	0.0732554		16.8333	0.326664	0.33696	0.353574	0.401134	0.354583	0.0329546
17	0.175989	0.211816	0.161753	0.0348199	0.0623421	0.129344	0.0765699		17	0.310533	0.339916	0.35381	0.395541	0.34995	0.0353449
17.1667	0.17505	0.212454	0.161705	0.0380962	0.0595109	0.129363	0.0762338		17.1667	0.293994	0.333362	0.356644	0.392809	0.344202	0.0414562
17.3333	0.175238	0.210564	0.163151	0.0411237	0.0586218	0.12974	0.0752157		17.3333	0.299411	0.326041	0.346953	0.390529	0.340733	0.0384784
17.5	0.17331	0.20473	0.165209	0.0433062	0.0592611	0.129163	0.0728293		17.5	0.30747	0.318158	0.336837	0.386068	0.337133	0.0348073
17.6667	0.172525	0.194914	0.167002	0.0462855	0.0628533	0.128716	0.0687387		17.6667	0.311273	0.303916	0.325261	0.381163	0.330403	0.034979
17.8333	0.172985	0.192256	0.165847	0.0472284	0.0739502	0.130453	0.0651924		17.8333	0.315218	0.292173	0.325925	0.372786	0.326525	0.0339035
18	0.174277	0.187444	0.161319	0.0482501	0.0820641	0.130671	0.0616843		18	0.317545	0.274304	0.330972	0.362508	0.321332	0.0365806
18.1667	0.175401	0.193429	0.157084	0.0476944	0.0952867	0.133779	0.060675		18.1667	0.32912	0.259491	0.341471	0.35493	0.321253	0.0425026
18.3333	0.178209	0.192006	0.153324	0.0473167	0.109981	0.136167	0.0586514		18.3333	0.34456	0.252825	0.34979	0.34585	0.323256	0.0470069
18.5	0.177219	0.200491	0.147591	0.0479731	0.129346	0.140524	0.0584875		18.5	0.356916	0.24578	0.362832	0.33163	0.324289	0.0540606
18.6667	0.182449	0.204262	0.141407	0.0485699	0.152143	0.145766	0.0597374		18.6667	0.362444	0.246042	0.379692	NaN	0.329393	0.0726973
18.8333	0.186258	0.207892	0.132279	0.049794	0.167039	0.148653	0.061852		18.8333	0.36982	0.252307	0.388928	NaN	0.337018	0.0739816
19	0.186865	0.213804	0.123875	0.0490508	0.173422	0.149403	0.0649038		19	0.377382	0.257805	0.393166	NaN	0.342784	0.0740162
19.1667	0.18803	0.214307	0.113853	0.0501936	0.189215	0.15112	0.0677885		19.1667	0.390669	0.266461	0.394669	NaN	0.3506	0.0728936
19.3333	0.188809	0.206526	0.106509	0.0536853	0.201539	0.151414	0.0680362		19.3333	0.397885	0.275908	0.394856	NaN	0.356216	0.0695655
19.5	0.186737	0.204827	0.101323	0.0548792	0.21316	0.152185	0.0702466		19.5	0.400154	0.285273	0.395554	NaN	0.360327	0.0650395
19.6667	0.187322	0.193866	0.0956328	0.0551737	0.21702	0.149803	0.0702789		19.6667	0.397153	0.289982	0.408969	NaN	0.365368	0.0655528
19.8333	0.183479	0.180141	0.0945495	0.0553666	0.216933	0.146094	0.0679399		19.8333	0.393707	0.288688	0.428838	NaN	0.370411	0.0729211
20	0.181327	0.168055	0.0927329	0.0544391	0.225193	0.144349	0.0693056		20	0.38974	0.289134	0.450414	NaN	0.37643	0.0814596
20.1667	0.183098	0.148853	0.0950871	0.0551057	0.239787	0.144386	0.0724934		20.1667	0.382209	0.291179	0.473234	NaN	0.382207	0.0910275
20.3333	0.182783	0.127301	0.0984271	0.053146	0.241388	0.140609	0.0733845		20.3333	0.368156	0.295948	0.48455	NaN	0.382885	0.0951599
20.5	0.182603	0.111231	0.099812	0.0499006	0.239163	0.136542	0.0744129		20.5	0.349938	0.302027	0.487786	NaN	0.379917	0.09644
20.6667	0.184417	0.0921856	0.104757	0.0508057	0.230093	0.132452	0.0729531		20.6667	0.339447	0.312934	0.483254	NaN	0.378545	0.0916445
20.8333	0.185725	0.0777307	0.110568	0.0516997	0.210177	0.12718	0.068437		20.8333	0.334465	0.33027	0.481945	NaN	0.382227	0.0863843
21	0.18816	0.071911	0.120364	0.0532755	0.190228	0.124788	0.0636944		21	0.333181	0.345029	0.479809	NaN	0.386006	0.081451
21.1667	0.190572	0.0624838	0.131567	0.0547192	0.165999	0.121068	0.0608155		21.1667	0.330514	0.357341	0.475478	NaN	0.387778	0.077126
21.3333	0.194295	0.0567513	0.145591	0.0580181	0.134765	0.117884	0.0596079		21.3333	0.32387	0.372229	0.458028	NaN	0.384709	0.0679444
21.5	0.198345	0.0546956	0.159807	0.0607526	0.109193	0.116559	0.0623599		21.5	0.321682	0.387772	0.438208	NaN	0.382554	0.0584383
21.6667	0.200339	0.0524949	0.172024	0.0645457	0.0846169	0.114804	0.0669141		21.6667	0.32086	0.398233	0.418938	NaN	0.379344	0.0516953
21.8333	0.200431	0.106207	0.180532	0.0653381	0.0618385	0.122869	0.0645233		21.8333	0.320153	0.401543	0.405418	NaN	0.375705	0.0481478
22	0.201542	0.150333	0.191952	0.0682149	0.0543877	0.133286	0.0686485		22	0.317935	0.402693	0.391487	NaN	0.370705	0.0460424
22.1667	0.200839	0.165332	0.191524	0.069581	0.052484	0.135952	0.0698817		22.1667	0.317025	0.41116	0.376857	NaN	0.368347	0.0476408
22.3333	0.201857	0.168957	0.196722	0.0719224	0.0521803	0.138328	0.0710897		22.3333	0.318331	0.415685	0.362325	NaN	0.365447	0.0487519
22.5	0.199235	0.17683	0.192433	0.072331	0.0546124	0.139088	0.0697862		22.5	0.326289	0.414277	0.357999	NaN	0.366188	0.0445616
22.6667	0.197462	0.189931	0.194285	0.0730974	0.0586026	0.142675	0.0703695		22.6667	0.332758	0.412351	0.360476	NaN	0.368528	0.0404029
22.8333	0.197306	0.197774	0.194415	0.074138	0.0612648	0.144979	0.0707033		22.8333	0.35046	0.412982	0.367372	NaN	0.376938	0.0323399
23	0.197204	0.210433	0.193443	0.0752314	0.0615034	0.147563	0.0727323		23	0.36367	0.405171	0.375012	NaN	0.381285	0.02145
23.1667	0.199775	0.224333	0.191596	0.0749068	0.0620169	0.150526	0.0760131		23.1667	0.381634	0.402234	0.384612	NaN	0.389493	0.0111339
23.3333	0.201229	0.229176	0.193403	0.0761469	0.059897	0.15197	0.0779912		23.3333	0.400451	0.388776	0.39114	NaN	0.393456	0.00617255
23.5	0.200138	0.232836	0.190424	0.0739535	0.0584748	0.151165	0.0793141		23.5	0.415346	0.378438	0.405752	NaN	0.399846	0.0191501
23.6667	0.200774	0.229591	0.191577	0.0715868	0.0545959	0.149625	0.0804539		23.6667	0.42865	0.369323	0.421653	NaN	0.406542	0.0324218
23.8333	0.199017	0.217469	0.186619	0.0687996	0.0536817	0.145117	0.0775358		23.8333	0.445524	0.363541	0.444413	NaN	0.417826	0.0470157
24	0.197853	0.205795	0.185947	0.0648313	0.0557973	0.142045	0.0750111		24	0.446446	0.357674	0.469398	NaN	0.424506	0.0590049
