# Supplementary material for: Cortical waves mediate the cellular response to electric fields
Source: eLife. 2022 Mar 23;11:e73198. doi: 10.7554/eLife.73198 (PMC8942472; doi:10.7554/eLife.73198)
Supplement: Figure 2—source data 2. — Related to Figure 2d. [file elife-73198-fig2-data2.xlsx]

## Sheet: Sheet1
Figure 2 - Source Data 2
Figure 2d. Wave size parallel/ perpendicular to ridges
Note : the unit is µm
No EF		20 V/cm EF
Wave size//ridge	Wave size perpendicular to ridge	Wave size//ridge	Wave size perpendicular to ridge
8.81016	3.56602	3.56602	3.14648
10.4883	7.3418	13.0055	7.3418
12.3762	10.9078	7.55156	7.76133
5.03437	6.0832	5.87344	6.0832
5.66367	3.98555	4.40508	2.30742
10.698	3.35625	11.9566	3.14648
5.03437	4.40508	4.19531	2.51719
3.35625	3.98555	2.30742	4.61484
8.39062	5.03437	4.19531	4.19531
6.7125	2.72695	10.4883	11.3273
4.61484	2.51719	6.0832	2.72695
7.13203	1.88789	3.14648	4.61484
6.50273	6.7125	9.64922	7.3418
3.14648	2.93672	10.0687	6.92227
12.5859	5.87344	5.24414	3.56602
5.45391	3.56602	6.29297	3.35625
5.87344	2.09766	6.29297	2.09766
15.3129	9.01992	14.0543	8.18086
3.14648	3.14648	14.6836	4.82461
8.39062	5.87344	3.98555	2.72695
10.4883	7.13203	5.45391	2.30742
5.45391	4.40508	3.98555	3.35625
10.4883	4.19531	12.1664	7.76133
4.40508	3.35625	11.9566	2.09766
8.60039	6.29297	5.03437	5.24414
5.45391	3.77578	13.6348	6.29297
5.45391	2.72695	6.0832	2.93672
5.03437	4.61484	2.72695	3.35625
23.7035	5.45391	7.55156	3.98555
6.92227	6.50273	5.24414	3.14648
4.19531	3.56602	7.76133	4.82461
5.03437	3.56602	3.14648	3.56602
5.66367	3.14648	6.7125	4.40508
3.56602	2.72695	8.39062	2.93672
10.0687	4.40508	3.56602	3.14648
11.7469	7.3418	19.0887	2.09766
4.61484	2.93672	10.4883	6.7125
3.14648	2.93672	9.43945	4.19531
9.85898	8.18086	4.61484	3.77578
3.98555	3.56602	11.5371	1.88789
5.66367	3.35625	15.7324	6.7125
6.92227	3.98555	6.0832	3.98555
6.50273	3.35625	16.152	10.698
4.40508	2.93672	5.24414	2.72695
4.40508	3.56602	14.2641	4.40508
5.87344	2.09766	8.81016	4.19531
3.77578	3.14648	13.2152	4.61484
7.13203	4.19531	8.18086	8.81016
3.98555	2.93672	6.29297	2.93672
9.01992	3.56602	24.3328	5.24414
4.19531	3.14648	7.55156	4.19531
5.03437	2.93672	4.40508	2.51719
3.35625	2.72695	7.97109	4.40508
3.77578	5.03437	3.77578	2.09766
5.87344	5.66367	13.0055	11.3273
4.61484	2.72695	3.98555	2.93672
8.60039	2.51719	5.24414	2.93672
7.55156	6.50273	5.87344	6.29297
5.03437	2.30742	16.5715	5.24414
7.55156	2.51719	10.4883	3.35625
5.45391	2.51719	5.03437	3.14648
3.14648	3.77578	23.7035	17.6203
5.45391	4.40508	7.13203	2.93672
3.98555	2.09766	7.3418	1.25859
3.98555	4.40508	7.55156	1.25859
10.698	5.45391	13.8445	1.46836
5.24414	3.98555	8.60039	1.46836
2.93672	3.14648	8.39062	1.46836
4.61484	8.39062	19.718	3.98555
4.82461	3.77578	5.45391	2.72695
3.77578	3.56602	3.35625	2.93672
5.66367	6.50273	8.81016	8.18086
8.18086	8.18086	3.98555	2.72695
5.45391	4.61484	9.43945	2.72695
6.92227	5.87344	22.8645	19.718
2.93672	3.14648	4.61484	3.98555
2.93672	3.14648	4.40508	3.98555
5.66367	3.56602	3.98555	3.35625
5.45391	5.24414	4.40508	4.61484
4.61484	5.03437	9.85898	4.40508
11.3273	11.3273	8.39062	7.55156
7.55156	2.72695	5.66367	3.14648
3.56602	5.66367	5.87344	7.55156
3.35625	2.72695	6.0832	2.93672
3.98555	3.14648	3.35625	2.30742
5.24414	4.82461	4.61484	2.09766
4.19531	4.82461	3.56602	2.30742
5.87344	7.3418	5.24414	2.30742
9.43945	6.7125	12.1664	2.72695
3.14648	2.93672	6.0832	2.09766
4.19531	6.50273	6.29297	4.40508
5.24414	3.77578	5.03437	2.51719
3.56602	2.51719	10.2785	5.03437
3.56602	3.35625	3.98555	2.51719
7.13203	3.98555	4.40508	5.45391
12.3762	8.60039	3.14648	2.51719
11.5371	7.13203	3.77578	2.72695
8.18086	2.93672	7.55156	6.92227
22.6547	10.2785	7.55156	6.29297
12.7957	5.03437	3.77578	4.82461
7.3418	4.82461	3.35625	2.93672
3.14648	3.35625	3.14648	2.30742
7.97109	4.61484	3.77578	3.98555
5.24414	5.24414	5.45391	3.56602
3.56602	3.77578	9.43945	4.19531
9.01992	6.7125	11.5371	2.30742
4.61484	4.40508	10.0687	8.60039
4.40508	3.98555	8.18086	5.87344
5.66367	3.56602	6.29297	5.03437
8.60039	4.19531	14.2641	10.2785
8.18086	4.19531	4.40508	6.0832
7.13203	4.61484	4.82461	5.24414
3.98555	3.35625	7.13203	9.01992
6.50273	3.14648	6.0832	3.77578
3.98555	2.51719	8.60039	4.61484
4.40508	2.30742	15.5227	14.8934
5.45391	3.77578	4.19531	3.35625
5.03437	2.51719	4.61484	6.0832
3.56602	2.93672	3.77578	3.98555
5.87344	3.35625	6.29297	1.46836
4.82461	2.51719	5.03437	4.61484
11.7469	5.87344	9.22969	2.72695
9.01992	3.56602	10.698	6.50273
3.14648	2.72695	5.87344	5.87344
4.82461	2.30742	12.7957	7.76133
3.35625	3.56602	6.92227	4.82461
8.39062	6.50273	7.13203	7.3418
6.0832	2.93672	6.50273	5.66367
3.14648	3.56602	4.61484	1.67813
3.77578	2.51719	3.56602	2.51719
3.56602	2.93672	5.24414	5.03437
3.56602	2.93672	5.03437	3.77578
4.61484	4.19531	3.56602	2.30742
2.72695	3.35625	11.7469	2.72695
5.03437	3.14648	3.35625	5.45391
7.97109	4.61484	9.01992	1.46836
4.19531	2.72695	4.40508	3.56602
9.43945	5.24414	8.81016	12.7957
15.9422	13.0055	3.56602	3.98555
6.29297	2.72695	3.14648	3.77578
8.81016	4.82461	3.98555	2.09766
4.61484	2.72695	3.14648	2.51719
5.87344	2.09766	2.72695	4.40508
9.43945	5.03437	5.24414	3.77578
9.85898	2.51719	6.50273	9.64922
5.24414	2.09766	3.35625	2.72695
7.76133	2.09766	5.45391	3.56602
4.19531	2.72695	4.19531	6.92227
4.61484	2.51719	3.35625	3.56602
4.40508	3.56602	5.03437	2.30742
7.55156	5.45391	4.40508	5.24414
5.45391	2.72695	8.39062	4.61484
2.93672	3.14648	5.03437	6.92227
2.93672	3.98555	6.92227	4.82461
11.9566	6.7125	3.35625	3.77578
5.87344	3.35625	7.55156	7.76133
15.7324	1.46836	4.61484	5.87344
5.87344	4.40508	4.40508	4.19531
2.93672	2.72695	5.45391	4.82461
6.7125	3.77578	6.29297	6.0832
5.03437	3.14648	3.77578	3.14648
13.425	4.61484	5.45391	5.87344
4.82461	1.88789	11.1176	10.4883
4.40508	2.51719	5.87344	3.98555
6.29297	2.93672	7.13203	6.50273
5.03437	2.09766	3.14648	2.72695
3.56602	3.14648	3.77578	3.98555
15.1031	6.0832	5.66367	4.19531
3.56602	2.72695	6.92227	5.45391
5.45391	3.14648	3.98555	3.56602
9.85898	3.35625	6.92227	11.1176
8.39062	2.51719	5.45391	1.88789
7.3418	1.67813	6.0832	5.03437
4.82461	4.40508	4.19531	2.51719
5.03437	1.88789	3.56602	2.72695
6.7125	3.56602	16.5715	8.81016
9.85898	3.14648	4.82461	2.51719
11.5371	3.56602	6.50273	3.77578
7.97109	6.29297	13.2152	20.7668
3.56602	2.30742	4.19531	5.03437
10.0687	3.56602	3.98555	4.82461
6.7125	6.92227	5.03437	4.61484
6.50273	3.56602	3.14648	3.98555
5.87344	2.93672	4.40508	6.50273
4.40508	2.93672	4.19531	8.60039
5.87344	2.51719	4.40508	5.87344
9.85898	6.0832	3.14648	4.40508
3.14648	3.98555	5.03437	4.19531
7.13203	3.98555	9.22969	6.92227
2.93672	3.35625	3.98555	3.56602
3.14648	4.82461	5.03437	5.45391
5.66367	2.72695	4.82461	4.40508
4.40508	3.98555	2.72695	3.56602
5.66367	1.88789	8.39062	5.03437
7.76133	2.51719	5.24414	4.40508
5.45391	3.14648	3.14648	3.35625
4.61484	4.19531	5.24414	2.51719
7.55156	3.56602	3.98555	3.77578
5.87344	5.66367	3.98555	3.35625
9.85898	3.56602	3.35625	3.56602
9.22969	5.24414	7.55156	6.7125
7.55156	2.30742	3.35625	3.77578
10.0687	3.77578	5.24414	6.7125
4.61484	2.51719	2.93672	2.93672
4.61484	2.51719	3.14648	2.93672
9.85898	6.92227	15.1031	11.9566
6.0832	2.72695	14.8934	10.698
7.76133	5.03437	18.0398	14.0543
4.19531	2.51719	20.3473	12.1664
15.5227	5.66367	13.8445	14.6836
2.72695	2.93672	7.13203	5.87344
6.50273	3.56602	14.0543	10.0687
6.92227	6.29297	6.7125	7.3418
9.01992	5.87344	5.03437	6.0832
5.03437	3.77578	8.39062	6.92227
6.0832	4.61484	7.76133	5.66367
6.92227	3.35625	5.87344	6.92227
3.14648	3.35625	4.82461	5.24414
4.61484	2.93672	9.01992	6.92227
4.40508	2.93672	3.14648	2.72695
7.13203	2.51719	2.72695	3.14648
3.98555	2.51719	19.2984	7.3418
6.92227	4.61484	7.13203	3.35625
3.56602	2.72695	4.19531	3.35625
7.13203	2.72695	3.98555	5.45391
9.43945	6.29297	2.72695	3.56602
13.2152	4.82461	7.76133	4.61484
7.76133	3.14648	5.24414	2.51719
4.19531	3.14648	3.56602	3.14648
3.35625	3.14648	11.3273	6.29297
5.66367	2.30742	4.19531	2.72695
2.72695	3.14648	5.87344	1.88789
7.97109	5.03437	4.40508	7.55156
5.87344	5.03437	10.9078	5.66367
3.77578	2.51719	3.77578	3.98555
13.8445	6.0832	3.77578	2.09766
8.18086	8.39062	7.3418	5.87344
4.61484	3.35625	3.56602	3.56602
4.61484	2.30742	10.2785	4.61484
5.24414	2.51719	3.35625	3.77578
4.40508	6.0832	10.0687	7.55156
3.56602	4.40508	4.40508	3.35625
3.14648	2.72695	6.0832	4.61484
4.82461	2.51719	11.1176	6.29297
2.93672	2.72695	13.0055	7.55156
4.40508	2.93672	3.98555	2.09766
3.56602	2.30742	4.40508	2.51719
6.7125	1.67813	8.18086	4.40508
3.35625	3.35625	4.82461	4.40508
3.56602	3.98555	3.14648	2.72695
4.82461	1.88789	4.82461	3.56602
3.14648	2.30742	20.557	15.1031
		6.50273	2.30742
		6.7125	10.2785
		9.64922	6.0832
		19.0887	7.13203
		4.82461	2.93672
		6.29297	4.19531
		3.56602	2.30742
		3.98555	3.98555
		3.56602	2.93672
		3.35625	2.93672
		10.0687	3.77578
		6.92227	2.30742
		5.24414	3.14648
		3.56602	2.51719
		10.2785	4.19531
		3.77578	4.61484
		3.14648	3.35625
		4.61484	2.30742
		5.03437	5.03437
		3.14648	4.40508
		4.40508	3.14648
		6.92227	4.82461
		3.14648	4.40508
		8.81016	1.25859
		9.22969	3.35625
		4.82461	4.19531
		5.66367	1.46836
		5.66367	5.66367
		5.66367	2.09766
		5.45391	4.40508
		8.81016	5.03437
		14.4738	5.03437
		11.7469	4.82461
		19.0887	7.55156
		6.7125	4.19531
		3.98555	2.09766
		15.7324	9.64922
		5.24414	2.30742
		5.24414	2.30742
		8.18086	4.82461
		4.40508	4.19531
		4.40508	4.40508
		3.77578	4.40508
		4.61484	3.35625
		5.24414	5.03437
		4.19531	2.72695
		5.66367	2.93672
		9.01992	6.92227
		7.13203	6.29297
		6.0832	2.09766
		3.98555	4.82461
		4.82461	3.98555
		8.81016	5.24414
		4.40508	5.03437
		7.97109	5.24414
		5.24414	2.51719
		6.92227	5.45391
		12.5859	12.3762
		6.50273	2.93672
		14.0543	8.18086
		5.87344	6.92227
		13.2152	5.87344
		3.56602	2.51719
		8.39062	3.77578
		4.19531	2.51719
		4.40508	3.56602
		2.93672	3.35625
		6.92227	2.93672
		5.45391	4.61484
		6.92227	9.01992
		8.18086	3.98555
		4.61484	5.66367
		4.40508	2.51719
		7.55156	2.72695
		17.4105	9.22969
		13.0055	3.56602
		8.18086	7.3418
		9.64922	2.72695
		6.92227	3.98555
		2.72695	3.98555
		4.40508	1.67813
		5.45391	2.09766
		12.1664	6.7125
		19.0887	16.3617
		9.01992	3.98555
		3.77578	3.77578
		7.55156	1.46836
		22.4449	10.9078
		4.40508	5.24414
		14.2641	5.66367
		3.35625	3.35625
		5.03437	2.72695
		3.14648	2.09766
		6.92227	3.98555
		7.3418	2.72695
		11.7469	5.03437
		6.0832	2.93672
		20.1375	5.45391
		6.92227	1.88789
		5.03437	3.14648
		14.4738	5.24414
		9.64922	4.82461
		6.50273	3.14648
		5.24414	2.30742
		5.45391	4.40508
		4.82461	3.14648
		6.29297	3.56602
		6.29297	3.56602
		3.35625	3.14648
		5.66367	3.14648
		7.97109	2.72695
		7.55156	2.51719
		4.19531	2.09766
		8.81016	5.87344
		2.51719	3.56602
		3.56602	3.56602
		10.2785	4.40508
		11.3273	1.25859
		10.4883	3.14648
		3.77578	2.51719
		5.66367	3.77578
		7.76133	2.51719
		15.3129	5.24414
		12.7957	2.51719
		5.45391	4.40508
		6.29297	5.03437
		15.7324	6.92227
		10.9078	8.81016
		6.29297	3.14648
		21.3961	5.03437
		6.29297	1.88789
		7.97109	3.14648
		8.60039	1.88789
		11.5371	3.77578
		14.6836	9.22969
		20.557	13.2152
		6.92227	7.13203
		7.97109	3.35625
		16.7812	2.93672
		10.2785	8.81016
		7.3418	3.14648
		11.3273	6.7125
		23.7035	3.14648
		7.13203	1.25859
		8.18086	5.24414
		8.39062	5.03437
		13.0055	1.25859
		16.5715	6.7125
		5.66367	3.35625
		5.45391	2.51719
		23.4937	5.66367
		6.7125	7.3418
		9.01992	4.61484
		6.0832	3.56602
		8.18086	2.51719
		5.87344	3.14648
		3.14648	3.35625
		6.50273	3.14648
		5.03437	5.87344
		7.55156	9.43945
		2.72695	3.77578
		3.98555	3.56602
		4.40508	2.30742
		3.14648	3.77578
		23.0742	11.3273
		2.72695	3.35625
		5.03437	3.14648
		11.9566	3.77578
		4.19531	3.14648
		5.24414	4.19531
		7.55156	2.51719
		3.77578	2.51719
		2.93672	3.35625
		7.55156	2.30742
		3.35625	2.51719
		10.698	6.0832
		22.4449	4.40508
		7.76133	3.56602
		3.98555	3.56602
		19.718	8.39062
		3.56602	3.14648
		4.82461	1.88789
		3.77578	2.09766
		5.03437	3.35625
		5.24414	4.19531
		10.698	3.98555
		6.7125	5.45391
		5.66367	1.88789
		14.4738	6.29297
		14.6836	3.35625
		2.51719	3.98555
		20.9766	3.98555
		9.22969	3.98555
		8.60039	3.14648
		5.24414	4.82461
		3.56602	3.98555
		9.01992	3.77578
		8.81016	5.24414
		9.22969	2.30742
		18.4594	6.29297
		5.45391	3.35625
		3.35625	3.77578
		6.29297	3.56602
		3.98555	2.72695
		23.7035	3.14648
		14.2641	2.09766
		20.3473	6.7125
		3.98555	3.77578
		4.19531	1.88789
		5.66367	1.88789
		9.43945	4.82461
		3.98555	2.30742
		3.98555	2.09766
		4.61484	4.61484
		18.4594	2.09766
		19.0887	4.82461
		17.6203	7.13203
		6.7125	2.51719
		18.6691	5.03437
		10.9078	3.98555
		3.56602	2.93672
		6.29297	5.03437
		22.2352	3.77578
		7.13203	3.14648
		8.39062	4.82461
		4.40508	2.51719
		9.01992	3.35625
		3.14648	2.72695
		7.76133	3.98555
		4.82461	2.72695
		6.92227	2.72695
		6.50273	3.35625
		13.2152	2.30742
		11.5371	1.67813
		7.13203	3.98555
		8.81016	3.35625
		5.24414	2.51719
		7.13203	7.97109
		7.55156	2.09766
		4.61484	2.30742
		3.77578	3.14648
		8.60039	2.93672
		13.425	5.87344
		8.81016	1.46836
		7.3418	2.09766
		13.2152	5.03437
		3.98555	3.77578
		13.2152	2.93672
		11.7469	1.25859
		3.56602	2.30742
		3.14648	2.93672
		3.98555	2.72695
		3.35625	2.72695
		12.3762	1.67813
