# Supplementary material for: Cortical waves mediate the cellular response to electric fields
Source: eLife. 2022 Mar 23;11:e73198. doi: 10.7554/eLife.73198 (PMC8942472; doi:10.7554/eLife.73198)
Supplement: Figure 2—source data 3. — Related to Figure 2e. [file elife-73198-fig2-data3.xlsx]

## Sheet: Sheet1
Figure 2 - Source Data 3
Figure 2e. Wave duration and wave area
no EF		20 V/cm EF
Duration (min)	Area (µm^2)	Duration (min)	Area (µm^2)
0.166667	23.6289	5.66667	469.805
0.666667	41.9335	0.333333	5.58821
1.5	152.818	1.33333	39.1174
2	66.2224	0.333333	29.7451
2.16667	13.4205	0.333333	16.8086
0.166667	11.2204	0.166667	6.07222
0.166667	26.049	0.333333	23.0568
0.333333	8.40431	0.166667	6.07222
0.166667	8.75632	0.166667	6.29223
0.333333	17.9087	0.166667	9.32834
0.166667	13.2005	0.666667	61.4703
0.166667	7.17226	0.166667	9.90036
0.166667	9.50435	0.166667	8.1843
0.333333	15.2246	0.666667	30.8451
0.166667	5.23619	0.5	30.1411
0.166667	37.2254	1	8.88833
0.5	10.9564	0.5	13.6845
2.5	128.045	0.166667	10.2964
0.166667	8.49231	3.5	197.127
1.5	45.6297	1.5	48.8418
0.166667	6.29223	0.666667	36.7854
0.833333	22.6168	0.166667	5.76421
0.666667	32.5172	0.166667	8.1843
1	12.1444	0.166667	6.55624
0.166667	31.1091	0.5	56.4981
0.166667	6.42424	0.166667	22.7488
0.333333	24.8609	0.333333	13.3325
0.333333	13.9045	0.833333	45.8057
0.333333	7.17226	0.166667	10.8684
0.666667	13.0685	0.166667	5.28019
1.33333	68.8185	0.166667	13.3765
1.66667	21.6048	0.166667	9.63635
0.333333	6.99626	0.333333	15.7086
0.333333	11.0004	0.166667	6.68825
0.166667	9.32834	0.166667	16.8086
0.166667	5.5002	0.166667	19.7567
0.5	22.0008	0.166667	7.04026
1.5	24.7729	0.166667	33.7492
0.166667	8.71232	1	33.2652
0.166667	6.16023	0.5	17.3806
0.833333	40.9215	0.333333	10.0324
0.166667	5.89622	0.166667	18.8767
0.166667	12.1884	0.166667	72.1187
1.16667	15.4446	0.333333	12.8045
0.166667	15.7966	1.33333	65.1224
0.333333	7.61228	0.166667	9.85636
0.333333	9.32834	0.833333	41.8895
0.166667	8.44831	0.166667	21.6928
0.166667	6.77625	0.166667	46.5977
0.333333	14.5645	1.33333	33.1772
0.166667	8.71232	0.333333	9.46035
0.333333	19.7567	0.666667	99.8837
0.166667	7.87629	3	274.482
0.166667	9.28434	0.5	19.6247
0.166667	5.23619	0.166667	5.76421
0.5	9.98837	0.333333	19.4487
0.333333	14.1685	0.166667	5.14819
0.333333	6.77625	3.33333	67.9385
0.166667	16.6766	0.166667	6.20423
0.166667	21.2088	0.5	7.43627
0.166667	8.44831	0.5	18.5687
0.166667	16.4566	0.333333	74.2307
0.166667	10.1204	0.333333	21.8248
0.166667	8.40431	0.166667	7.92029
0.666667	15.9286	1.16667	229.028
0.166667	5.94022	0.166667	10.8244
0.666667	9.90036	0.166667	8.36031
1.5	25.7849	0.166667	8.71232
0.833333	12.2765	0.166667	18.7007
0.333333	5.89622	0.166667	11.4844
1.83333	17.1606	0.166667	11.3084
2	11.0444	0.166667	63.2303
0.666667	9.98837	0.166667	8.40431
3.5	13.5965	0.166667	5.72021
3	29.4811	0.833333	34.6293
0.833333	14.1685	0.166667	6.02822
3	15.7086	0.166667	22.5288
0.5	6.38023	2.5	205.972
0.166667	5.76421	0.166667	12.0564
0.333333	11.5724	0.166667	12.5845
1.33333	16.4126	0.166667	7.87629
0.666667	12.8925	0.166667	9.98837
2.66667	37.1814	0.166667	18.2167
0.333333	14.9165	0.666667	32.8252
1.33333	11.0004	0.166667	9.90036
0.166667	6.82025	1	23.8489
0.666667	8.0963	0.166667	10.8684
1	12.8925	0.166667	5.19219
0.166667	13.2885	0.5	7.34827
1.83333	21.6048	0.166667	5.67621
1	27.897	0.166667	8.2283
0.333333	6.55624	0.333333	25.8289
0.833333	10.0764	0.333333	8.66832
0.333333	10.3404	0.166667	12.3205
0.333333	6.77625	0.166667	9.50435
0.333333	6.73225	0.833333	27.809
0.166667	17.6446	0.166667	6.16023
2.66667	48.0938	0.333333	13.2885
1.66667	43.9576	0.166667	5.06019
0.333333	14.8725	0.166667	5.58821
1.83333	107.452	0.333333	24.3769
1.5	29.5691	0.166667	20.1087
0.666667	17.4246	0.333333	12.3205
0.166667	6.02822	0.166667	5.80821
0.666667	16.5446	0.166667	5.4562
0.666667	12.9365	0.333333	8.49231
0.5	6.11622	0.166667	11.3964
1.83333	21.5608	0.166667	30.4491
0.5	13.2445	0.166667	22.3528
0.333333	9.46035	0.166667	38.4574
0.5	12.2765	0.166667	24.5529
1	23.0568	0.166667	16.3686
0.166667	14.1685	3.66667	53.462
1.16667	16.3686	1.16667	13.9925
0.166667	7.30427	1.5	11.7924
0.333333	11.4844	1.16667	30.8011
0.333333	5.85222	1.16667	12.6725
0.166667	5.98422	1.5	26.445
0.166667	9.02033	4.66667	61.8223
0.166667	7.21627	0.666667	8.53631
0.5	6.42424	0.833333	12.9805
0.666667	11.3084	1.83333	9.54835
0.333333	6.95226	0.166667	8.53631
1.16667	30.8011	0.833333	12.8925
0.833333	15.4886	0.333333	15.1806
0.166667	5.14819	0.833333	30.8891
0.166667	5.98422	1.66667	17.2486
0.166667	6.42424	2.33333	53.726
0.666667	26.753	1	17.3806
0.5	10.4284	1.33333	29.8771
0.166667	5.80821	2	18.3047
0.333333	5.63221	0.166667	6.07222
0.166667	6.07222	0.166667	5.72021
0.166667	6.38023	0.833333	15.4886
0.166667	9.59235	0.5	10.0764
0.166667	5.89622	0.166667	5.4122
0.166667	8.88833	0.333333	19.9767
0.833333	19.0967	0.166667	10.8244
0.166667	7.56828	0.166667	12.1004
0.833333	23.0568	0.166667	8.53631
1.5	112.16	3.5	42.3736
3.16667	70.0066	1	8.00829
0.333333	11.7484	0.166667	6.02822
1.16667	18.3927	0.166667	6.02822
0.166667	7.39227	0.166667	5.58821
0.333333	7.30427	0.166667	6.16023
1	21.9128	0.333333	11.3964
0.333333	20.3287	1.83333	26.313
0.166667	7.08426	0.166667	5.76421
0.166667	14.4325	0.5	10.5164
0.333333	6.86425	1.5	17.2926
0.166667	8.44831	0.333333	7.21627
0.333333	6.11622	0.166667	8.1843
0.333333	18.3487	0.833333	11.6604
0.166667	8.1403	1.33333	22.1768
0.166667	5.72021	0.666667	15.2246
0.166667	5.94022	0.166667	16.8086
0.833333	36.7414	0.166667	6.77625
0.5	13.3325	0.166667	21.9568
0.166667	21.9128	1.33333	14.3885
0.666667	12.1004	0.166667	11.8364
0.166667	4.97218	1.16667	12.0564
1.16667	12.3645	0.833333	18.2167
0.5	8.40431	0.333333	7.12826
2.66667	28.6451	2.16667	14.1245
0.166667	6.42424	2.16667	33.2212
0.166667	5.94022	1.16667	13.4205
0.5	9.85636	1.5	18.9647
0.166667	6.42424	0.333333	6.55624
0.166667	5.89622	1.16667	6.64424
1.5	37.9294	0.666667	12.6725
0.166667	6.11622	1	18.7887
0.333333	7.52428	0.166667	10.7364
1	17.8207	1.33333	37.2254
0.333333	17.6446	0.166667	7.52428
0.166667	9.28434	0.833333	13.1565
0.333333	9.63635	0.166667	7.21627
0.166667	6.16023	0.166667	5.58821
1	12.1004	3.33333	39.2054
0.166667	16.4566	0.333333	7.17226
0.333333	22.4848	1	14.8725
0.833333	23.3649	2.83333	101.292
0.166667	5.10419	0.5	13.6405
0.333333	15.3126	0.166667	11.4844
0.333333	15.8406	0.5	13.0245
0.333333	9.15234	0.166667	8.40431
0.833333	8.84433	0.5	14.6525
0.333333	6.73225	1.16667	22.3088
0.166667	8.2723	0.5	12.0564
1.16667	27.985	0.166667	7.52428
0.166667	6.24823	1	12.2324
0.833333	12.8485	0.333333	34.6293
0.166667	5.58821	0.166667	8.36031
0.166667	6.99626	1.5	15.2246
0.5	8.93233	0.166667	12.0564
0.333333	9.06433	0.166667	6.55624
0.166667	6.90825	0.833333	18.4807
0.166667	12.8485	0.666667	13.2005
0.333333	8.40431	0.333333	6.16023
0.166667	10.3844	0.333333	8.58032
1	12.8925	0.5	6.95226
1	15.1366	0.666667	6.77625
1.16667	21.2968	0.166667	8.0963
1.5	19.3607	0.5	33.2212
0.333333	10.2524	0.5	6.95226
1	21.0328	0.666667	17.8647
0.333333	6.24823	0.166667	6.46824
0.333333	7.12826	0.166667	6.11622
1	28.9971	3	177.899
0.166667	8.2723	3.33333	69.5666
1.16667	22.8808	2.33333	60.6342
0.166667	5.5002	1.66667	79.7749
0.666667	45.8937	1.33333	129.717
0.166667	4.97218	2	92.7114
1	10.8244	1	16.8526
1.16667	26.137	2.16667	62.2623
1	28.073	1	20.9448
0.333333	9.81236	1	16.2806
0.833333	14.1685	0.5	34.6293
0.166667	12.2765	0.333333	22.5728
0.166667	5.89622	0.666667	16.2366
0.166667	6.68825	0.333333	9.24034
0.333333	6.82025	0.833333	30.1411
0.166667	12.5405	0.166667	5.85222
0.166667	5.72021	0.166667	5.10419
0.666667	13.3325	1.16667	50.3819
0.166667	5.3242	0.166667	16.8086
0.333333	12.1444	0.333333	6.38023
0.5	33.6172	0.5	10.9564
0.833333	33.3532	0.166667	5.5002
0.5	12.4525	0.5	15.4446
0.333333	6.42424	0.166667	9.15234
0.166667	5.85222	0.166667	6.86425
0.5	7.70028	0.666667	31.1091
0.166667	4.92818	0.333333	6.07222
0.833333	23.4969	0.166667	7.39227
0.333333	12.1884	0.333333	16.7646
0.166667	5.3242	0.666667	27.589
0.833333	48.9298	0.166667	8.84433
0.666667	26.005	0.166667	5.4562
0.333333	7.56828	0.5	21.2968
0.166667	6.38023	0.166667	7.83229
0.166667	7.21627	0.333333	32.0332
0.333333	10.6484	0.333333	7.08426
0.166667	6.11622	0.833333	32.4732
0.166667	4.97218	0.5	9.24034
0.166667	6.90825	0.166667	10.7364
0.166667	5.3242	1.33333	29.4371
0.166667	8.97633	0.833333	38.9854
0.166667	5.23619	0.166667	5.5442
0.166667	10.2084	0.166667	7.12826
0.166667	5.72021	0.666667	24.2009
0.166667	6.46824	0.666667	11.2204
0.166667	5.98422	0.166667	5.28019
0.166667	4.75217	0.166667	8.44831
		1.66667	89.4113
		0.166667	8.75632
		1.66667	34.7173
		1.83333	26.357
		1.16667	60.2382
		0.666667	7.83229
		0.666667	12.2324
		0.166667	5.19219
		0.5	9.10833
		0.166667	6.68825
		0.333333	6.20423
		0.5	23.2769
		0.333333	10.6044
		0.166667	8.40431
		0.166667	5.80821
		4.5	284.514
		0.833333	22.9688
		0.166667	8.40431
		0.333333	6.42424
		0.166667	8.00829
		0.333333	8.2283
		0.333333	6.68825
		0.166667	8.97633
		0.833333	20.1967
		0.166667	8.2283
		0.166667	10.2964
		0.5	21.7808
		0.166667	9.41635
		0.166667	7.48027
		0.5	12.9805
		0.166667	8.49231
		0.5	13.0245
		0.166667	21.1648
		0.166667	46.0697
		0.666667	26.005
		1.16667	61.2503
		0.833333	15.4886
		0.166667	6.24823
		1	56.0581
		0.166667	7.70028
		0.166667	8.0523
		0.5	18.2167
		0.333333	9.06433
		0.166667	8.75632
		0.333333	6.51224
		0.166667	9.06433
		0.5	15.4886
		0.166667	6.42424
		0.166667	8.97633
		0.833333	30.8011
		0.5	17.9527
		0.166667	8.1843
		0.333333	7.70028
		0.333333	9.98837
		0.833333	26.049
		0.333333	9.02033
		1	23.0128
		0.166667	8.36031
		0.5	19.4487
		0.666667	58.5662
		0.5	11.7484
		1	48.7538
		0.166667	16.2366
		0.333333	46.5537
		0.166667	5.23619
		0.166667	21.2088
		0.166667	5.85222
		0.5	8.31631
		0.166667	5.63221
		0.333333	11.5284
		0.5	14.6965
		1.5	24.7729
		0.833333	18.8327
		0.333333	10.3404
		1.16667	205.488
		0.166667	5.85222
		0.166667	15.3566
		0.5	86.9032
		0.166667	37.3134
		0.166667	34.3653
		0.166667	20.3287
		0.666667	11.4844
		0.166667	6.02822
		3	451.545
		0.166667	6.33623
		0.166667	9.81236
		1.33333	35.3773
		1.16667	74.6267
		1.66667	104.196
		0.333333	23.5849
		0.166667	8.00829
		0.166667	10.1204
		1.33333	88.3992
		0.5	10.5164
		0.833333	41.7135
		0.166667	7.43627
		0.166667	8.93233
		0.166667	5.19219
		0.5	10.1644
		0.333333	68.8625
		0.166667	12.1884
		0.666667	32.1212
		0.333333	10.6924
		0.333333	74.5387
		0.166667	9.85636
		0.166667	11.6604
		0.666667	54.43
		0.833333	19.8007
		0.166667	13.5525
		0.166667	7.34827
		0.166667	13.1125
		0.166667	9.85636
		0.333333	15.1806
		0.833333	59.5782
		0.166667	12.4965
		0.166667	7.30427
		0.5	8.84433
		0.333333	11.8804
		0.166667	17.0286
		0.166667	5.94022
		0.5	23.6289
		0.166667	5.5002
		0.166667	7.04026
		0.666667	20.6808
		0.166667	13.3765
		0.333333	26.665
		0.166667	5.63221
		0.666667	10.6044
		0.166667	12.8485
		0.666667	39.8215
		0.166667	24.5529
		1.16667	10.5164
		0.333333	18.1287
		0.666667	71.4146
		0.666667	49.6338
		0.5	11.7924
		0.166667	86.1992
		0.166667	9.90036
		0.166667	14.4765
		0.166667	13.2885
		0.166667	29.0411
		1.5	51.7899
		2.83333	98.6076
		0.666667	21.8248
		0.166667	18.9647
		0.166667	33.7932
		0.666667	45.8937
		0.5	13.7725
		0.5	36.0373
		0.166667	56.0141
		0.166667	8.0523
		0.5	23.4089
		0.666667	24.0249
		0.833333	214.244
		0.166667	15.4886
		1	41.4055
		0.166667	12.1004
		0.333333	8.88833
		0.166667	69.3906
		0.666667	16.8086
		0.5	24.2009
		1.66667	420.875
		0.166667	13.4205
		0.166667	15.1806
		0.166667	12.6725
		0.166667	5.94022
		0.333333	9.46035
		0.5	11.7484
		0.666667	27.193
		0.333333	5.5002
		0.166667	7.26027
		0.166667	5.89622
		0.166667	5.80821
		2.16667	138.781
		0.166667	5.10419
		0.333333	7.74428
		1.83333	176.798
		0.5	28.557
		0.166667	8.66832
		0.666667	10.7804
		1.33333	209.712
		0.333333	14.0805
		0.333333	5.28019
		0.166667	5.5442
		0.166667	13.6845
		0.166667	5.98422
		0.333333	29.0411
		0.666667	59.5342
		0.166667	12.5405
		0.166667	8.88833
		0.5	54.562
		0.166667	6.64424
		0.166667	6.16023
		0.166667	5.23619
		0.166667	9.72436
		0.333333	9.68036
		0.5	25.8289
		0.333333	16.7646
		0.166667	8.84433
		0.666667	39.2934
		0.166667	37.2694
		0.166667	5.76421
		0.5	42.0655
		0.333333	15.8846
		1.5	256.441
		0.5	15.0046
		1.33333	13.6405
		0.166667	9.85636
		0.5	17.4686
		1.16667	19.5367
		0.166667	18.2167
		0.833333	76.6948
		0.166667	9.19634
		0.166667	7.78829
		0.333333	14.1245
		0.166667	6.07222
		0.333333	47.2577
		0.166667	27.765
		0.666667	63.8463
		0.166667	9.50435
		0.166667	5.85222
		0.166667	8.66832
		0.5	21.4728
		0.166667	6.46824
		0.166667	5.5002
		0.166667	12.8925
		0.333333	28.6451
		0.333333	40.3495
		0.833333	60.3262
		0.166667	12.3645
		0.833333	77.8829
		0.5	57.5101
		0.333333	25.961
		0.166667	6.20423
		0.333333	16.9846
		0.666667	42.3736
		0.5	10.6484
		0.166667	24.2889
		0.5	6.46824
		0.833333	18.3927
		0.166667	4.92818
		0.666667	15.7526
		0.166667	9.81236
		0.166667	11.6164
		0.166667	12.7165
		0.166667	23.9809
		0.166667	17.4246
		0.5	10.8684
		0.333333	17.1606
		0.166667	7.56828
		0.666667	27.281
		0.333333	11.0884
		0.166667	7.04026
		0.166667	5.63221
		0.333333	16.4566
		0.666667	51.9659
		0.166667	10.2964
		0.333333	10.3844
		0.166667	43.7816
		0.333333	9.19634
		0.333333	28.425
		0.166667	13.9485
		0.166667	5.19219
		0.166667	5.58821
		0.166667	5.5442
		0.166667	5.14819
		0.166667	18.5247
