# Supplementary material for: Cortical waves mediate the cellular response to electric fields
Source: eLife. 2022 Mar 23;11:e73198. doi: 10.7554/eLife.73198 (PMC8942472; doi:10.7554/eLife.73198)
Supplement: Figure 2—source data 4. — Related to Figure 2f. [file elife-73198-fig2-data4.xlsx]

## Sheet: Sheet1
Figure 2 - Source Data 4
Figure 2f. Wave propagation speed
P-value (two-sample t-test): 0.017
no EF	20 V/cm EF
8.11349	10.7182
10.9179	15.7098
12.0902	15.2505
9.42956	11.0026
10.0433	10.9217
13.7715	10.412
10.5163	6.92611
7.94933	11.8416
9.92607	10.8677
10.3399	10.0672
13.3166	7.26476
8.32818	9.03612
10.5822	8.37905
8.33995	9.27265
9.52535	12.4363
8.21801	10.3387
7.65715	6.89836
10.304	10.7113
15.5518	8.07246
10.144	8.90896
7.01453	12.711
10.346	7.04629
12.0693	11.2533
9.68769	7.34044
12.0602	14.1943
8.06868	13.9489
11.2184	9.26985
7.15647	9.58504
10.0496	8.40218
8.27445	9.03875
10.9487	8.86084
9.54646	10.1364
8.68689	11.4805
11.2169	10.6477
13.9926	10.7895
8.35791	10.1831
15.2715	10.4807
10.3624	11.6213
11.4463	16.1578
12.5621	10.835
10.9507	14.6711
7.30382	8.72062
4.86901	12.8718
9.67441	8.63093
8.42631	12.8843
6.70745	11.956
10.8109	13.4566
11.6086	9.68663
9.02413	11.7337
11.4742	10.063
12.8842	19.4743
12.801	10.546
12.7384	13.0045
8.82398	14.5689
12.795	7.40306
14.555	12.5955
12.0032	11.2459
4.20338	11.7742
15.6556	5.86819
8.77273	4.64377
11.8585	7.57037
15.289	12.0228
6.77304	12.5333
6.84514	16.8867
5.76166	10.6851
10.626	15.5751
15.8105	9.67828
10.9502	9.80785
7.03546	7.34534
8.51536	11.4948
3.27087	11.1883
9.45205	11.4942
15.0173	11.9529
12.4037	10.7982
9.99732	8.38445
13.8332	13.4107
12.5154	13.1456
14.0247	11.2441
11.5817	11.7792
9.33301	10.802
15.4864	14.105
14.4651	9.28807
10.356	12.4023
10.2812	14.0944
8.38012	5.42085
13.0269	14.0575
10.9277	14.8742
10.7572	9.45346
8.51752	3.68086
12.114	8.74411
11.301	7.40056
11.3126	11.4021
11.2847	5.17672
12.2695	9.09258
3.04839	9.06307
16.5475	7.74215
9.59244	6.96694
14.4146	4.39508
12.391	11.9927
16.6338	6.55992
11.6862	9.08343
11.2725	9.58785
7.99991	10.11
11.0588	10.5076
3.60689	6.72073
7.75113	6.34485
7.7594	7.7376
4.96057	9.6902
10.5696	8.42582
8.80582	5.94448
8.072	9.53695
5.0692	8.6264
7.19276	9.1246
7.78734	5.43311
9.78477	11.0115
4.37949	7.22138
2.82714	12.8665
8.02047	9.04189
7.01317	15.7551
8.49295	11.4983
5.04513	8.27576
8.08969	7.77037
5.68358	6.45378
7.61427	4.19717
10.4728
7.08655
3.63248
10.5715
5.12443
8.67501
5.62993
3.50922
6.35349
9.5628
6.39857
11.2494
7.00992
7.99257
8.71771
4.64365
7.44956
8.77425
12.6985
6.33007
4.84465
5.90262
7.98463
5.45379
3.27188
7.13015
9.72091
4.81485
8.50441
8.63846
7.65551
7.78627
5.7754
5.40713
7.04473
8.09314
10.872
5.03554
