# Supplementary material for: Cortical waves mediate the cellular response to electric fields
Source: eLife. 2022 Mar 23;11:e73198. doi: 10.7554/eLife.73198 (PMC8942472; doi:10.7554/eLife.73198)
Supplement: Figure 3—source data 1. — Related to Figure 3c. [file elife-73198-fig3-data1.xlsx]

## Sheet: Sheet1
Figure 3 - Source Data 1
Figure 3c : Wave duration on flat surfaces / ridged surfaces
Note : the distribution in the plot is weighted by wave area
Flat surfaces			Ridged surfaces
Duration (min)	Area (µm^2)		Duration (min)	Area (µm^2)
4.16667	160.342		1.5	117.396
0.5	40.8335		1.66667	43.7816
3.83333	207.028		0.333333	13.3765
1.66667	256.969		1	56.7621
0.833333	28.557		1	11.7044
0.833333	12.9805		0.333333	8.2723
0.166667	9.10833		0.166667	18.7447
7.83333	563.221		0.166667	8.71232
3	129.057		0.333333	8.58032
1.16667	53.77		1.5	13.3325
1	19.0967		0.833333	10.9124
0.166667	15.4446		1.5	120.652
0.166667	12.9365		0.166667	5.3682
0.333333	28.557		0.166667	6.46824
0.833333	69.1705		0.333333	10.7804
0.333333	12.8485		0.666667	13.1125
0.166667	11.9244		0.166667	5.98422
0.166667	14.8285		0.166667	5.85222
2.66667	30.0971		0.166667	5.01618
0.333333	30.8451		0.333333	17.5566
0.166667	13.7285		0.333333	28.161
0.166667	10.2524		0.333333	6.68825
0.5	19.4487		0.166667	8.00829
0.5	11.4404		1.83333	85.4071
0.333333	11.6604		0.166667	7.83229
0.166667	14.3445		0.333333	18.6567
0.333333	14.3445		1	17.2046
0.166667	11.3964		0.166667	7.65628
0.166667	9.54835		0.166667	7.96429
0.5	32.6052		0.333333	5.72021
1.66667	36.2133		0.833333	16.9846
0.333333	11.0004		2	76.4308
1.16667	36.4333		0.166667	5.76421
1	10.1644		0.666667	13.2885
5.16667	248.565		0.166667	5.4122
0.166667	9.50435		0.166667	5.5002
0.5	11.3084		0.833333	9.76836
0.333333	9.24034		0.666667	16.4566
0.5	18.2167		0.166667	4.88418
0.5	15.2686		1	13.4645
1	162.19		0.666667	8.53631
1	14.0805		2.16667	42.1535
0.5	11.5284		2.16667	52.6699
0.166667	12.2765		1	11.1324
0.666667	19.2727		0.333333	7.39227
1.83333	64.5504		0.666667	13.3325
0.5	14.1685		0.333333	13.3765
0.5	19.4487		0.833333	13.9485
0.5	10.0324		0.5	13.3765
0.166667	11.4404		0.166667	17.5126
2.16667	334.764		2.66667	41.2735
1.16667	22.4408		3.5	63.8463
0.166667	10.7364		0.666667	8.0963
0.166667	10.9124		1	12.0124
0.333333	12.3645		0.333333	5.80821
0.333333	24.2009		0.166667	8.44831
0.5	11.7924		1	14.0805
0.166667	8.2283		0.666667	12.4965
0.166667	11.7484		0.666667	15.7966
0.333333	12.0124		0.5	12.7605
1.16667	19.8447		0.833333	8.1843
0.5	12.1884		0.166667	8.97633
0.166667	12.7605		0.333333	7.30427
0.166667	9.19634		2.5	22.0888
3.16667	267.354		2.33333	51.8339
1.16667	60.3702		2	38.0174
0.166667	8.97633		0.333333	6.42424
0.833333	45.9817		0.666667	9.15234
0.666667	18.2167		0.333333	18.7447
0.166667	10.5604		0.166667	7.43627
0.333333	39.9095		0.5	6.86425
0.166667	11.1324		0.333333	13.1125
0.333333	45.8497		1.33333	46.5537
0.333333	16.4126		0.5	7.26027
0.166667	14.2565		0.166667	6.86425
1	48.0498		3.66667	53.462
0.166667	9.50435		0.833333	19.5807
0.166667	25.5209		0.166667	5.5002
0.166667	13.7725		0.166667	7.48027
0.333333	14.8285		0.5	9.98837
0.166667	12.8045		1.16667	13.9925
0.833333	50.6899		0.166667	6.90825
0.666667	16.0166		1.5	11.7924
0.666667	15.2686		1.16667	30.8011
0.333333	13.5965		0.666667	6.24823
0.5	13.9045		1.16667	12.6725
0.166667	70.4906		0.5	7.52428
0.5	31.5052		0.166667	14.3885
2.33333	91.3034		1.5	26.445
1.16667	19.9327		0.666667	8.53631
1.16667	19.5367		0.833333	12.9805
2.5	61.8663		1.83333	9.54835
3.83333	69.0825		0.166667	8.53631
0.166667	15.5766		0.833333	12.8925
0.166667	11.6604		0.333333	15.1806
0.333333	18.7887		0.833333	30.8891
0.166667	17.3806		1.66667	17.2486
1.5	40.8335		1	17.3806
0.333333	12.8485		1.33333	29.8771
0.166667	12.3205		0.166667	6.07222
0.333333	13.2885		0.166667	5.72021
0.666667	23.8049		0.833333	15.4886
0.166667	14.2565		0.5	10.0764
0.166667	8.40431		0.166667	5.4122
1	23.4969		0.333333	19.9767
0.666667	22.3528		0.166667	10.8244
1.83333	81.095		0.166667	12.1004
0.166667	12.3645		0.166667	8.53631
3.83333	92.4034		3.5	225.992
0.166667	18.8327		5.66667	469.805
0.166667	11.3524		2	49.2378
2.33333	57.1141		1.5	15.5326
0.166667	10.8244		0.333333	7.78829
1.33333	47.8298		0.333333	17.3806
3.16667	126.857		0.166667	5.28019
4.33333	81.447		0.166667	4.97218
0.5	17.3806		0.166667	11.6164
0.166667	10.8244		0.166667	28.7771
0.333333	10.6044		1.16667	64.4624
0.166667	21.1208		0.5	53.33
2.66667	62.8783		0.166667	7.08426
0.166667	11.2644		0.166667	9.90036
0.166667	10.8684		0.166667	5.4122
0.333333	16.0166		0.166667	19.0087
0.333333	17.5566		0.5	82.723
0.166667	11.0444		0.166667	7.78829
0.166667	18.5687		0.333333	12.8925
0.833333	25.1689		0.333333	29.0411
1.33333	29.4811		0.166667	21.6928
0.333333	10.0764		0.166667	9.15234
0.166667	8.31631		0.333333	5.58821
0.166667	10.7364		1.33333	39.1174
0.5	14.4765		0.333333	29.7451
0.333333	9.94437		0.333333	16.8086
0.333333	14.2565		0.166667	6.07222
2	60.6782		0.333333	23.0568
0.166667	9.46035		0.166667	6.07222
2.66667	64.9904		0.166667	6.29223
0.333333	18.3047		0.166667	9.32834
1.16667	34.3653		0.666667	61.4703
5.33333	112.204		0.166667	9.90036
0.5	20.8128		0.166667	8.1843
1	28.161		0.666667	30.8451
4.83333	110.092		0.5	30.1411
0.333333	14.5645		1	8.88833
0.666667	20.1967		0.5	13.6845
0.166667	9.59235		0.166667	10.2964
0.5	31.6372		3.5	197.127
0.333333	11.6164		1.5	48.8418
0.166667	13.5965		0.666667	36.7854
0.166667	15.7526		0.166667	5.76421
0.166667	204.96		0.166667	8.1843
1.16667	49.1938		0.166667	6.55624
0.833333	30.1411		0.5	56.4981
5	213.804		0.166667	22.7488
0.333333	21.7368		0.333333	13.3325
3	111.456		0.833333	45.8057
0.666667	24.6849		0.166667	10.8684
0.5	18.3927		0.166667	5.28019
1.16667	61.0302		0.166667	13.3765
1.33333	32.6052		0.166667	9.63635
0.166667	14.3885		0.333333	15.7086
0.166667	43.2536		0.166667	6.68825
0.5	47.4777		0.166667	16.8086
7.5	251.161		0.166667	19.7567
1.5	13.1125		0.166667	7.04026
0.833333	27.677		0.166667	33.7492
0.5	97.5076		1	33.2652
1	44.1776		0.5	17.3806
2.5	133.193		0.333333	10.0324
0.833333	40.3495		0.166667	18.8767
2	32.3852		0.166667	72.1187
1.5	32.2532		0.333333	12.8045
1.33333	46.5097		1.33333	65.1224
0.166667	11.2644		0.166667	9.85636
1.33333	19.1407		0.833333	41.8895
0.333333	13.2445		0.166667	21.6928
0.833333	96.8036		0.166667	46.5977
4	108.728		1.33333	33.1772
8.16667	267.31		0.333333	9.46035
0.333333	32.2532		0.666667	99.8837
0.333333	27.809		3	274.482
1.16667	44.4416		0.5	19.6247
0.5	32.9572		0.166667	5.76421
0.5	32.6492		0.333333	19.4487
0.666667	43.6496		0.166667	5.14819
0.333333	36.3453		3.33333	67.9385
5.33333	161.134		0.166667	6.20423
0.333333	61.2062		0.5	7.43627
0.166667	10.6924		0.5	18.5687
2.83333	62.4823		0.333333	74.2307
6.33333	316.988		0.333333	21.8248
0.666667	20.0207		0.166667	7.92029
0.166667	12.8925		1.16667	229.028
0.166667	9.54835		0.166667	10.8244
1	73.4827		0.166667	8.36031
0.5	21.7368		0.166667	8.71232
0.5	23.5409		0.166667	18.7007
0.333333	80.2149		0.166667	11.4844
0.833333	36.5213		0.166667	11.3084
0.166667	13.2005		0.166667	63.2303
0.166667	10.3404		0.166667	8.40431
0.166667	16.2366		0.166667	5.72021
1.33333	33.9692		0.833333	34.6293
0.166667	12.4085		0.166667	6.02822
0.666667	26.885		0.166667	22.5288
5.5	226.872		2.5	205.972
0.666667	53.902		0.166667	12.0564
0.833333	55.31		0.166667	12.5845
0.5	100.456		0.166667	7.87629
0.333333	18.7447		0.166667	9.98837
10.1667	276.55		0.166667	18.2167
1.5	79.9509		0.666667	32.8252
1	36.4333		0.166667	9.90036
2.33333	62.3943		1	23.8489
0.333333	27.545		0.166667	10.8684
0.833333	41.2295		0.166667	5.19219
0.166667	12.5405		0.5	7.34827
0.5	13.9925		0.166667	5.67621
3.16667	113.128		0.166667	8.2283
2	67.0145		0.333333	25.8289
0.333333	30.6691		0.333333	8.66832
0.166667	14.3885		0.166667	12.3205
1	32.6932		0.166667	9.50435
0.166667	9.10833		0.833333	27.809
0.666667	38.3254		0.166667	6.16023
0.833333	31.5052		0.333333	13.2885
0.333333	15.6206		0.166667	5.06019
1.66667	70.0506		2.16667	39.9095
1.83333	25.5209		0.166667	5.58821
0.166667	10.6924		0.333333	24.3769
2	31.7692		2.16667	143.885
0.166667	13.3765		0.166667	20.1087
0.333333	21.4728		1.5	38.9414
0.333333	17.1166		0.333333	12.3205
0.333333	12.6725		0.166667	5.80821
0.166667	11.7484		0.166667	5.4562
0.333333	98.5636		0.333333	8.49231
0.166667	11.9684		0.166667	11.3964
0.333333	26.401		0.166667	30.4491
0.5	29.7451		0.166667	22.3528
1.83333	47.2137		0.166667	38.4574
0.166667	12.1004		0.5	33.2212
0.5	29.6571		0.166667	24.5529
0.166667	10.6484		0.166667	16.3686
2	144.853		0.166667	8.2283
1.16667	30.5371		0.166667	5.3242
0.833333	51.5699		0.166667	7.61228
0.5	12.3205		0.166667	6.42424
0.166667	11.1764		1.5	60.8982
3.16667	251.645		0.5	10.0764
0.5	34.8493		0.333333	15.2686
6.16667	460.697		0.166667	7.39227
0.166667	8.71232		0.333333	7.87629
0.166667	11.7484		0.166667	6.82025
0.666667	21.2968		0.666667	40.1295
0.166667	21.8248		1.16667	62.7463
0.833333	70.6666		0.166667	20.5488
0.166667	18.6127		1	26.489
1	21.4288		0.166667	8.00829
2	97.9916		0.166667	9.41635
0.333333	19.1407		0.166667	6.46824
0.166667	15.0486		0.166667	4.88418
8.66667	415.815		0.333333	11.7924
0.333333	22.6608		0.333333	12.6725
0.166667	11.0004		0.166667	5.67621
1.5	103.272		2	19.8007
0.166667	25.7409		1.5	117.396
1.66667	58.6982		1.66667	43.7816
0.833333	51.1299		0.333333	13.3765
0.166667	12.1004		1	56.7621
0.166667	41.5375		1	11.7044
2	120.96		0.333333	8.2723
0.333333	35.9053		0.166667	18.7447
8	257.497		0.166667	8.71232
1	49.1058		0.333333	8.58032
2.5	125.053		1.5	13.3325
0.5	34.2773		0.833333	10.9124
0.333333	20.9448		1.5	120.652
1	37.2694		0.166667	5.3682
0.833333	54.166		0.166667	6.46824
2.33333	100.456		0.333333	10.7804
0.833333	34.9373		0.666667	13.1125
1.66667	114.404		0.166667	5.98422
0.666667	25.0369		0.166667	5.85222
0.166667	12.7605		0.166667	5.01618
0.5	20.6808		0.333333	17.5566
0.833333	35.3333		0.333333	28.161
6	406.795		0.333333	6.68825
0.166667	16.6766		0.166667	8.00829
1.33333	61.7343		1.83333	85.4071
0.833333	52.4059		0.166667	7.83229
1.16667	99.3557		0.333333	18.6567
3	226.828		1	17.2046
6.33333	329.836		0.166667	7.65628
0.166667	22.0448		0.166667	7.96429
1.66667	62.5263		0.333333	5.72021
1.66667	39.3814		0.833333	16.9846
0.333333	13.0685		2	76.4308
0.166667	13.9045		0.166667	5.76421
0.166667	13.8605		0.666667	13.2885
3.83333	165.27		0.166667	5.4122
0.166667	24.4209		0.166667	5.5002
0.833333	45.8937		0.833333	9.76836
0.666667	83.8671		0.666667	16.4566
0.166667	25.0369		0.166667	4.88418
0.166667	16.6326		1	13.4645
0.333333	30.7571		0.666667	8.53631
0.333333	69.5666		2.16667	42.1535
5.33333	334.544		2.16667	52.6699
1	104.68		1	11.1324
0.833333	23.9809		0.333333	7.39227
3.33333	266.21		0.666667	13.3325
0.5	99.5757		0.333333	13.3765
1.16667	106.88		0.833333	13.9485
5	146.613		0.5	13.3765
2.66667	48.9298		0.166667	17.5126
0.166667	11.6604		2.66667	41.2735
0.166667	13.6405		3.5	63.8463
1	31.2411		0.666667	8.0963
7.83333	427.872		1	12.0124
0.166667	10.4724		0.333333	5.80821
0.166667	11.7924		0.166667	8.44831
0.166667	9.02033		1	14.0805
0.666667	50.5139		0.666667	12.4965
2.83333	324.556		0.666667	15.7966
0.166667	9.32834		0.5	12.7605
0.166667	9.02033		0.833333	8.1843
0.166667	37.3134		0.166667	8.97633
0.333333	23.8929		0.333333	7.30427
0.5	145.865		2.5	22.0888
2.33333	125.229		2.33333	51.8339
0.333333	26.005		2	38.0174
0.333333	41.2295		0.333333	6.42424
0.166667	11.0884		0.666667	9.15234
0.166667	13.8165		0.333333	18.7447
5.33333	162.102		0.166667	7.43627
1	59.8862		0.5	6.86425
0.166667	50.9979		0.333333	13.1125
0.166667	22.8808		1.33333	46.5537
0.5	19.5807		0.5	7.26027
1.33333	84.7031		0.166667	6.86425
0.166667	14.8285		3.66667	53.462
2.5	69.6986		0.833333	19.5807
0.166667	25.917		0.166667	5.5002
0.166667	16.1046		0.166667	7.48027
0.5	16.6326		0.5	9.98837
3.66667	373.926		1.16667	13.9925
0.166667	9.15234		0.166667	6.90825
0.166667	19.6687		1.5	11.7924
0.5	40.7015		1.16667	30.8011
1	50.0738		0.666667	6.24823
0.333333	12.9805		1.16667	12.6725
0.666667	21.9568		0.5	7.52428
0.666667	95.3075		0.166667	14.3885
0.333333	59.3582		1.5	26.445
			0.666667	8.53631
			0.833333	12.9805
			1.83333	9.54835
			0.166667	8.53631
			0.833333	12.8925
			0.333333	15.1806
			0.833333	30.8891
			1.66667	17.2486
			1	17.3806
			1.33333	29.8771
			0.166667	6.07222
			0.166667	5.72021
			0.833333	15.4886
			0.5	10.0764
			0.166667	5.4122
			0.333333	19.9767
			0.166667	10.8244
			0.166667	12.1004
			0.166667	8.53631
			4	68.4665
			1.5	102.744
			1.66667	27.765
			1	39.0734
			1.16667	30.5811
			2	46.2017
			1	12.0564
			1.16667	52.2739
			1.33333	20.5928
			0.666667	15.2686
			3	177.899
			1.16667	14.2565
			0.833333	92.2714
			1	27.941
			0.166667	7.30427
			0.5	8.00829
			0.666667	15.4446
			0.833333	38.1054
			0.166667	5.76421
			0.333333	9.15234
			3.33333	69.5666
			0.5	7.30427
			2.33333	60.6342
			1.66667	79.7749
			0.833333	16.3686
			0.166667	15.4446
			0.333333	12.7165
			0.166667	5.3242
			1.16667	49.6778
			0.166667	7.08426
			1	24.5969
			0.166667	6.11622
			0.166667	6.77625
			0.333333	13.0685
			0.166667	9.68036
			1	35.7293
			0.5	10.2964
			0.833333	40.4375
			0.166667	11.6604
			0.333333	13.8605
			0.166667	10.6044
			0.166667	6.86425
			0.5	14.7845
			0.333333	19.8887
			0.333333	6.77625
			0.333333	16.3686
			0.166667	5.67621
			0.166667	8.93233
			0.166667	16.6326
			1.33333	129.717
			0.166667	8.71232
			0.166667	8.49231
			2	92.7114
			1	16.8526
			2.16667	62.2623
			1	20.9448
			0.166667	5.94022
			0.166667	28.513
			0.166667	23.7169
			0.5	12.8925
			1	16.2806
			0.333333	11.9244
			0.166667	13.5085
			0.166667	7.08426
			0.5	34.6293
			0.333333	22.5728
			0.666667	16.2366
			0.333333	9.24034
			0.833333	30.1411
			0.166667	5.85222
			0.166667	5.10419
			1.16667	50.3819
			0.166667	16.8086
			0.333333	6.38023
			0.5	10.9564
			0.166667	5.5002
			0.5	15.4446
			0.166667	9.15234
			0.166667	6.86425
			0.666667	31.1091
			0.333333	6.07222
			0.166667	7.39227
			0.333333	16.7646
			0.666667	27.589
			0.166667	8.84433
			0.166667	5.4562
			0.5	21.2968
			0.166667	7.83229
			0.333333	32.0332
			0.333333	7.08426
			0.833333	32.4732
			0.5	9.24034
			0.166667	10.7364
			1.33333	29.4371
			0.833333	38.9854
			0.166667	5.5442
			0.166667	7.12826
			0.666667	24.2009
			0.666667	11.2204
			0.166667	5.28019
			0.166667	8.44831
			1.66667	89.4113
			0.166667	8.75632
			1.66667	34.7173
			1.83333	26.357
			1.16667	60.2382
			0.666667	7.83229
			0.666667	12.2324
			0.166667	5.19219
			0.5	9.10833
			0.166667	6.68825
			0.333333	6.20423
			0.5	23.2769
			0.333333	10.6044
			0.166667	8.40431
			0.166667	5.80821
			4.5	284.514
			0.833333	22.9688
			0.166667	8.40431
			0.333333	6.42424
			0.166667	8.00829
			0.333333	8.2283
			0.333333	6.68825
			0.166667	8.97633
			0.833333	20.1967
			0.166667	8.2283
			0.166667	10.2964
			0.5	21.7808
			0.166667	9.41635
			0.166667	7.48027
			0.5	12.9805
			0.166667	8.49231
			0.5	13.0245
			0.166667	21.1648
			0.166667	46.0697
			0.666667	26.005
			1.16667	61.2503
			0.833333	15.4886
			0.166667	6.24823
			1	56.0581
			0.166667	7.70028
			0.166667	8.0523
			0.5	18.2167
			0.333333	9.06433
			0.166667	8.75632
			0.333333	6.51224
			0.166667	9.06433
			0.5	15.4886
			0.166667	6.42424
			0.166667	8.97633
			0.833333	30.8011
			0.5	17.9527
			0.166667	8.1843
			0.333333	7.70028
			0.333333	9.98837
			0.833333	26.049
			0.333333	9.02033
			1	23.0128
			0.166667	8.36031
			0.5	19.4487
			0.666667	58.5662
			0.5	11.7484
			1	48.7538
			0.166667	16.2366
			0.333333	46.5537
			0.166667	5.23619
			0.166667	21.2088
			0.166667	5.85222
			0.5	8.31631
			0.166667	5.63221
			0.333333	11.5284
			0.5	14.6965
			1.5	24.7729
			0.833333	18.8327
			0.333333	10.3404
			1.16667	205.488
			0.166667	5.85222
			0.166667	15.3566
			0.5	86.9032
			0.166667	37.3134
			0.166667	34.3653
			0.166667	20.3287
			0.666667	11.4844
			0.166667	6.02822
			3	451.545
			0.166667	6.33623
			0.166667	9.81236
			1.33333	35.3773
			1.16667	74.6267
			1.66667	104.196
			0.333333	23.5849
			0.166667	8.00829
			0.166667	10.1204
			1.33333	88.3992
			0.5	10.5164
			0.833333	41.7135
			0.166667	7.43627
			0.166667	8.93233
			0.166667	5.19219
			0.5	10.1644
			0.333333	68.8625
			0.166667	12.1884
			0.666667	32.1212
			0.333333	10.6924
			0.333333	74.5387
			0.166667	9.85636
			0.166667	11.6604
			0.666667	54.43
			0.833333	19.8007
			0.166667	13.5525
			0.166667	7.34827
			0.166667	13.1125
			0.166667	9.85636
			0.333333	15.1806
			0.833333	59.5782
			0.166667	12.4965
			0.166667	7.30427
			0.5	8.84433
			0.333333	11.8804
			0.166667	17.0286
			0.166667	5.94022
			0.5	23.6289
			0.166667	5.5002
			0.166667	7.04026
			0.666667	20.6808
			0.166667	13.3765
			0.333333	26.665
			0.166667	5.63221
			0.666667	10.6044
			0.166667	12.8485
			0.666667	39.8215
			0.166667	24.5529
			1.16667	10.5164
			0.333333	18.1287
			0.666667	71.4146
			0.666667	49.6338
			0.5	11.7924
			0.166667	86.1992
			0.166667	9.90036
			0.166667	14.4765
			0.166667	13.2885
			0.166667	29.0411
			1.5	51.7899
			2.83333	98.6076
			0.666667	21.8248
			0.166667	18.9647
			0.166667	33.7932
			0.666667	45.8937
			0.5	13.7725
			0.5	36.0373
			0.166667	56.0141
			0.166667	8.0523
			0.5	23.4089
			0.666667	24.0249
			0.833333	214.244
			0.166667	15.4886
			1	41.4055
			0.166667	12.1004
			0.333333	8.88833
			0.166667	69.3906
			0.666667	16.8086
			0.5	24.2009
			1.66667	420.875
			0.166667	13.4205
			0.166667	15.1806
			0.166667	12.6725
			0.166667	5.94022
			0.333333	9.46035
			0.5	11.7484
			0.666667	27.193
			0.333333	5.5002
			0.166667	7.26027
			0.166667	5.89622
			0.166667	5.80821
			2.16667	138.781
			0.166667	5.10419
			0.333333	7.74428
			1.83333	176.798
			0.5	28.557
			0.166667	8.66832
			0.666667	10.7804
			1.33333	209.712
			0.333333	14.0805
			0.333333	5.28019
			0.166667	5.5442
			0.166667	13.6845
			0.166667	5.98422
			0.333333	29.0411
			0.666667	59.5342
			0.166667	12.5405
			0.166667	8.88833
			0.5	54.562
			0.166667	6.64424
			0.166667	6.16023
			0.166667	5.23619
			0.166667	9.72436
			0.333333	9.68036
			0.5	25.8289
			0.333333	16.7646
			0.166667	8.84433
			0.666667	39.2934
			0.166667	37.2694
			0.166667	5.76421
			0.5	42.0655
			0.333333	15.8846
			1.5	256.441
			0.5	15.0046
			1.33333	13.6405
			0.166667	9.85636
			0.5	17.4686
			1.16667	19.5367
			0.166667	18.2167
			0.833333	76.6948
			0.166667	9.19634
			0.166667	7.78829
			0.333333	14.1245
			0.166667	6.07222
			0.333333	47.2577
			0.166667	27.765
			0.666667	63.8463
			0.166667	9.50435
			0.166667	5.85222
			0.166667	8.66832
			0.5	21.4728
			0.166667	6.46824
			2	152.026
			0.166667	5.5002
			0.166667	12.8925
			0.333333	28.6451
			0.333333	40.3495
			0.833333	60.3262
			0.166667	12.3645
			0.833333	77.8829
			0.5	57.5101
			0.333333	25.961
			0.166667	6.20423
			0.333333	16.9846
			0.666667	42.3736
			0.5	10.6484
			0.166667	24.2889
			0.5	6.46824
			0.833333	18.3927
			0.166667	4.92818
			0.666667	15.7526
			0.166667	9.81236
			0.166667	11.6164
			1.33333	24.0249
			0.166667	12.7165
			0.166667	23.9809
			0.166667	17.4246
			0.5	10.8684
			0.333333	17.1606
			0.166667	7.56828
			0.666667	27.281
			1.16667	17.9527
			0.333333	11.0884
			0.166667	7.04026
			0.166667	5.63221
			0.333333	16.4566
			0.666667	51.9659
			0.166667	10.2964
			0.333333	10.3844
			0.166667	43.7816
			0.666667	11.5284
			0.666667	17.2046
			0.333333	9.19634
			1	43.0336
			0.333333	28.425
			0.166667	13.9485
			0.166667	5.19219
			0.5	11.3524
			0.666667	11.4844
			0.333333	7.87629
			0.5	30.7131
			0.833333	20.6368
			0.166667	5.58821
			0.166667	5.5442
			0.166667	5.14819
			0.166667	18.5247
			0.166667	7.43627
			0.333333	14.7845
			0.333333	30.0091
			0.166667	11.1764
			0.166667	6.16023
			0.5	78.9389
			0.333333	20.5928
			0.166667	8.1843
			0.333333	7.17226
			0.166667	14.2125
			0.166667	20.5048
