# Supplementary material for: Cortical waves mediate the cellular response to electric fields
Source: eLife. 2022 Mar 23;11:e73198. doi: 10.7554/eLife.73198 (PMC8942472; doi:10.7554/eLife.73198)
Supplement: Figure 4—figure supplement 1—source data 1. — Related to Figure 4—figure supplement 1. [file elife-73198-fig4-figsupp1-data1.xlsx]

## Sheet: Sheet1
Fig. 4- figure supplement 1 - source data 1
Wave position relative to the center of microscopic field of view vs. wave area
No EF			20 V/cm EF
Location (µm)	Area (µm^2)		Location (µm)	Area (µm^2)
34.9197	21.8688		-21.2231	34.1013
33.3013	16.0606		-24.0233	6.20423
24.8754	3.60813		-15.5407	5.58821
-51.0642	11.5284		-14.12	4.75217
21.7879	10.1644		-7.14387	4.66417
-45.1182	6.95226		0.0131104	3.52013
32.3543	3.30012		-18.3261	10.2524
-40.1722	6.64424		-17.8091	33.6612
-51.1316	5.5442		-4.52764	3.91614
-33.4656	4.40016		-11.2106	18.9647
-43.3496	7.70028		-32.0073	26.709
23.063	3.30012		45.151	25.1689
-37.0001	5.67621		45.9652	7.30427
21.9586	17.9527		52.7326	2.94811
20.1611	17.3366		-20.4205	4.66417
-51.6931	11.9244		-30.2224	9.15234
35.3915	6.11622		49.1986	5.5002
35.7402	12.1884		-24.4717	8.58032
24.7343	12.3205		-35.5734	14.6085
-36.8788	3.69614		-13.4625	14.9605
21.0419	14.9165		-30.7624	10.3404
21.2955	5.4122		-22.2271	5.28019
-35.8248	5.5002		52.4758	4.13615
20.9978	6.33623		52.5775	5.14819
16.8654	49.1938		-30.2713	16.5446
-37.2376	3.30012		47.9691	37.8854
20.6779	5.06019		-24.6329	16.4566
-50.8775	4.22416		-18.0969	4.53217
24.5521	21.1648		-34.1592	3.96015
18.2108	24.5529		-14.8661	65.7824
22.597	5.01618		-34.3396	28.337
-35.9769	4.48816		-30.8622	23.7169
-39.9618	3.30012		-51.6899	4.53217
-48.4064	3.91614		-23.6684	19.4487
35.3604	12.2324		48.7515	3.96015
22.8127	3.56413		52.4641	3.16812
27.2729	3.82814		50.267	27.677
20.947	5.01618		-25.2446	6.60024
18.6078	13.5525		-17.9741	6.29223
22.2739	4.04815		-34.8794	14.2565
-38.7268	5.14819		-30.7307	3.43213
-41.8987	23.4969		-25.2309	23.1449
-51.3894	3.52013		-23.6317	3.21212
17.5904	6.55624		-38.8708	7.56828
31.203	15.1806		52.5764	4.04815
25.6158	18.1727		-20.5052	24.3329
-52.6081	3.43213		44.7743	12.0564
-46.8523	3.96015		-21.2231	34.1013
31.9021	6.11622		-24.0233	6.20423
19.2993	19.8447		-15.5407	5.58821
17.8226	14.9165		-14.12	4.75217
34.9197	21.8688		-7.14387	4.66417
33.3013	16.0606		0.0131104	3.52013
24.8754	3.60813		-18.3261	10.2524
-51.0642	11.5284		-17.8091	33.6612
21.7879	10.1644		-4.52764	3.91614
-45.1182	6.95226		-11.2106	18.9647
32.3543	3.30012		-32.0073	26.709
-40.1722	6.64424		45.151	25.1689
-51.1316	5.5442		45.9652	7.30427
-33.4656	4.40016		52.7326	2.94811
-43.3496	7.70028		-20.4205	4.66417
23.063	3.30012		-30.2224	9.15234
-37.0001	5.67621		49.1986	5.5002
21.9586	17.9527		-24.4717	8.58032
20.1611	17.3366		-35.5734	14.6085
-51.6931	11.9244		-13.4625	14.9605
35.3915	6.11622		-30.7624	10.3404
35.7402	12.1884		-22.2271	5.28019
24.7343	12.3205		52.4758	4.13615
-36.8788	3.69614		52.5775	5.14819
21.0419	14.9165		-30.2713	16.5446
21.2955	5.4122		47.9691	37.8854
-35.8248	5.5002		-24.6329	16.4566
20.9978	6.33623		-18.0969	4.53217
16.8654	49.1938		-34.1592	3.96015
-37.2376	3.30012		-14.8661	65.7824
20.6779	5.06019		-34.3396	28.337
-50.8775	4.22416		-30.8622	23.7169
24.5521	21.1648		-51.6899	4.53217
18.2108	24.5529		-23.6684	19.4487
22.597	5.01618		48.7515	3.96015
-35.9769	4.48816		52.4641	3.16812
-39.9618	3.30012		50.267	27.677
-48.4064	3.91614		-25.2446	6.60024
35.3604	12.2324		-17.9741	6.29223
22.8127	3.56413		-34.8794	14.2565
27.2729	3.82814		-30.7307	3.43213
20.947	5.01618		-25.2309	23.1449
18.6078	13.5525		-23.6317	3.21212
22.2739	4.04815		-38.8708	7.56828
-38.7268	5.14819		52.5764	4.04815
-41.8987	23.4969		-20.5052	24.3329
-51.3894	3.52013		44.7743	12.0564
17.5904	6.55624		NaN	NaN
31.203	15.1806		-30.9694	34.1893
25.6158	18.1727		-26.3701	19.8887
-52.6081	3.43213		32.4996	13.8165
-46.8523	3.96015		27.225	4.35616
31.9021	6.11622		-22.4107	34.8493
19.2993	19.8447		28.1334	12.2765
17.8226	14.9165		-30.9802	30.8011
NaN	NaN		29.0171	8.44831
37.5584	4.18015		-29.9229	3.38812
30.9951	3.12411		29.68	10.2964
-29.2988	32.6052		-31.7435	11.2644
-35.5863	3.82814		30.9954	64.5064
-29.6595	4.13615		-50.1442	16.0166
31.7184	3.60813		-50.7771	50.1618
-32.5641	17.4246		14.3562	7.65628
-35.2043	3.30012		-30.9694	34.1893
31.0499	6.11622		-26.3701	19.8887
-25.6626	13.9485		32.4996	13.8165
-28.3245	18.7007		27.225	4.35616
-24.4731	29.0411		-22.4107	34.8493
37.5584	4.18015		28.1334	12.2765
30.9951	3.12411		-30.9802	30.8011
-29.2988	32.6052		29.0171	8.44831
-35.5863	3.82814		-29.9229	3.38812
-29.6595	4.13615		29.68	10.2964
31.7184	3.60813		-31.7435	11.2644
-32.5641	17.4246		30.9954	64.5064
-35.2043	3.30012		-50.1442	16.0166
31.0499	6.11622		-50.7771	50.1618
-25.6626	13.9485		14.3562	7.65628
-28.3245	18.7007		NaN	NaN
-24.4731	29.0411		12.1664	2.90411
NaN	NaN		27.9974	32.7812
-18.054	40.1295		25.2477	15.6646
-23.0256	8.66832		26.2762	46.6417
-14.6597	5.4122		-19.2295	3.08011
-20.3997	4.92818		26.85	3.30012
-18.4696	3.60813		18.967	7.12826
-17.283	4.48816		-15.2067	3.47613
-11.108	2.90411		23.6453	26.973
-14.2971	52.8899		19.3899	3.43213
-17.361	79.2029		19.6111	19.0087
-17.5032	3.38812		26.1794	13.1565
-22.0464	3.96015		20.7336	6.11622
-12.9006	4.40016		11.9774	3.91614
-21.4904	8.1843		-18.2557	5.4122
-19.9306	3.16812		11.4867	5.58821
-16.5527	3.21212		29.7858	6.82025
-18.054	40.1295		25.141	4.18015
-23.0256	8.66832		18.2755	3.38812
-14.6597	5.4122		12.1664	2.90411
-20.3997	4.92818		27.9974	32.7812
-18.4696	3.60813		25.2477	15.6646
-17.283	4.48816		26.2762	46.6417
-11.108	2.90411		-19.2295	3.08011
-14.2971	52.8899		26.85	3.30012
-17.361	79.2029		18.967	7.12826
-17.5032	3.38812		-15.2067	3.47613
-22.0464	3.96015		23.6453	26.973
-12.9006	4.40016		19.3899	3.43213
-21.4904	8.1843		19.6111	19.0087
-19.9306	3.16812		26.1794	13.1565
-16.5527	3.21212		20.7336	6.11622
NaN	NaN		11.9774	3.91614
-49.3323	4.79618		-18.2557	5.4122
-20.0464	17.7327		11.4867	5.58821
-5.68076	5.94022		29.7858	6.82025
27.6041	3.47613		25.141	4.18015
13.581	32.6052		18.2755	3.38812
9.58582	9.90036		NaN	NaN
30.9432	4.13615		6.56106	11.8364
33.5433	9.15234		-41.4045	3.43213
-7.10502	7.92029		3.69063	10.2964
-19.0712	16.5006		16.7406	78.2789
27.3883	25.961		6.46287	7.61228
12.8974	44.9257		-42.4538	14.1685
38.5134	4.53217		-35.7703	8.71232
40.9665	9.02033		15.5446	5.3682
10.4697	10.6924		-7.24931	7.61228
9.03908	4.09215		-9.32976	5.80821
-51.0551	3.16812		-46.9392	4.70817
-49.076	4.70817		-46.8822	3.74014
-18.1673	5.89622		-37.7698	6.95226
40.2543	23.8929		-45.161	3.69614
9.35586	10.9124		-49.8193	2.6401
28.7334	6.11622		-37.719	8.80032
35.5428	2.5961		9.0862	21.9568
33.5119	2.55209		9.35116	4.88418
-15.4653	8.31631		52.3749	3.87214
-7.18066	39.1174		-46.3993	6.51224
-8.29673	12.7165		4.03025	5.3682
-9.43	10.1204		-15.4037	5.01618
28.1176	4.09215		-37.6954	5.23619
39.4718	50.7339		-46.2867	2.7281
-7.4769	2.5961		15.4775	3.47613
			-47.7545	2.8161
			-0.632804	6.24823
			-6.57733	20.8128
			-12.7559	3.47613
			-52.517	3.74014
			-38.2873	21.2088
			50.5696	7.48027
			-37.9235	4.84018
			-49.3796	5.4562
			-40.757	4.13615
			13.2984	25.5209
			13.5895	15.8846
			-7.91284	4.53217
