# Supplementary material for: Cortical waves mediate the cellular response to electric fields
Source: eLife. 2022 Mar 23;11:e73198. doi: 10.7554/eLife.73198 (PMC8942472; doi:10.7554/eLife.73198)
Supplement: Figure 4—figure supplement 2—source data 1. [file elife-73198-fig4-figsupp2-data1.xlsx]

## Sheet: Sheet1
Fig.4- figure supplement 2 - source data
X direction - the direction of each pixel within a wave θ, then the x projection of wave propagation is defined as :
Font: the previous cathodal side / Back : the current cathodal side (facing the reversed cathode)
	No EF				P1 : 3 min before EF reversal				P2: 0- 3 min after EF reversal				P3: 3- 6 min after EF reversal				P4: 6- 9 min after EF reversal				P5: 9- 12 min after EF reversal
	Front		Back		Front		Back		Front		Back		Front		Back		Front		Back		Front		Back
	x direction	Area (pixel^2)	x direction	Area (pixel^2)	x direction	Area (pixel^2)	x direction	Area (pixel^2)	x direction	Area (pixel^2)	x direction	Area (pixel^2)	x direction	Area (pixel^2)	x direction	Area (pixel^2)	x direction	Area (pixel^2)	x direction	Area (pixel^2)	x direction	Area (pixel^2)	x direction	Area (pixel^2)
	0.307958	705	0.280132	45	0.990588	9	-0.221075	229	0.981147	119	-0.774514	248	-0.798519	134	0.31033	275	-0.97872	152	0.61191	352	0.525349	365	0.152771	128
	-0.803166	20	-0.115588	162	-0.417521	408	-0.433818	201	-0.854405	144	-0.420439	142	0.793437	158	-0.398185	669	-0.780861	81	0.682475	286	-0.98188	244	-0.0589963	138
	0.400798	235	-0.275269	43	0.093646	192	-0.994655	159	-0.892957	123	0.524847	176	0.143712	235	-0.453266	517	0.111333	1128	0.975921	111	0.730588	245	0.569914	523
	-0.0461005	522	-0.602006	80	-0.480421	160	-0.215894	110	0.851091	543	0.255348	329	0.236492	444	0.972099	54	0.658261	47	-0.904375	51	0.183212	946	0.864959	131
	0.48117	405	-0.123421	197	0.373727	264	0.102549	257	0.688932	157	0.58333	440	-0.445964	1132	0.481589	175	-0.958324	150	0.0825796	156	-0.890863	44	0.472215	12
	-0.936551	157	-0.999044	1	0.0758741	248	-0.868271	174	-0.102802	168	0.0599876	181	0.977844	234	0.410347	164	0.458811	388	-0.219551	20	0.843755	208	-0.894895	267
	-0.750887	24	0.253032	478	-0.215216	142	0.388207	253	-0.692469	479	-0.303832	182	0.27326	417	-0.324474	430	-0.450234	132	0.567778	192	-0.304581	284	-0.4553	106
	0.766709	1939	0.116618	171	-0.706493	209	-0.500106	639	-0.925492	368	0.383468	155	0.870416	256	-0.240375	197	0.0877555	241	-0.691031	24	0.60981	245	0.86551	6
	0.601418	87	0.127714	93	-0.935627	170	-0.0712995	183	0.913921	173	-0.391463	3	0.648816	190	0.96913	65	-0.554077	1	-0.338448	184	-0.953582	46	-0.548122	115
	0.293381	121	0.709672	150	0.700175	205	-0.817334	347	-0.980492	123	0.293329	141	-0.475782	60	-0.572687	325	-0.909397	16	-0.0285017	15	0.129725	710	0.218448	442
	-0.0686942	195	-0.6489	121	0.254034	140	0.803109	12	-0.941638	129	0.36106	436	0.266336	470	0.786636	405	-0.00792239	773	0.0202175	151	0.290224	154	0.911183	126
	-0.100579	193	-0.215969	215	0.435182	236	-0.226735	184	0.446846	452	0.944686	55	-0.591688	924	0.170183	220	0.558317	38	0.423954	1062	0.326665	741	-0.0581909	162
	0.157228	306	0.200262	545	0.105989	227	-0.932943	145	0.529196	151	0.673395	219	0.679865	221	-0.499851	132	0.298674	190	0.278859	137	-0.475078	196	-0.838114	330
	0.829435	525	0.118679	167	-0.288922	142	0.679078	307	-0.687288	71	0.0391532	343	-0.033909	396	-0.53083	185	-0.620976	213	-0.278066	13	0.91112	112	-0.555073	87
	-0.876726	128	-0.0328766	124	-0.671161	380	-0.503956	874	-0.399798	217	-0.701047	575	0.981189	8	-0.565662	119	0.502082	375	0.606579	162	0.179258	275	0.808786	42
	0.249153	152	-0.90991	230	-0.139885	231	-0.713512	57	0.995602	1	0.673683	140	0.940534	198	-0.922506	107	0.486688	211	-0.395105	96	0.989187	251	-0.509164	138
	-0.730874	28	-0.337594	165	-0.355628	95	-0.50579	353	-0.582707	490	-0.538863	7	0.127978	150	-0.422756	98	-0.528147	55	0.61814	692	0.279374	413	0.990502	129
	-0.870009	24	0.317025	757	0.889605	192	-0.254304	123	-0.460781	372	-0.529791	1	-0.561655	223	0.888387	61	-0.426357	139	0.0273549	129	-0.264299	118	-0.73063	322
	0.825736	2066	-0.0149479	164	-0.0636153	212	-0.954281	193	0.291243	133	0.547366	346	-0.126728	156	0.974303	15	-0.22109	818	-0.382071	82	-0.211242	3	-0.490638	51
	0.419566	1197	-0.649293	134	-0.410316	153	0.629102	198	0.26685	134	0.952701	73	0.93324	153	0.816607	280	0.0293838	39	-0.826658	13	-0.482311	200	0.469551	279
	-0.854454	133	-0.296399	188	-0.517773	75	0.227303	136	0.167328	114	0.686379	294	0.995023	20	0.998508	155	0.130482	266	0.706907	193	0.209117	517	-0.887803	160
	0.42832	174	0.945593	140	0.208367	35	-0.569671	1022	0.360488	130	0.124368	309	0.612796	144	0.129671	210	-0.127737	135	0.676758	238	-0.840949	192	-0.687949	237
	-0.797894	37	0.0939433	658	0.832176	141	-0.149395	160	-0.34958	167	-0.590506	679	-0.49288	416	-0.233417	41	0.260112	623	0.779154	766	0.888923	101	-0.573317	24
	-0.890408	64	-0.355912	202	-0.024361	196	-0.777642	369	-0.9748	9	0.760243	223	0.78174	160	-0.93956	124	-0.231214	171	-0.215359	79	0.72243	234	0.505076	278
	0.745477	2018	0.576775	189	0.0520156	187	-0.96154	237	-0.558257	485	-0.492583	9	0.985681	181	-0.0491771	59	-0.957605	42	-0.960566	9	0.957455	197	0.774538	215
	0.0364445	254	-0.430718	166	-0.119089	332	0.030791	14	-0.161819	261	0.993155	6	-0.693866	281	-0.882841	9	0.989198	16	0.425064	108	0.122179	610	-0.861092	13
	0.176781	184	0.230014	195	0.382545	14	-0.127011	231	0.286022	251	0.713415	248	0.862674	32	0.735266	139	-0.181801	600	0.303354	227	-0.0458089	821	-0.568033	185
	-0.800927	22	0.150213	339	0.988001	240	0.493347	85	-0.9182	6	0.951436	62	0.331659	322	0.977502	156	-0.207568	160	-0.37001	146	-0.851315	220	0.37217	174
	-0.909318	226	-0.0497436	290	-0.0222466	171	-0.75599	897	-0.386778	179	0.736697	273	-0.97303	103	0.645757	136	-0.454498	30	0.779426	49	0.850013	79	0.805169	281
	0.57822	2959	0.659576	241	0.318048	322	0.0493142	253	-0.991138	28	0.233696	795	0.0232423	97	-0.666126	152	0.324062	403	0.915898	497	0.368797	313	-0.966776	153
	0.978089	31	-0.501563	518	-0.262619	281	-0.402019	275	-0.242018	114	-0.350504	275	-0.602374	161	0.40289	52	0.460604	150	-0.516116	212	0.841154	208	-0.615294	437
	0.392487	189	0.285834	227	0.937474	13	0.079198	205	0.181857	149	0.805927	260	0.172103	86	-0.97208	137	0.0989468	503	0.163873	217	0.691424	272	0.0138879	77
	-0.88525	299	-0.490212	526	0.996108	235	-0.778537	282	-0.464884	504	0.0929045	82	0.335011	477	0.339152	388	0.170512	391	-0.24067	147	-0.074528	295	-0.527065	107
	0.815017	2098	0.550949	94	-0.0108727	111	-0.420283	197	0.930938	221	0.800748	191	-0.777416	310	0.88271	172	-0.881313	9	0.51819	180	0.12032	43	0.890665	272
	0.679157	28	-0.375923	389	0.261061	300	-0.890632	105	-0.103901	197	-0.0763424	130	0.579833	42	0.91309	200	0.0389215	292	0.915065	324	0.582237	412	-0.941453	87
	-0.999735	1	0.0848279	119	0.0501485	357	-0.111422	87	-0.507681	255	0.913526	31	0.841148	121	0.812301	130	-0.342545	177	-0.528804	249	-0.869469	191	-0.664491	321
	0.0315067	914	0.021341	262	0.966596	19	-0.701406	1140	-0.272367	123	0.609825	167	0.348127	314	0.571071	58	-0.622504	4	0.00151956	213	0.626086	97	-0.628327	80
	0.471489	23	-0.39606	722	0.9794	161	-0.149735	309	0.0455042	111	-0.7198	132	-0.436329	1111	-0.946863	28	0.483957	364	0.15754	142	0.588328	700	0.93483	124
	-0.685617	78	-0.528568	185	0.42678	306	-0.282786	286	0.72879	159	0.730392	279	0.648983	162	0.430578	295	0.802955	149	-0.489136	141	-0.563942	551	0.517707	113
	-0.746657	441	0.590836	65	0.383333	135	-0.268638	162	0.185394	432	0.915454	106	0.134135	131	0.853482	186	0.0694669	771	0.711415	568	0.606383	323	-0.898009	43
	0.837881	2100	-0.224575	90	0.654202	309	-0.880924	851	0.15309	165	0.895984	214	0.997807	14	0.871796	205	0.497029	496	0.971079	17	-0.359795	112	-0.704931	338
	-0.0803061	32	0.0768829	144	-0.846536	82	-0.748838	799	0.274015	194	0.528011	344	0.341535	209	-0.351914	63	-0.767035	48	-0.970271	53	-0.0181075	329	-0.440907	1
	-0.685797	14	-0.122891	138	0.575138	143	0.162808	418	-0.19159	147	0.43508	296	-0.479409	140	-0.970627	123	0.641152	278	0.014173	685	0.208068	118	0.703761	120
	0.0485285	800	-0.383846	197	0.738342	268	-0.147524	301	-0.724256	216	-0.531751	232	-0.824555	104	0.373184	245	-0.669622	31	0.157401	308	0.424805	273	-0.753445	301
	0.707609	248	-0.537977	238	0.485963	132	-0.545267	184	0.801075	156	0.22003	65	0.531718	31	0.887136	196	-0.510411	152	-0.488483	156	-0.570706	195	-0.916263	272
	0.810096	256	0.310222	112	0.546431	329	-0.934327	307	0.864432	225	0.502121	134	0.816524	70	0.392628	399	0.686334	541	0.381965	152	0.205795	121	0.745178	11
	0.81715	743	0.0481707	326	0.0117713	252	-0.573043	1274	0.795967	207	0.703904	387	0.413623	473	-0.942266	27	0.913924	140	-0.617205	147	0.892359	568	-0.969749	288
	0.907539	24	0.57363	118	0.843882	92	0.387163	93	0.142741	136	0.910971	126	-0.447475	780	-0.992441	38	-0.000676153	569	-0.408331	298	-0.627661	461	-0.986779	245
	-0.617962	86	0.940467	134	0.956438	87	-0.643131	97	0.406413	342	0.108698	500	0.857071	113	0.175117	112	0.490811	790	-0.187217	148	0.97327	86	0.0149065	147
	0.535153	8	0.0111787	387	-0.963894	24	-0.602259	361	-0.259337	215	0.0627866	345	0.162208	127	-0.974239	71	0.525169	187	-0.323553	135	-0.375338	313	0.232666	116
	0.946578	271	-0.655913	734	0.498479	384	0.63491	348	0.663678	187	-0.887215	193	0.162868	219	0.954423	207	-0.747746	62	-0.975104	122	0.893443	156	-0.270686	110
	0.898944	74	0.917366	155	-0.942158	68	-0.96323	351	-0.606386	90	0.019428	102	-0.924246	100	0.546524	377	0.312686	77	-0.296339	153	-0.0145293	120	-0.98639	231
	-0.0957432	1629	-0.310305	98	-0.899137	171	-0.705293	337	0.983619	157	-0.116221	148	0.911597	26	-0.887239	168	-0.413702	188	0.475631	142	-0.497443	154	-0.240856	164
	0.624448	299	0.74772	104	0.972588	109	-0.977119	339	0.619301	134	0.85444	204	0.25978	142	0.981453	197	0.629345	410	0.275606	197	-0.200643	174	-0.2477	141
	0.0851383	772	0.311925	119	0.219036	293	-0.2918	1147	0.820325	269	0.828747	110	0.486252	687	0.948672	261	0.851854	151	-0.993925	81	0.622287	941	-0.225843	110
	0.896169	9	-0.806578	167	0.911877	57	-0.752159	147	-0.301268	187	0.00557164	229	-0.381459	468	-0.925188	229	0.164287	676	0.46233	175	-0.723606	264	-0.960513	216
	0.707647	1261	0.436447	267	0.947986	196	-0.842249	257	0.486766	270	0.826853	172	0.84185	125	0.982549	18	0.627975	1028	0.825217	13	0.259679	196	-0.00543092	231
	0.981473	159	0.710919	275	0.554427	241	0.84168	293	-0.037876	184	0.993012	62	0.33269	252	0.984193	172	0.303298	328	-0.325242	493	-0.563556	342	-0.681252	264
	-0.501175	689	-0.324649	1106	-0.0407525	368	-0.918756	356	-0.777614	121	0.0375111	372	0.476138	224	-0.133509	136	0.747532	14	0.145056	129	-0.309529	113	-0.459391	116
	0.32384	122	-0.190712	206	0.937375	214	-0.585498	548	0.841959	255	-0.23208	432	-0.845221	215	0.375848	207	-0.770483	154	0.145067	49	-0.406451	89	-0.94644	220
	0.968731	4	-0.710382	667	-0.0845056	143	-0.972445	383	0.826785	124	0.256816	128	-0.319118	141	-0.899055	173	0.789625	354	-0.967587	101	-0.844573	162	-0.00309633	182
	0.132584	227	0.0292385	135	0.862406	157	-0.346107	1368	-0.065712	50	0.149991	168	-0.911042	2	0.989149	9	0.071174	352	0.404434	167	0.677258	653	0.28534	44
	0.470352	1378	-0.542769	140	0.907305	56	0.135515	115	0.852507	254	-0.315751	112	0.249615	600	0.70208	315	-0.151443	426	0.0414362	158	-0.713541	385	-0.632649	304
	0.997399	177	-0.456414	230	0.249236	94	-0.567363	165	-0.56504	186	-0.104779	548	-0.309261	435	0.797683	101	0.749142	1104	0.975784	10	0.907054	95	-0.984382	90
	-0.197537	1508	0.221565	629	-0.921363	1	-0.719907	194	0.682598	412	0.93769	146	-0.03574	266	-0.544971	258	0.0889693	263	0.688611	189	0.44966	168	0.400388	75
	0.428161	373	0.056044	394	-0.972795	110	0.933786	212	0.172813	198	0.997029	70	-0.482473	152	0.991702	7	0.56605	315	-0.829142	248	-0.599303	385	-0.585999	221
	-0.310069	171	0.0366153	659	-0.177207	429	-0.722201	520	0.229722	308	-0.165262	148	0.271775	244	0.321424	73	0.114742	474	-0.330166	157	-0.849736	138	0.334156	83
	0.656401	394	-0.103533	213	0.930841	162	-0.671888	541	0.694061	406	0.0937927	273	0.713144	319	0.60353	36	-0.677461	515	0.945929	33	0.991345	304	0.901192	32
	0.475621	544	-0.609781	600	0.639113	344	-0.944972	303	0.885891	235	-0.749228	81	-0.600763	157	-0.427563	190	0.587233	1189	-0.816954	114	-0.611055	1017	-0.620769	243
	0.0214629	512	0.151498	213	0.458406	414	-0.4348	1268	-0.215914	263	-0.202271	127	0.395742	231	0.995537	5	0.358377	275	0.497981	340	0.793432	209	-0.447945	11
	0.870727	195	-0.579528	241	0.927004	60	-0.0858208	225	0.700264	376	-0.480487	2	-0.335792	405	-0.216185	33	-0.095043	198	-0.78235	106	0.982857	152	0.754792	202
	-0.473632	843	0.18213	1211	0.598829	200	-0.826808	191	0.94853	233	0.524669	495	-0.414636	150	-0.962484	18	-0.25916	100	-0.330991	195	0.82528	311	-0.410705	227
	0.763358	453	-0.0450012	324	-0.00657836	110	-0.388846	230	0.548059	382	-0.707949	240	0.132663	255	-0.0225881	132	0.26158	180	-0.422087	265	-0.754149	356	0.261868	154
	-0.246097	111	0.183499	293	-0.589629	70	-0.868559	158	0.5444	308	0.949648	126	-0.22348	208	-0.878366	58	0.76763	279	0.876775	90	-0.110942	177	-0.890245	156
	0.718426	603	0.60669	208	0.971754	22	0.9264	151	-0.576031	4	0.96624	101	0.233633	286	0.794812	115	0.346285	197	-0.448104	298	-0.841944	115	0.871299	57
	0.149577	426	-0.35674	238	-0.983971	102	-0.597435	437	0.521177	235	0.202013	125	-0.904901	14	0.278874	113	-0.281445	93	0.181019	116	0.904186	346	-0.566698	212
	-0.374322	331	-0.834835	445	-0.161566	203	-0.661587	536	-0.416213	296	-0.42793	205	0.734448	363	-0.202771	56	-0.81847	492	0.140195	294	-0.358776	776	0.8942	2
	-0.495075	780	0.694806	165	0.893426	62	-0.481975	1112	0.608237	412	-0.788103	100	-0.0878704	150	0.769343	161	-0.177129	596	-0.26552	159	-0.767404	146	0.457637	227
	0.317686	96	-0.213002	135	0.44254	256	-0.287773	226	0.990463	245	0.0419137	446	-0.439502	335	-0.100946	227	0.556943	306	-0.579484	214	0.791706	203	0.531145	528
	-0.493133	123	0.608219	159	-0.474141	49	0.398262	134	0.518183	389	0.0211165	96	-0.164936	361	0.367402	264	0.474895	196	0.060797	228	0.877508	505	0.525299	87
	0.782442	740	-0.475473	103	0.938976	58	-0.814749	157	0.416893	336	-0.225061	7	0.217505	191	0.402421	86	-0.139087	283	0.838202	255	0.846478	217	-0.304993	143
	0.303265	257	0.808783	185	0.052889	124	-0.959333	50	0.0862756	194	-0.599018	128	0.667889	320	0.567608	224	0.381926	180	0.694642	61	-0.690172	386	-0.655582	148
	-0.956728	102	0.00609301	168	0.0676171	178	-0.337756	143	-0.624653	1435	0.37486	571	-0.267966	308	0.78978	62	0.453145	505	-0.36232	125	0.629742	684	0.402173	95
	-0.335152	785	0.0680954	113	0.507114	514	-0.633369	145	0.538093	293	0.951699	94	0.281665	152	0.848042	70	-0.343612	144	0.238	141	-0.315323	164	-0.500184	118
	0.503521	119	0.185372	576	0.846427	1	0.394601	150	0.988932	186	0.457742	188	-0.397108	111	0.97689	113	-0.611226	136	-0.246331	301	-0.56021	39	0.669886	84
	0.849326	382	0.27859	177	0.273703	222	-0.940152	212	0.103652	614	-0.470313	169	0.554735	30	0.228717	489	-0.294149	556	-0.354706	276	0.15129	336	0.793559	85
	-0.655162	137	0.0231984	624	0.140653	304	-0.896005	156	0.139137	411	-0.890664	94	0.770974	366	0.0874648	130	0.61197	293	-0.185213	256	0.842367	230	0.638444	373
	-0.132328	170	-0.817861	727	0.939529	14	-0.745547	245	0.417336	14	0.0802577	372	0.16229	194	0.273686	303	0.541869	164	0.884204	35	-0.157305	183	0.946768	121
	-0.976475	94	-0.157644	169	-0.821044	153	-0.558288	193	0.920078	78	-0.329271	400	0.390409	221	0.650831	173	-0.313773	428	0.920317	77	0.868966	247	0.982371	122
	0.184078	776	-0.159025	121	0.37934	135	0.970025	1	0.107061	149	-0.839736	121	0.462113	277	0.484494	112	0.918902	7	-0.296798	4	0.801803	289	-0.707834	42
	0.524423	291	-0.663599	157	-0.474621	202	-0.481818	1117	-0.556727	1393	0.283824	599	-0.573306	359	-0.840691	14	-0.54006	51	0.0883674	236	-0.729391	298	0.0382939	168
	-0.352176	300	0.191711	858	0.0508739	403	-0.705663	381	0.276959	226	0.596095	26	0.613687	223	0.474831	175	-0.687199	368	0.65859	9	-0.366606	81	-0.676171	129
	-0.0739942	213	-0.0217973	176	0.924089	66	0.652087	235	0.901442	203	-0.21954	233	-0.0866194	104	0.0321977	354	-0.308055	143	0.495878	115	0.139875	250	-0.502684	74
	-0.981797	99	0.0717074	308	0.178804	49	-0.267551	146	-0.125649	621	0.80842	63	0.877402	350	-0.614851	230	0.614886	177	0.0464004	252	0.860575	473	0.61191	352
	0.143156	355	0.368104	851	0.0184508	269	0.516405	89	0.0168459	306	0.421967	155	0.187103	297	0.0637129	125	0.555756	94	-0.220405	147	-0.429622	140	0.682475	286
	0.26083	205	0.191123	486	-0.800778	435	-0.797713	123	0.971089	66	-0.998779	4	0.0299865	122	0.437196	383	0.178503	259	-0.184073	300	0.338708	167	0.975921	111
	-0.99498	48	-0.968622	510	0.79507	69	-0.930716	437	0.0582414	183	0.316965	276	-0.326627	148	0.77632	101	0.192204	282	0.864418	97	0.882876	263	-0.904375	51
	0.669875	539	0.258443	276	0.273006	14	-0.937682	229	-0.698598	273	0.927471	192	0.535884	260	0.535876	95	0.390731	142	-0.32822	77	-0.310203	173	0.0825796	156
	0.673815	422	0.781072	95	0.32371	370	-0.833558	244	-0.136158	226	0.174969	954	-0.684658	316	-0.562132	10	-0.235916	204	-0.826545	223	0.801967	192	-0.219551	20
	0.0935087	178	0.0616036	487	-0.255815	268	-0.514002	147	-0.268998	219	-0.178142	258	-0.738551	1	0.0101586	227	0.382131	147	0.0799979	291	-0.50304	302	0.567778	192
	-0.96779	94	-0.355531	187	-0.654645	555	0.899881	13	0.823021	258	-0.924682	178	0.593073	247	-0.389793	418	-0.389048	422	-0.189186	729	0.074332	85	-0.361141	173
	0.285011	301	-0.147975	290	-0.525125	144	-0.541333	1057	-0.26325	647	-0.194244	349	-0.0944694	113	-0.160746	111	0.993316	64	0.587012	110	-0.657609	117	0.287463	128
	0.380554	323	0.453474	505	-0.685221	216	-0.836342	331	0.306907	459	0.247588	153	0.971634	328	0.279655	201	0.597056	26	0.954785	31	-0.368693	147	-0.6803	130
	-0.99627	74	0.458688	631	-0.872094	1	0.899632	167	-0.320183	177	0.000277974	100	0.135836	674	0.131514	136	-0.181838	334	0.450027	130	-0.519699	309	-0.368038	154
	0.761782	142	-0.80849	993	0.678351	60	0.101123	121	0.988361	70	0.928212	65	-0.00336555	176	0.476903	601	-0.0574677	346	0.31033	275	0.404532	408	0.122217	221
	-0.99368	45	0.0579323	446	0.272998	209	0.270831	67	0.140889	317	0.281095	607	0.410604	158	0.414524	192	0.74098	145	-0.398185	669	0.0986694	110	-0.296477	167
	0.38347	142	-0.429127	134	-0.432531	278	0.944227	70	-0.592089	118	-0.0606433	243	-0.727242	286	-0.336857	19	0.348041	350	-0.453266	517	0.396087	107	0.0229333	225
	-0.915996	92	-0.908831	211	-0.234944	375	-0.674457	1064	-0.217003	156	-0.391164	394	0.586513	156	-0.774514	248	0.172914	295	0.972099	54	0.934527	181	0.174463	506
	0.77256	122	-0.305357	183	-0.987245	10	-0.96427	173	-0.53007	115	0.522998	171	-0.0892131	193	-0.420439	142	0.358679	150	0.481589	175	-0.28848	199	-0.843346	133
	0.319412	388	-0.128685	211	0.78331	2	-0.406121	106	0.140394	127	0.051054	760	0.902611	274	0.524847	176	0.250082	230	-0.499907	232	0.864527	146	0.160891	144
	0.340423	249	-0.611283	147	-0.734816	100	-0.223758	169	0.907656	35	0.959906	6	0.0184733	1046	0.255348	329	-0.0115797	267	0.227372	226	-0.662712	298	-0.40539	151
	0.166385	253	0.386755	591	0.617527	1	0.618823	391	-0.182776	255	0.359791	299	-0.120863	195	0.58333	440	-0.4354	374	0.326693	234	-0.00515783	134	-0.442995	175
	0.432898	95	0.750469	1033	-0.862989	12	-0.675327	767	0.825792	239	-0.903151	208	-0.500101	227	0.0599876	181	0.98969	96	0.212918	244	-0.708006	321	0.725687	138
	-0.957789	167	-0.758425	977	-0.890733	45	-0.910382	219	-0.399726	450	0.48233	254	0.973455	179	-0.303832	182	0.825492	192	0.932638	47	0.06147	147	-0.675877	147
	-0.854801	81	0.255757	111	-0.79933	39	-0.550753	699	0.657973	187	0.603992	215	-0.305062	217	0.383468	155	0.147946	303	0.734635	213	0.0637904	152	0.938982	141
	0.0377878	234	-0.554087	286	0.518953	148	-0.866556	321	-0.232462	602	-0.181667	140	-0.0924353	174	-0.391463	3	-0.753636	15	0.913101	39	-0.378206	109	-0.236304	385
	-0.419865	239	-0.526653	133	-0.437449	274	-0.498532	485	0.997221	22	-0.335045	515	-0.965287	19	0.535137	294	-0.00560898	299	0.80257	183	0.750878	207	0.365314	846
	-0.0312334	184	-0.10624	133	-0.0394708	545	-0.0222179	547	0.165118	128	-0.541335	230	0.254851	141	-0.0250081	39	0.964949	36	0.0746031	131	-0.289045	357	0.958746	32
	0.316941	226	-0.502497	237	-0.360665	7	0.641982	361	0.426617	209	0.0835812	272	-0.0544114	150	0.705626	228	0.504304	345	0.967659	33	0.963589	84	-0.29428	573
	0.0880839	198	0.172117	595	-0.870858	65	-0.0902241	221	0.995723	27	0.865009	18	-0.802007	52	0.537125	117	-0.042186	226	0.150367	135	-0.716739	272	-0.391759	598
	0.650256	88	0.53908	1827	-0.776715	221	0.412514	235	0.0991966	268	0.239288	231	0.568026	346	0.372147	184	0.0265667	145	0.746387	128	-0.78729	268	0.130632	244
	0.922546	248	0.982873	2	0.732747	19	0.353601	396	-0.346525	27	-0.33579	343	0.0101801	321	0.433427	101	0.0903027	230	0.26669	139	-0.172117	118	-0.184281	724
	-0.171963	237	-0.539576	800	-0.969094	47	-0.559006	333	0.766694	229	0.381684	240	0.0445708	130	0.969844	87	-0.147033	373	0.0892183	147	-0.0898233	123	0.478813	918
	-0.167295	184	0.405478	417	-0.392281	321	-0.494824	318	0.0551997	664	-0.927445	198	-0.604013	247	-0.514395	61	-0.472558	357	-0.611236	172	0.162685	59	-0.923114	184
	-0.210069	153	-0.801058	242	0.0910481	679	-0.784097	171	0.738458	187	0.642334	328	-0.46106	156	0.292837	133	0.887355	240	0.883167	70	-0.967943	117	0.328059	152
	0.265736	159	0.209138	156	-0.923527	69	-0.164006	130	-0.366517	802	-0.19962	249	-0.0467432	155	0.149736	389	0.856582	176	0.331849	122	0.561685	187	0.652052	44
	-0.103262	206	0.00910761	116	-0.803673	27	-0.304651	548	0.975679	155	-0.319052	570	0.945491	24	-0.309827	156	0.408085	254	0.92672	9	-0.433874	417	0.10784	218
	0.340205	144	0.271065	244	-0.956609	244	0.174577	499	0.107483	160	0.0737259	183	0.779092	4	0.355037	172	0.0131347	140	0.0829633	264	0.996805	15	-0.956041	146
	0.972551	284	-0.106792	668	-0.722407	328	-0.55188	540	-0.166433	173	-0.480651	10	0.413132	410	0.013632	166	0.119307	234	0.804237	187	-0.798151	337	-0.435242	507
	0.402246	142	0.577907	766	-0.184041	673	0.519189	45	0.234187	130	-0.55173	173	0.0114813	868	0.15887	335	-0.117089	129	-0.303713	279	-0.947172	209	0.0778462	363
	0.593902	119	0.24506	323	-0.502979	4	-0.648396	244	-0.851447	94	0.0529262	767	-0.0317966	282	0.204807	591	-0.0687735	233	0.927436	33	0.438609	167	0.0436284	945
	0.903228	13	0.332187	383	0.291119	175	0.0584456	310	0.941376	33	0.363716	189	0.696284	150	-0.253316	178	-0.187704	411	0.2213	131	-0.211328	97	0.58058	1056
	0.501451	355	-0.805759	976	-0.894556	250	-0.526386	157	0.626195	430	-0.962733	279	-0.769393	194	0.0650871	184	0.360784	257	0.191119	272	-0.145902	898	-0.763011	110
	-0.920669	595	-0.390293	142	-0.781875	168	-0.139953	275	-0.0526285	592	0.625136	412	-0.148589	200	-0.083509	273	0.946356	143	0.139611	165	0.995733	16	-0.64547	119
	-0.760763	415	-0.701329	138	-0.31358	111	0.848863	120	0.955163	147	-0.769121	201	0.202122	163	-0.959053	156	0.937192	152	-0.644842	239	-0.720594	355	-0.300129	137
	-0.17476	167	-0.516467	191	-0.846777	548	-0.258272	361	-0.482172	636	0.167189	543	0.996722	24	0.0484929	312	0.604968	215	0.966568	89	-0.599122	200	0.645369	54
	0.539866	1795	0.155717	241	-0.115824	173	0.107018	417	-0.584952	155	0.0334793	239	0.997737	4	-0.955432	70	0.553585	594	0.14924	160	0.0706633	108	0.103344	140
	0.297111	199	-0.273812	471	-0.558294	11	-0.0822544	295	0.96046	231	-0.746942	664	0.650472	532	0.141682	816	0.356849	244	0.498757	192	-0.420639	140	-0.219259	190
	-0.202165	874	0.199892	296	0.37843	289	-0.680093	590	-0.240627	194	0.4451	138	0.922836	118	-0.0854916	212	0.140571	90	-0.767539	411	-0.244715	123	-0.673706	341
	0.416987	157	0.713798	144	-0.0519543	123	-0.554202	199	-0.104335	179	0.234496	175	0.427394	45	-0.63741	156	0.356821	114	0.989019	213	0.0277305	670	-0.319011	928
	-0.964039	389	0.169034	613	0.677088	235	-0.231947	30	0.465177	494	0.0540734	1030	-0.262684	599	-0.645343	230	-0.390586	188	-0.769477	133	0.999581	14	0.0434499	510
	-0.408714	469	-0.125071	176	-0.942066	123	-0.375289	102	0.0951735	444	-0.740493	167	-0.307571	333	0.510622	315	0.532495	225	0.102219	265	-0.936016	197	0.461828	715
	0.00225724	520	0.716404	132	-0.593176	455	-0.436964	285	0.955286	155	-0.195561	228	0.36978	161	-0.339137	374	0.211428	229	0.893107	155	-0.737263	217	-0.995976	5
	0.56422	1932	-0.101904	783	-0.280827	216	-0.121268	149	0.0193788	633	0.211743	452	0.0968831	117	-0.944149	150	0.945873	73	0.464812	148	-0.431316	183	0.153071	936
	-0.136854	500	-0.374374	488	0.15444	19	-0.07984	289	0.993512	118	-0.28488	258	-0.038063	143	0.346315	468	0.973011	134	0.868644	313	-0.3883	311	-0.284884	286
	-0.0509319	1463	0.397459	210	0.991354	8	-0.218095	308	-0.0911046	188	-0.779788	327	0.730017	603	-0.99863	9	0.666124	218	0.0815377	205	-0.952388	110	-0.157322	123
	-0.48175	89	-0.543405	488	-0.967987	46	-0.189711	440	0.992374	47	0.42643	159	0.850835	217	0.238869	271	0.689159	493	-0.841769	177	-0.058677	85	-0.872441	595
	-0.512419	115	-0.0268676	334	-0.128268	166	-0.263246	322	-0.735295	319	0.284041	165	0.442814	4	-0.686892	405	0.558685	293	0.114902	773	-0.643053	88	0.164607	258
	-0.486735	234	-0.174774	197	-0.244124	209	-0.233754	622	-0.412297	188	-0.287803	929	-0.411291	418	-0.477732	451	-0.5144	9	-0.0634971	511	0.00665344	571	-0.52222	427
	-0.287687	100	0.00331081	233	-0.168071	176	-0.766375	249	0.863259	131	-0.696515	214	-0.492644	373	-0.385424	225	0.572161	261	-0.193692	744	0.988005	27	0.464382	376
	0.00999385	186	0.459963	197	0.562264	126	0.00873688	148	0.678918	259	-0.0848003	156	-0.686732	149	-0.505574	522	-0.323977	156	0.368231	164	-0.851723	221	0.0474043	723
	-0.130796	247	0.192233	520	0.320144	450	-0.0335531	170	0.199673	391	0.282016	156	0.761271	137	0.806791	392	0.147164	172	-0.00394773	631	-0.956913	162	-0.185623	154
	0.404193	403	-0.0620696	874	-0.966371	24	-0.329094	213	0.717845	298	-0.533676	148	-0.422892	135	-0.997422	2	0.913084	160	-0.574741	384	0.162966	312	0.511212	894
	0.486378	1872	-0.105043	738	-0.433107	187	0.569303	53	0.0588417	618	-0.643693	295	-0.629585	134	0.578273	540	0.808842	196	0.588669	16	-0.97872	152	-0.104322	1128
	-0.0991886	848	-0.13137	168	-0.195344	333	0.0786013	139	0.990588	9	-0.109321	280	0.930319	12	-0.875616	479	0.341993	397	0.0225029	275	-0.780861	81	0.503621	188
	-0.0260034	1365	-0.613176	170	-0.405418	164	-0.808134	180	-0.417521	408	0.326792	216	0.805513	594	-0.387501	714	0.877409	559	-0.383204	76	0.111333	1128	-0.984289	115
	-0.491871	133	0.0518294	90	0.390753	332	0.305559	163	0.093646	192	-0.0283909	213	0.607352	158	-0.466764	425	-0.0767847	134	0.833827	509	0.658261	47	-0.306418	629
	0.388545	137	0.958213	167	0.796341	34	0.0891115	168	-0.480421	160	-0.500763	895	-0.300744	408	0.307383	619	0.605359	238	-0.29056	322	-0.958324	150	-0.184412	272
	0.690276	187	0.984189	3	-0.822431	25	-0.138543	128	0.373727	264	-0.356695	184	-0.848723	357	-0.472321	765	0.971972	32	-0.0227452	234	0.458811	388	0.317909	204
	-0.180055	324	-0.98411	195	-0.148003	279	-0.601746	43	0.0758741	248	0.336727	328	0.981147	119	0.783677	919	0.885122	96	-0.176503	440	0.988361	98	0.688957	130
	-0.248959	197	-0.311384	170	0.214394	562	-0.0540965	755	-0.215216	142	-0.485958	188	-0.854405	144	-0.0490347	461	-0.304014	132	-0.00200537	206	-0.329084	210	0.092192	357
	0.235113	187	0.163942	416	-0.250529	283	-0.272844	189	-0.706493	209	-0.915615	147	-0.892957	123	0.24445	458	0.770798	191	0.0449182	152	-0.242746	772	0.364285	73
	0.319327	362	0.215652	204	-0.566575	120	-0.358611	416	-0.654375	91	-0.378294	600	0.851091	543	0.946124	209	0.416598	777	0.0178072	516	0.99532	320	0.115894	567
	0.238889	1970	-0.0095757	156	-0.297602	105	-0.695204	560	0.0583551	307	0.289469	190	0.688932	157	-0.308914	605	0.0221525	954	0.48753	119	-0.461638	931	-0.23025	439
	-0.0589979	659	0.982869	122	0.836293	6	-0.552979	293	-0.288894	500	-0.660896	332	-0.102802	168	0.36244	305	0.0928175	265	-0.333301	169	0.760903	351	0.645748	127
	0.0412265	1276	0.912796	50	-0.436842	127	-0.569186	31	-0.716936	178	0.0668223	295	-0.692469	479	0.43063	436	0.0934474	326	-0.250466	237	-0.495018	559	0.0695092	550
	-0.438454	196	-0.994417	162	0.245111	98	-0.200599	93	0.0556933	124	-0.646386	750	-0.925492	368	0.562676	429	0.719214	296	0.226628	115	0.976695	36	-0.778309	194
	-0.488813	148	-0.0818929	178	-0.888699	74	-0.938562	153	0.628725	10	-0.353506	287	0.178387	1040	0.942799	169	-0.798519	134	0.107946	97	-0.604953	154	0.134485	90
	0.0359468	229	-0.246394	137	-0.0807	160	-0.190061	173	-0.0935521	142	-0.221075	229	-0.11864	234	-0.552447	551	0.793437	158	0.063073	150	0.0523617	812	-0.354853	714
	-0.414168	446	-0.688286	267	0.272178	141	0.283566	289	0.113619	386	-0.433818	201	0.977044	45	0.381532	337	0.143712	235	-0.197934	177	0.963116	230	-0.0291764	78
	0.766121	94	-0.602463	187	0.645132	614	-0.0805237	647	-0.833887	144	-0.994655	159	-0.101356	893	0.224092	296	0.236492	444	-0.323485	186	-0.488922	783	-0.0624585	649
	0.230347	1672	0.0345221	142	0.306817	208	-0.314791	622	-0.818294	135	-0.215894	110	0.115023	968	0.464182	396	-0.445964	1132	-0.0606665	253	0.712958	479	-0.228317	1422
	0.585348	793	0.972472	141	-0.555304	146	-0.550319	26	-0.10995	127	0.102549	257	0.0624258	235	-0.691229	260	0.977844	234	0.535137	294	-0.478556	709	0.397373	39
	0.0289983	731	0.295194	33	0.0815333	192	-0.6918	1061	-0.482047	194	-0.868271	174	0.866158	13	0.00857823	411	0.27326	417	-0.0250081	39	0.720656	163	-0.579249	219
	-0.7609	115	0.602351	109	0.67199	110	-0.577609	156	0.162018	140	0.388207	253	0.43932	310	0.746027	203	0.870416	256	0.872593	90	-0.503417	328	0.388741	367
	-0.363843	368	-0.991872	201	-0.987019	25	-0.470272	215	0.339793	329	-0.500106	639	-0.450046	501	0.402176	211	0.129193	228	-0.276798	217	0.479967	159	0.839665	307
	-0.341315	185	0.401147	172	0.133518	307	-0.478018	142	-0.353928	151	-0.0712995	183	0.544151	128	0.137976	917	0.469699	129	-0.393539	114	0.0600452	741	-0.60779	75
	-0.317243	322	0.877242	275	-0.974886	3	-0.843142	10	-0.141803	236	0.296965	337	-0.0558775	442	-0.577984	492	-0.46395	2109	-0.376209	195	0.986336	275	-0.342839	1714
	-0.848752	140	0.129345	246	-0.0580657	388	-0.499921	401	0.165173	193	0.0550854	682	-0.0216456	307	0.872727	359	-0.757893	220	0.198704	726	-0.320676	517	0.967079	128
	0.0529174	219	-0.279344	507	0.702362	235	-0.972409	166	0.148221	92	-0.868156	37	0.711101	12	-0.016117	393	0.81371	4	-0.937233	136	0.973654	280	-0.391353	125
	0.229041	938	-0.993406	26	-0.951712	45	-0.525808	196	-0.46866	103	-0.852104	43	-0.0442517	635	0.945799	112	-0.220826	735	-0.0271568	162	0.246458	419	0.0576609	601
	0.441692	171	0.95694	153	-0.956716	34	-0.899959	168	-0.919022	181	-0.128962	106	0.0655623	136	-0.327983	148	-0.480366	223	-0.597978	117	-0.997417	44	-0.838378	150
	0.427553	736	-0.992827	127	0.112281	600	-0.962978	177	0.530873	154	-0.32525	211	-0.578206	227	-0.0466331	240	-0.274395	1080	-0.97901	156	0.108954	154	-0.0818555	297
	-0.811645	158	0.0834802	208	0.589302	138	-0.71353	264	-0.086286	302	0.507437	399	-0.0126776	194	0.536832	53	-0.26031	120	0.900311	28	0.142131	757	-0.530151	273
	-0.804467	166	0.880081	226	0.740842	106	-0.935352	128	-0.120987	304	0.905423	148	0.107081	246	-0.158078	430	-0.110181	549	0.271212	135	0.992227	220	0.0191597	110
	0.222882	150	0.0245654	265	-0.894499	202	-0.153662	150	0.216838	330	0.639962	16	0.274878	1	0.794	159	-0.196201	1699	0.130987	696	-0.361881	830	0.35641	466
	0.151534	532	0.758405	508	0.122568	373	-0.558351	144	0.25238	133	-0.0989427	264	-0.0935217	480	0.762582	106	-0.114064	726	-0.902964	101	-0.0661119	221	0.858916	278
	-0.856588	2	-0.99889	2	-0.0798385	211	-0.93618	2	0.508254	79	-0.360353	492	-0.454316	141	-0.826987	154	-0.088885	1483	-0.454227	263	0.830816	303	0.946101	68
	0.324665	139	-0.000848455	116	0.106135	321	0.999113	7	-0.965014	160	-0.0397887	376	0.105988	176	-0.180898	68	-0.223523	1274	0.364122	165	-0.882009	134	-0.483964	136
	0.538976	211	0.712667	212	0.824662	146	0.968799	44	0.24618	289	-0.0871061	325	-0.445433	243	-0.410875	2	-0.288637	715	-0.613999	694	0.292491	335	-0.18832	1637
	-0.816567	86	0.643675	254	-0.979776	101	-0.977763	68	0.251356	690	-0.311479	41	0.341959	233	0.736023	434	-0.0309958	503	0.849557	95	-0.710088	33	-0.964216	148
	0.263597	613	0.627429	410	-0.946777	73	0.829801	203	0.123263	151	0.292501	291	-0.903723	148	0.079504	198	0.787029	322	0.890802	9	-0.529902	271	-0.233244	436
	0.39381	145	-0.221181	68	0.0513499	583	-0.811391	117	0.516697	56	0.784269	176	-0.435268	300	0.777952	1	-0.328504	779	-0.398913	530	0.361751	589	0.0852167	148
	0.227466	652	0.0436083	149	0.466578	64	-0.661582	142	-0.332861	98	0.213919	1459	-0.197381	329	0.888816	295	-0.308875	290	-0.0249858	332	0.986673	171	-0.149017	205
	-0.169159	224	0.525569	405	-0.594718	134	0.674231	138	-0.916946	120	-0.389883	449	0.239447	148	0.425634	106	-0.132221	1394	-0.848991	89	-0.76892	672	0.390352	329
	-0.832985	150	0.54083	415	-0.10928	286	0.783239	430	-0.477967	272	-0.340743	439	0.462354	306	0.740877	306	0.27995	659	0.283271	114	-0.0176205	181	0.26214	185
	-0.0795414	505	0.141028	253	-0.240118	284	0.0209979	109	0.264592	237	-0.641427	90	0.554568	136	-0.285382	205	0.546471	182	-0.546581	247	-0.514592	127	0.119887	156
	-0.563871	638	-0.610598	56	-0.421466	347	-0.841708	144	-0.0327484	222	0.402165	177	0.375558	926	0.72699	9	0.667411	194	0.766217	148	-0.122008	140	-0.499907	232
	-0.394338	606	0.29811	274	0.671309	256	-0.591788	89	0.130778	262	0.405773	189	0.729341	1581	0.227517	67	-0.297635	366	-0.0862047	550	-0.655446	399	0.65412	119
	0.500334	166	-0.0324188	431	-0.945145	14	-0.136112	140	0.386738	137	0.296113	1417	-0.892188	18	0.56339	924	0.072912	290	0.163166	288	0.462715	404	-0.65969	201
	-0.083216	239	0.995626	5	-0.955341	46	-0.908963	133	0.253759	166	0.00539124	241	0.717529	1498	-0.572295	128	0.279952	564	-0.333855	443	0.987373	139	-0.15945	96
	-0.230818	144	0.232995	2	-0.973096	55	0.712903	443	-0.339613	225	-0.0717843	1204	-0.907782	58	-0.809849	308	-0.0856189	194	-0.0122181	171	-0.7336	649	-0.577476	224
	0.596192	124	-0.576141	265	0.34027	355	-0.99084	128	-0.346251	611	-0.36362	1101	0.275497	260	0.137538	42	-0.237374	385	0.162516	714	0.957103	278	0.926421	272
	-0.435515	237	0.158957	418	0.198993	217	0.227661	153	0.448575	156	0.804874	129	0.755028	960	-0.0913056	135	0.664803	791	0.0431328	165	-0.61053	215	-0.194655	155
	-0.0601851	447	-0.947591	25	-0.832532	346	0.187005	99	0.167314	224	-0.837575	161	-0.83706	1	0.420388	264	0.246644	712	0.526394	154	-0.019169	258	0.341382	74
	-0.477097	787	-0.568845	134	-0.0348962	268	-0.822458	128	-0.816997	56	-0.632033	460	-0.925007	105	0.376159	1064	-0.161566	304	0.0429991	659	0.881354	55	-0.696758	178
	-0.483504	1181	-0.414545	399	-0.0441501	127	0.253081	94	-0.241935	192	0.21445	171	0.731537	1100	0.403525	106	0.722027	734	0.957438	33	-0.577931	21	0.917178	637
	0.709773	288	0.995971	26	-0.987917	12	-0.970426	143	0.617406	187	0.120297	1232	-0.981166	87	-0.710022	318	0.230164	1084	-0.96623	51	0.0997709	1666	0.759993	135
	0.121077	642	0.604635	26	-0.981612	65	-0.992633	199	0.041491	489	-0.316435	814	-0.948882	6	-0.0469191	361	-0.251234	223	0.272066	345	-0.162714	322	0.790431	136
	-0.0578016	352	0.996201	2	-0.223037	165	-0.289209	276	-0.201823	314	0.0468405	891	-0.895553	103	-0.0184949	251	0.731516	829	-0.998708	9	-0.549812	157	0.648826	416
	0.503372	146	-0.103179	498	0.0730915	612	0.554242	63	0.524975	134	-0.428842	613	0.732244	939	0.607084	434	0.362913	1062	-0.132241	288	-0.350607	371	0.65745	164
	0.723291	109	0.47616	358	0.74995	21	-0.301636	388	-0.161161	357	0.0290331	126	-0.984795	39	-0.0664255	1100	-0.934611	139	-0.553605	184	0.216718	136	0.947752	82
	0.240063	260	-0.279449	135	-0.480886	15	-0.637445	193	-0.933635	68	-0.309657	1082	-0.966764	24	-0.0465984	8	0.684771	1057	0.180193	242	0.0246898	1469	-0.598168	401
	-0.0376424	388	-0.900896	148	0.836593	66	-0.679412	232	0.662285	39	-0.0363471	1443	0.523715	900	-0.502919	237	0.0540905	1005	0.996443	104	-0.148681	159	0.983533	128
	-0.747818	342	-0.886232	37	-0.938673	141	-0.55012	228	-0.609362	179	-0.241983	1073	-0.983494	61	-0.308363	642	0.262887	131	-0.875884	136	-0.152444	249	0.00596515	264
	-0.77936	974	-0.202413	238	-0.999877	1	-0.309581	161	0.813333	148	-0.159977	215	-0.575536	168	0.0775948	183	0.124899	111	0.29366	107	-0.202614	182	0.271335	247
	-0.17816	267	0.260243	345	0.0509956	431	0.187062	714	0.236354	14	-0.519749	1077	0.559303	897	-0.493597	215	0.728621	1159	0.344504	358	0.077878	212	-0.680686	556
	0.471553	490	-0.530079	134	0.201012	1464	-0.259549	192	-0.664978	174	-0.294215	283	-0.991171	113	-0.245144	242	-0.0664657	607	-0.352737	375	0.969115	18	0.964131	160
	-0.149226	1333	-0.363079	312	-0.879252	282	-0.730474	519	-0.781809	179	-0.271105	418	0.37785	873	0.877532	678	0.211548	306	0.906715	49	0.0613504	119	-0.0549631	254
	0.188403	400	0.0216327	256	0.875136	5	-0.82448	177	-0.797958	44	0.88004	14	-0.107574	163	0.835783	277	-0.0747948	299	-0.146236	524	-0.321217	135	-0.444769	338
	0.169328	796	-0.0698959	130	-0.863352	77	-0.12806	216	0.966928	53	0.0254607	1046	0.345835	610	-0.25035	190	0.610266	701	-0.918854	141	0.0988938	366	0.787547	214
	-0.876781	322	-0.113483	210	-0.440596	301	-0.0575128	488	-0.14908	216	-0.321449	1344	-0.993993	128	0.996148	12	0.462356	548	0.220691	203	-0.053296	509	-0.959989	530
	-0.0709686	273	-0.0615155	166	0.358418	1373	-0.771575	84	-0.920619	3	0.0237504	227	0.320032	167	-0.148879	689	-0.0885465	647	-0.317109	56	-0.208605	190	0.975834	219
	0.981164	135	-0.0151746	181	0.213213	403	-0.806585	104	0.0298498	707	-0.531852	1466	0.63168	138	-0.261654	528	0.622876	299	0.42579	110	0.186134	126	-0.0270316	117
	-0.799457	130	0.991458	9	-0.508305	53	-0.886382	231	0.527988	180	0.0019611	260	0.270217	378	-0.94845	4	0.644836	540	0.283418	175	0.0324717	189	0.654366	143
	0.430884	185	0.216846	190	-0.805095	299	-0.00512877	543	0.639242	64	0.84431	35	-0.198936	137	0.636389	72	-0.382644	374	-0.666596	180	0.230382	139	-0.691795	481
	-0.947199	41	0.57086	158	-0.489055	149	-0.575469	594	0.684858	167	0.117742	900	-0.68132	266	-0.62802	146	0.430867	803	-0.510466	321	0.240421	30	0.988657	129
	-0.815986	70	-0.982991	167	0.191675	397	0.355548	89	-0.286624	877	-0.576833	778	0.25859	280	0.837288	417	-0.0964584	612	0.98336	27	0.307167	309	-0.782325	30
	-0.555943	376	0.125219	163	-0.533957	144	-0.930387	44	-0.82427	12	0.132144	794	-0.586607	42	0.968736	109	0.973698	281	0.48024	282	0.676551	6	-0.134461	189
	-0.759467	364	0.977965	1	-0.367007	117	-0.438376	312	0.238833	182	0.562142	129	-0.541058	192	-0.396319	581	-0.745559	130	-0.923716	129	-0.221962	270	-0.245939	304
	-0.365358	445	0.361793	254	-0.096865	47	-0.513761	25	0.947677	46	-0.233175	1548	0.198251	211	-0.282203	147	0.886236	456	-0.589397	146	0.272311	270	0.01642	119
	-0.438385	153	0.307868	135	0.289779	134	-0.25971	296	-0.0657707	796	-0.179498	526	0.612044	160	0.296965	337	0.269332	1240	-0.491534	102	-0.643253	221	0.99055	49
	0.950711	220	0.195304	167	-0.877095	164	0.21797	321	0.0456487	267	0.108914	848	0.146562	282	0.0550854	682	0.98321	179	-0.297312	228	0.189324	353	-0.0851674	167
	-0.896465	83	0.984068	4	0.796607	29	-0.840222	669	0.246014	239	0.0486788	1184	-0.628565	413	-0.868156	37	-0.0145575	393	-0.828759	129	0.0301085	267	-0.349137	223
	-0.0142791	1433	-0.378563	181	-0.0293595	588	-0.72978	79	-0.207038	199	0.256047	818	0.505878	263	-0.852104	43	0.906522	431	-0.950151	87	0.190941	189	-0.639144	131
	-0.212222	298	0.207186	352	-0.890064	239	-0.444031	110	-0.670406	135	-0.443425	200	0.891346	94	-0.128962	106	0.302051	1547	0.952833	625	-0.352691	208	0.56132	160
	0.34203	597	0.421196	219	-0.0405775	130	-0.0636404	119	-0.293207	189	-0.33367	606	-0.348941	161	-0.32525	211	0.979111	154	0.989093	110	-0.100031	746	0.997809	24
	0.220707	120	0.849296	153	-0.159423	219	0.0365081	131	-0.351478	128	0.242014	620	0.0988361	435	0.507437	399	-0.166317	693	-0.768895	289	0.449398	160	-0.152104	176
	-0.207794	105	0.719517	216	-0.734532	24	-0.458252	211	0.951935	47	-0.505212	173	-0.39958	373	0.905423	148	0.317116	325	0.468491	5	0.38251	357	-0.208681	196
	-0.68777	190	-0.844265	118	-0.797475	71	-0.865068	297	0.106779	345	0.2435	158	-0.427149	189	0.639962	16	-0.661474	131	-0.894679	88	-0.203049	265	0.409703	357
	-0.0208524	438	-0.00860368	205	-0.50365	214	0.264932	20	0.896068	235	0.301884	127	0.300091	155	-0.0989427	264	0.25322	582	-0.501786	139	-0.166287	815	0.999527	15
	0.805831	170	-0.357966	338	0.527668	193	0.0433934	267	-0.438057	195	0.353271	249	0.904743	3	-0.360353	492	-0.598739	553	-0.0373537	137	0.104847	406	-0.981721	100
	-0.751421	276	0.614189	232	0.950894	44	0.0713611	316	-0.472689	174	0.695355	154	-0.654375	91	0.0945501	198	0.984517	83	0.0303369	211	0.0671184	1328	-0.241852	23
	-0.116309	669	0.615636	160	0.0869844	379	-0.920684	285	0.995096	2	0.00819811	820	0.0583551	307	0.929444	56	0.0712669	425	0.0829159	180	0.830043	219	0.0288167	42
	0.703467	238	-0.958013	128	-0.951947	201	-0.237087	33	0.03524	392	0.152089	290	-0.288894	500	0.823422	44	0.178387	1040	-0.50721	273	-0.0777602	1315	0.438564	236
	-0.457339	137	-0.534887	132	-0.466834	570	-0.498366	166	0.928567	212	-0.389795	594	-0.716936	178	0.197922	207	-0.11864	234	-0.815695	66	0.0880338	351	0.999149	9
	0.95903	172	0.310167	237	-0.130389	299	0.446012	500	-0.661197	136	0.359952	133	0.0556933	124	-0.626212	644	0.977044	45	0.986354	710	0.993204	271	-0.920227	71
	-0.258434	601	-0.748245	138	0.596294	112	0.950138	11	-0.122053	166	-0.362568	642	0.628725	10	-0.601402	3222	-0.101356	893	0.970946	158	-0.144415	1105	0.0195143	86
	-0.0496179	1883	0.686242	158	0.788424	9	-0.942259	37	-0.597937	270	0.225362	329	0.0468696	233	0.932348	55	0.859323	317	0.508721	308	0.172411	429	0.0476426	65
	-0.0466503	137	0.233958	270	-0.962003	41	0.0524264	165	-0.813952	174	0.792624	194	-0.264327	219	-0.955127	170	0.482851	430	-0.206156	110	-0.0126122	283	-0.972598	7
	0.212633	254	0.0749396	523	0.0529903	241	-0.267829	239	-0.252778	345	-0.0661374	724	0.145373	697	-0.469328	644	0.936229	183	0.116117	229	-0.545084	1717	-0.795041	153
	-0.644901	193	-0.378352	160	-0.983905	216	0.251369	80	0.931348	223	0.598674	217	0.598918	413	-0.724712	317	-0.0432195	997	-0.832731	115	0.445899	293	-0.237151	51
	0.611215	158	-0.507938	155	-0.408483	433	-0.914665	241	0.718194	343	0.106241	118	0.596034	463	-0.876764	345	0.792657	286	0.0606512	232	0.10802	223	0.408695	1
	-0.0218439	327	-0.193917	130	-0.132307	764	0.310737	16	-0.584612	170	0.468709	99	0.233146	569	0.881079	72	0.434724	772	0.0579001	169	-0.643487	1637	-0.735227	96
	-0.0286445	152	0.495068	372	-0.762191	162	-0.967037	6	-0.912868	237	0.0161682	530	0.504828	398	-0.127073	344	0.0345869	194	-0.156346	371	-0.320937	154	0.444999	200
	-0.604104	139	-0.14503	315	-0.617337	6	-0.0625073	548	-0.196283	134	-0.728465	100	0.117002	277	-0.395774	519	0.518979	1069	0.950828	496	0.096795	237	0.889515	22
	-0.194276	690	-0.927015	136	0.964411	50	0.731469	880	-0.0851644	301	-0.90888	108	-0.392617	186	-0.506352	1763	0.11648	378	0.932232	283	-0.612874	1652	-0.775875	104
	0.296511	441	0.831374	133	-0.0988306	222	-0.0288895	226	0.947282	177	0.165102	259	-0.0129791	143	0.86868	12	0.390617	1396	-0.559195	487	-0.149249	157	-0.628288	117
	-0.652347	183	0.181805	233	-0.902265	478	0.0273889	188	0.380577	571	-0.63996	469	0.485577	250	0.225577	110	0.557783	251	0.125147	245	0.129193	228	0.756113	32
	0.329861	277	0.164826	338	-0.648391	129	-0.858838	92	-0.184402	196	0.217082	354	-0.278069	165	0.183952	225	0.469857	987	-0.202044	220	0.469699	129	0.740031	331
	0.679866	355	0.0654962	166	-0.400663	286	-0.587838	158	0.0604359	182	0.392693	695	0.583782	557	-0.77669	95	-0.684375	222	0.230586	388	-0.46395	2109	-0.841324	166
	-0.833842	285	-0.185564	129	0.143748	478	-0.623055	535	0.962287	261	-0.227114	366	0.0655035	648	-0.966124	15	0.615107	171	0.838721	370	-0.757893	220	-0.95094	131
	0.217885	1185	-0.37996	321	-0.964701	140	0.881743	66	-0.474466	1178	0.569144	257	0.292881	173	-0.842074	172	0.35905	1410	0.947688	306	0.609828	742	-0.428959	6
	-0.438747	211	0.544	188	-0.059809	412	0.855056	847	-0.487847	246	-0.719365	34	0.416971	324	0.073418	194	-0.262297	213	-0.812189	848	0.213741	240	-0.130881	19
	0.315305	386	-0.402246	142	-0.909512	20	-0.907446	136	0.0384805	120	-0.589474	861	0.507162	207	0.170924	366	0.585386	165	0.931702	72	0.875977	50	0.817861	7
	-0.338816	644	-0.593902	119	-0.0649877	214	-0.0162439	162	-0.28305	242	0.712429	289	0.109081	276	-0.785362	227	0.588811	125	-0.518184	150	0.0804381	512	0.997727	125
	0.814006	211	-0.903228	13	-0.849934	481	-0.708642	74	0.158103	155	-0.39659	275	-0.140145	162	0.0214752	1681	0.397237	2762	0.53745	983	0.87177	387	0.975489	73
	0.0841769	63	-0.501451	355	-0.762061	191	-0.967727	1	-0.818434	227	0.520541	184	0.528232	377	-0.536018	300	0.434705	405	0.676166	715	0.392167	480	-0.368848	217
	-0.413333	123	0.920669	595	0.36399	429	-0.924198	313	0.893783	173	0.145405	354	0.401788	159	-0.648028	1261	0.998095	12	0.816309	379	0.505054	235	-0.519321	425
	0.283674	445	0.760763	415	-0.245459	903	0.335087	116	-0.486369	751	-0.586661	388	-0.00469169	493	-0.00167918	413	0.845831	157	-0.867888	533	-0.141395	1455	0.947941	63
	0.268528	298	0.17476	167	-0.546312	190	0.614458	142	-0.0936965	123	0.0445917	603	-0.361361	142	0.529596	198	0.902615	133	0.884766	210	0.212069	533	0.997584	68
	-0.265648	129	-0.539866	1795	-0.674553	291	0.840138	437	0.631279	178	-0.0190036	367	0.516794	338	-0.439309	492	0.476373	290	-0.66194	178	0.547333	478	-0.107264	113
	0.85854	264	-0.297111	199	-0.575782	322	-0.680463	187	-0.803231	291	-0.688338	152	0.647216	580	0.0237268	137	0.237992	2224	-0.508264	152	0.189043	551	-0.120847	131
	-0.150721	341	0.202165	874	0.0645435	267	-0.967392	49	-0.0190544	154	-0.245572	79	-0.415801	165	0.0758375	125	0.944857	450	0.725778	215	0.828165	344	-0.792275	112
	0.446963	1476	-0.416987	157	-0.265297	1779	0.991548	106	-0.873012	271	0.375595	133	-0.694788	62	-0.441249	328	0.784353	318	-0.936828	125	0.242249	338	-0.729535	506
	-0.64225	206	0.964039	389	0.205465	5	-0.951525	126	0.307562	177	0.697182	927	0.937662	118	-0.759868	224	0.438207	347	-0.737052	341	0.423018	291	0.475327	90
	0.123957	736	0.408714	469	-0.855446	93	-0.545295	165	-0.0203586	666	-0.54347	23	0.247232	421	0.0741269	1540	0.935918	151	0.157267	737	-0.204549	718	-0.880558	686
	0.55711	556	-0.00225724	520	0.243923	139	0.0692285	20	0.291119	175	-0.640226	114	-0.662649	138	-0.347216	598	0.54181	547	-0.98974	49	0.498187	1296	0.862665	46
	0.64604	593	-0.56422	1932	-0.898305	591	-0.344925	151	-0.894556	250	-0.234798	268	-0.351803	152	0.227056	398	0.229164	712	0.840515	346	0.809889	264	0.809582	137
	-0.114541	231	0.136854	500	-0.7108	119	0.0518838	212	-0.781875	168	-0.283456	956	0.368367	200	-0.381841	1220	0.134883	752	0.88484	163	0.831841	340	-0.182215	239
	0.64615	146	0.0509319	1463	-0.134844	241	-0.354559	224	-0.31358	111	-0.002577	1375	0.678052	530	0.859885	603	0.864496	339	-0.460292	150	-0.460127	206	-0.663874	696
	0.654781	375	0.48175	89	-0.0785634	193	0.143854	187	-0.846777	548	-0.0701752	743	0.253823	179	0.795226	222	0.949177	337	0.721346	86	-0.856661	42	0.939935	315
	0.081445	406	0.512419	115	-0.643093	151	-0.845676	120	-0.115824	173	0.240696	347	-0.0780338	323	0.143762	103	0.389049	432	-0.914758	179	-0.17242	205	0.989564	115
	0.388167	1972	0.486735	234	0.698945	110	0.572267	258	-0.558294	11	-0.815636	137	-0.261438	98	0.0156331	1083	0.738781	287	-0.252023	163	0.108286	158	0.648407	571
	-0.162597	462	0.287687	100	-0.521943	1300	-0.401192	218	0.37843	289	-0.519987	99	-0.964016	163	0.0175458	255	0.749897	451	0.398017	557	0.980676	14	-0.815519	178
	0.232636	1074	-0.00999385	186	0.239602	27	-0.814382	220	0.624865	367	-0.795147	106	0.471155	134	-0.0972649	645	0.466873	865	0.572681	1644	0.974455	1	-0.527524	206
	0.915894	138	0.130796	247	-0.739939	142	-0.334053	119	0.531174	422	-0.163848	301	0.522495	764	-0.189012	2092	0.357436	649	0.617101	747	-0.104593	111	0.09425	126
	0.542639	135	-0.404193	403	0.756726	181	-0.147371	333	0.314278	286	0.806491	323	-0.0465847	443	0.428818	211	0.944845	362	0.916391	142	0.0699823	306	-0.215308	168
	0.0183893	69	-0.486378	1872	0.122321	349	-0.270934	1121	0.088833	157	0.509566	119	-0.352307	132	0.151425	1564	0.151513	270	0.148236	1313	0.51189	1269	-0.338479	236
	0.837998	107	0.0991886	848	0.0845521	1587	-0.109986	1462	0.169497	1505	0.0293264	902	0.307954	906	-0.278109	121	0.956976	124	0.538994	1	0.636228	337	-0.487312	852
	0.801515	110	0.0260034	1365	-0.956905	244	0.05771	1554	0.347033	306	0.092144	1511	0.87862	672	0.458958	431	0.424927	332	-0.121542	237	0.432272	1297	-0.96241	115
	0.690664	287	0.491871	133	-0.927902	19	-0.130469	874	0.586849	659	-0.286588	717	-0.252906	776	0.0422627	922	0.808209	982	0.15845	188	-0.417217	273	0.872593	90
	-0.101884	255	-0.388545	137	0.426335	342	-0.200245	888	0.633797	298	0.348149	178	-0.566642	129	-0.286341	340	0.428911	561	0.65586	608	0.125026	110	-0.276798	217
	0.636456	119	-0.690276	187	-0.628214	18	-0.16897	298	0.720914	209	-0.77593	152	0.202417	289	-0.151384	508	0.865405	611	0.277452	34	0.535375	123	-0.393539	114
	0.75698	218	0.180055	324	-0.0446132	1335	-0.790629	118	0.294272	248	-0.0268177	182	0.85214	169	-0.205725	2823	0.97873	137	0.580473	1183	-0.424948	212	-0.376209	195
	0.0991653	116	0.248959	197	-0.967846	169	-0.231801	737	0.0823312	984	0.400199	237	0.736011	406	0.608991	157	0.0341153	167	0.937185	53	0.471953	1996	0.198704	726
	0.545447	297	-0.235113	187	-0.843958	37	-0.254704	1666	0.555455	448	0.167233	358	-0.758943	360	0.141964	896	0.985304	111	0.199332	510	0.629722	724	-0.937233	136
	0.445269	172	-0.319327	362	-0.87325	119	-0.262297	1918	0.411214	515	0.725302	165	-0.113509	888	0.0557497	596	0.657805	194	0.385809	1477	-0.0440668	319	-0.519395	579
	0.197786	343	-0.238889	1970	-0.751199	2	-0.15054	992	0.225159	322	-0.354405	323	-0.809845	184	-0.0125502	1035	0.696656	1279	0.228979	255	-0.116029	518	-0.681007	124
	0.270803	1898	0.0589979	659	-0.269657	936	-0.514037	1222	0.925187	67	-0.0701878	436	0.161096	624	0.570007	9	0.5708	294	0.624193	149	0.811829	656	0.797252	457
	0.272188	706	-0.0412265	1276	-0.984097	129	0.203016	227	0.0474055	4	-0.131202	138	0.00528128	152	0.517461	4	0.739133	844	0.237963	157	-0.737809	148	0.706756	232
	0.379421	514	0.438454	196	0.462457	47	-0.231943	93	0.390244	767	0.0315104	1784	0.909121	205	-0.208968	672	-0.492683	155	-0.206668	230	-0.113166	136	-0.474348	487
	0.45354	232	0.488813	148	-0.962748	28	-0.438506	1869	0.315262	1061	-0.379234	864	0.740909	163	-0.578362	1478	-0.352957	206	0.100199	40	0.3538	275	0.509022	782
	-0.138929	173	-0.0359468	229	-0.654709	872	0.048922	173	0.149593	445	0.0947972	87	-0.673087	172	0.360264	221	0.252126	130	0.349579	646	0.307487	896	0.120035	715
	-0.257578	63	0.414168	446	-0.963942	111	-0.480642	2758	-0.344507	15	0.211164	205	0.3415	77	0.296217	1319	0.621168	253	-0.0497095	106	0.800923	731	-0.634533	466
	0.0714868	194	-0.766121	94	-0.570679	38	-0.122541	979	-0.00536749	177	0.892545	150	0.0504246	782	0.263909	1146	0.00343938	601	-0.552893	391	0.193667	845	0.471188	743
	0.932045	93	-0.230347	1672	-0.646236	824	-0.224378	652	0.901418	81	-0.155965	167	-0.95781	155	-0.402581	664	0.575983	917	0.124138	1501	-0.672714	127	0.0884694	662
	0.552664	168	-0.585348	793	-0.990091	2	0.380094	123	-0.201945	30	0.0488493	389	0.271237	338	-0.241321	2567	0.501867	330	0.59137	175	0.316867	220	-0.542429	336
	0.691165	123	-0.0289983	731	-0.68878	903	-0.254577	376	0.549857	283	-0.613785	387	-0.214996	741	0.76307	360	0.554252	130	0.853788	130	0.115359	185	0.572351	475
	-0.897765	247	0.7609	115	-0.838736	983	0.533733	191	0.977803	176	0.973226	334	0.488858	238	0.376317	975	-0.951177	58	-0.347815	375	-0.538162	157	-0.51619	303
	0.34877	300	0.363843	368	-0.948253	134	-0.645748	2638	0.626054	1348	-0.0516613	1567	0.70006	59	0.170189	209	0.943568	354	-0.348239	288	0.434027	15	-0.0444846	514
	-0.19077	269	0.341315	185	-0.784354	12	0.0578931	841	-0.497066	519	-0.727555	432	-0.850797	75	0.492276	114	-0.610305	232	-0.639946	60	0.547108	56	-0.374658	506
	-0.0524559	481	0.317243	322	-0.98715	30	-0.553264	1093	0.686309	113	0.477442	10	0.257939	771	0.760703	9	0.424829	158	-0.49694	468	0.202415	1755	0.604182	272
	0.0365604	1572	0.848752	140	-0.844907	1425	-0.0850538	1241	0.675292	176	0.584296	163	-0.889738	171	-0.326151	569	0.642889	229	-0.0164543	346	0.170377	134	-0.677202	272
	0.11518	680	-0.0529174	219	-0.9305	4	0.172598	182	0.313905	209	-0.814233	49	0.54237	514	0.111868	3426	0.000370519	473	-0.308483	1024	0.194432	163	-0.0993579	511
	-0.0220992	562	-0.229041	938	-0.800311	1170	0.133479	392	0.987622	106	-0.51197	479	0.217455	429	0.82396	433	0.299793	181	0.895338	374	0.3794	865	-0.763909	778
	0.490649	107	-0.441692	171	-0.982743	65	-0.715487	3179	0.0118887	564	-0.362036	370	0.642462	352	0.19684	691	0.162846	360	0.890954	147	0.803932	917	-0.914109	263
	-0.897765	170	-0.427553	736	-0.78391	1139	0.0919923	369	-0.787959	546	0.313528	615	-0.693319	288	-0.011997	21	0.417914	221	-0.338209	222	-0.814274	299	-0.726378	211
	-0.220054	261	0.811645	158	-0.547186	109	-0.240105	1386	0.510912	159	0.112205	206	-0.118262	87	-0.626928	107	0.222979	149	-0.506414	1166	0.247637	311	0.514597	507
	0.857852	54	0.804467	166	-0.634603	1154	-0.251391	1470	-0.581793	115	-0.789534	408	0.204764	404	0.196106	467	-0.688616	380	0.0945501	198	0.958195	144	-0.849783	359
	-0.0925959	162	-0.222882	150	-0.949653	196	-0.620403	116	0.996475	37	0.98649	468	-0.173602	320	0.2394	151	0.953582	292	0.929444	56	-0.0521491	432	-0.759102	209
	0.342706	166	-0.151534	532	-0.441012	1122	0.51887	222	-0.03889	365	0.276274	500	0.503376	785	0.232406	1523	-0.678709	217	0.823422	44	0.00204678	295	-0.55065	257
	0.230333	130	0.856588	2	-0.965484	36	-0.407643	5029	0.619503	258	-0.829104	403	0.256556	311	0.712368	444	0.271131	294	0.197922	207	0.364236	1079	0.631525	580
	-0.0813479	128	-0.324665	139	-0.535628	1176	-0.250894	1419	-0.583083	370	-0.952582	31	0.037361	22	-0.0349123	1084	-0.182591	14	-0.626212	644	0.469716	1416	-0.906595	41
	-0.189763	152	-0.538976	211	-0.650936	87	-0.456684	5186	-0.439758	138	-0.928255	122	-0.0672768	386	-0.218034	179	-0.104779	158	-0.601402	3222	-0.712317	717	-0.64227	358
	-0.714101	388	0.816567	86	-0.776238	799	-0.23509	1701	-0.901935	1	-0.462737	173	0.662294	515	0.069852	2520	-0.068809	249	-0.259745	751	-0.480762	188	-0.455334	131
	-0.219166	411	-0.263597	613	-0.975577	6	0.322465	116	0.315355	386	-0.820349	196	0.416445	162	-0.736347	332	0.216087	210	0.109101	866	0.86084	240	-0.803316	197
	-0.0309775	1449	-0.39381	145	-0.131462	669	-0.552145	5060	-0.491171	114	-0.38523	512	0.349938	143	-0.247971	931	-0.124101	222	-0.496643	860	0.932171	9	-0.260852	58
	-0.263321	331	-0.227466	652	-0.947043	17	-0.317076	1237	-0.142015	215	0.385393	126	0.962204	383	0.165909	324	-0.821596	420	0.178319	872	0.929223	117	0.605233	335
	-0.276965	903	0.169159	224	-0.661479	65	-0.477852	212	-0.923841	126	-0.19682	222	-0.242692	382	0.201991	20	0.70677	716	-0.0340654	379	0.376071	251	-0.765958	147
	-0.32546	669	0.832985	150	-0.894677	1	-0.722432	4502	0.534025	80	0.981326	318	0.875556	153	-0.0167341	474	-0.264509	817	-0.716971	748	0.468952	229	-0.546141	302
	0.853829	26	0.0795414	505	-0.983828	20	-0.540562	1102	0.134951	620	0.72771	193	0.239837	743	-0.993411	14	-0.427253	251	0.662519	448	0.702684	1019	-0.528302	57
	0.0918476	92	0.563871	638	-0.240929	1682	-0.761825	4723	-0.757086	127	-0.148232	234	-0.489179	677	-0.280218	166	0.014587	244	-0.633303	616	0.495267	1196	-0.723587	172
	0.388077	168	0.394338	606	-0.907862	25	0.678531	157	-0.526622	61	0.194448	333	0.50344	747	0.354498	410	0.691213	249	0.0273069	847	-0.640276	1185	-0.67295	311
	-0.0913212	136	-0.500334	166	-0.645667	43	-0.773005	1111	-0.349677	206	-0.775592	455	-0.516853	136	0.115312	1575	-0.12823	491	-0.402002	2	0.984955	201	0.0625977	26
	0.0450446	193	0.083216	239	-0.874463	5	-0.792886	4660	-0.973304	1	-0.978666	44	0.363111	107	-0.820447	303	0.969745	151	-0.451797	604	0.955608	21	-0.508008	18
	-0.665686	47	0.230818	144	-0.0760302	252	0.0300839	328	-0.348584	196	-0.210547	168	0.0378147	127	-0.231036	652	0.284841	457	-0.0208951	842	0.928763	172	-0.882929	116
	-0.344141	114	-0.596192	124	-0.283857	1051	-0.916776	923	-0.81918	90	-0.690728	250	0.251988	187	0.349277	207	-0.15294	966	-0.241648	560	0.0567547	166	-0.910256	353
	-0.0360435	396	0.435515	237	-0.995024	1	-0.917313	345	-0.673448	53	-0.692336	232	0.557181	124	0.853139	158	0.148795	190	-0.0287338	862	0.378403	518	-0.619083	37
	-0.335309	376	0.0601851	447	-0.145377	301	-0.830616	9	-0.342249	170	0.515147	151	-0.762498	60	0.261401	145	-0.0903167	119	-0.0871067	882	0.953593	369	-0.153128	102
	-0.186548	1469	0.477097	787	-0.857696	18	-0.574169	2675	0.820208	180	0.342298	125	0.465557	163	-0.00716134	1343	0.89826	225	0.706691	2	0.444816	439	-0.90401	69
	-0.445295	295	0.483504	1181	-0.960873	2	-0.130574	9	-0.981222	5	0.153123	217	0.970014	385	-0.920534	214	0.827121	147	-0.476182	242	-0.209491	233	-0.925204	359
	-0.183993	906	-0.709773	288	-0.887035	7	-0.952757	315	-0.934251	110	-0.69908	223	0.110962	198	-0.207151	1008	0.22686	287	0.65041	131	0.507574	1114	-0.837733	29
	-0.562472	491	-0.121077	642	-0.789553	446	-0.816721	83	-0.970913	106	-0.988372	56	0.881123	191	0.430283	120	0.006989	215	-0.0901927	853	-0.713331	861	-0.54853	143
	-0.789421	401	0.0578016	352	-0.329106	2147	-0.934113	479	0.258905	242	-0.651764	300	-0.0406405	586	0.0348328	707	0.919989	223	0.729464	1	0.864076	143	-0.95745	49
	0.13137	168	-0.503372	146	-0.96023	59	-0.504853	164	0.0549683	283	-0.577609	156	-0.343555	807	-0.67743	539	0.336938	532	-0.698708	124	0.722125	164	-0.924617	292
	0.613176	170	-0.723291	109	-0.784857	231	-0.877356	1562	-0.721198	237	-0.470272	215	0.432412	765	-0.30921	341	0.0772163	223	0.530726	59	0.335299	111	-0.902723	48
	-0.0518294	90	-0.240063	260	0.376989	833	0.397658	34	-0.878922	104	-0.478018	142	-0.441226	181	-0.259989	124	0.515015	169	0.0571703	596	0.553691	1322	-0.90411	146
	-0.958213	167	0.0376424	388	-0.0973614	1006	-0.81098	67	-0.665786	176	-0.843142	10	0.67759	149	-0.444035	3273	0.879239	217	-0.145774	147	0.949505	154	-0.957324	24
	-0.984189	3	0.747818	342	-0.988054	39	-0.777689	696	-0.130938	268	-0.499921	401	0.891237	430	-0.251351	260	0.407675	287	0.384626	503	0.238753	352	-0.918093	330
	0.98411	195	0.77936	974	0.00504332	234	-0.704148	776	-0.352663	201	0.627077	54	0.963275	220	-0.818297	139	0.117271	260	0.926721	2	0.607582	49	-0.957888	24
	0.311384	170	0.17816	267	-0.743122	70	-0.64699	910	-0.90963	271	-0.0267489	131	0.32859	266	-0.83074	130	0.200473	173	0.430336	1	0.155346	444	-0.696581	138
	-0.163942	416	-0.471553	490	0.17146	202	-0.838451	468	-0.959601	10	0.407845	186	0.817653	201	-0.0703885	582	0.89173	255	-0.12138	117	0.21104	692	-0.934792	192
	-0.215652	204	0.149226	1333	-0.916126	169	-0.191694	213	0.160692	40	-0.126714	140	-0.0822879	262	-0.982122	4	0.0751595	392	0.248525	1263	0.919047	140	-0.138374	129
	0.0095757	156	-0.188403	400	0.443391	683	-0.609983	2796	-0.21245	135	0.0298083	683	-0.934702	18	0.616054	80	-0.89007	149	0.12403	114	0.976864	203	-0.910833	193
	-0.982869	122	-0.169328	796	0.259101	241	-0.784098	125	0.110615	310	0.112789	1013	0.552686	351	-0.0705397	213	0.806441	336	0.0208884	575	-0.591668	1029	0.457357	148
	-0.912796	50	0.876781	322	-0.224167	109	-0.545527	85	-0.0276664	141	0.688696	127	0.0824258	722	-0.618756	505	-0.986038	9	0.999986	2	0.987248	152	-0.803825	182
	0.994417	162	0.0709686	273	-0.919869	38	-0.287525	275	0.754855	73	0.201965	946	-0.185716	173	-0.539478	2198	0.331642	278	0.211841	623	0.283369	5261	-0.802995	65
	0.0818929	178	-0.981164	135	0.557404	133	-0.506169	697	-0.892678	282	-0.175996	457	0.539407	296	0.0348155	177	0.0863376	118	0.111653	217	-0.342416	375	-0.596816	150
	0.246394	137	0.799457	130	0.930543	178	-0.477664	842	-0.884358	175	0.29734	315	-0.933735	42	0.179105	735	0.856788	163	0.155922	103	-0.52801	147	-0.37503	689
	0.688286	267	-0.430884	185	-0.143636	113	0.0773134	170	-0.902008	201	0.578918	140	-0.917847	132	-0.310553	274	0.681905	1237	-0.04637	598	0.633062	277	0.863873	262
	0.602463	187	0.947199	41	0.549776	148	0.677413	182	-0.395666	48	0.0272114	213	0.542494	283	0.999882	2	-0.0387965	289	0.993164	29	0.445127	335	-0.928528	136
	-0.0345221	142	0.815986	70	-0.562834	172	-0.553255	384	-0.988872	3	0.455238	46	0.554097	1325	0.560495	268	0.878345	463	0.262971	389	0.799653	779	-0.203278	541
	-0.972472	141	0.555943	376	0.968462	12	-0.659035	375	0.18432	689	0.0736513	769	-0.646257	131	-0.286718	720	-0.968858	22	-0.713572	3	0.932922	153	0.125149	728
	-0.295194	33	0.759467	364	-0.698968	163	-0.367801	273	0.385335	406	0.120842	218	0.327097	523	-0.327534	1704	0.428371	285	0.413031	411	0.299356	2501	-0.650904	3
	-0.602351	109	0.365358	445	-0.237605	471	0.159645	142	0.0216807	205	0.476392	801	-0.968066	31	0.294439	929	0.286757	181	0.722252	242	0.951156	113	-0.259745	751
	0.991872	201	0.438385	153	0.0850657	170	-0.660746	2490	-0.281301	9	-0.984862	17	-0.868684	93	-0.00492387	673	0.260944	126	-0.00235171	738	-0.10151	414	0.109101	866
	-0.401147	172	-0.950711	220	-0.75953	213	-0.576318	888	-0.95113	40	0.471655	253	-0.282139	201	0.877466	4	0.857801	841	0.557355	116	0.684414	221	-0.970069	22
	-0.877242	275	0.896465	83	-0.223536	914	-0.513477	1388	0.252541	147	0.490872	336	0.846994	12	0.0859242	120	0.742956	212	0.174336	301	0.915222	184	0.0582128	294
	-0.129345	246	0.0142791	1433	-0.719385	154	-0.059684	262	0.459411	809	-0.637638	364	0.969667	140	0.239761	291	0.637717	575	0.768449	435	0.613525	327	-0.0582843	265
	0.279344	507	0.212222	298	-0.0953692	1506	0.504106	272	-0.363756	191	-0.164032	131	-0.901782	155	-0.230327	13	0.576724	157	-0.0800146	754	0.139067	323	-0.0616306	158
	0.993406	26	-0.34203	597	0.974015	62	-0.561426	504	-0.357784	320	-0.192191	180	0.34595	467	-0.0744488	965	0.407662	610	0.169439	304	0.64947	384	-0.252356	106
	-0.95694	153	-0.220707	120	-0.144127	1582	-0.679129	647	0.932764	195	-0.153645	296	0.531767	512	0.164371	646	0.788414	437	0.709825	582	0.482325	1401	-0.230039	290
	0.992827	127	0.207794	105	0.797426	45	-0.554038	176	-0.914353	405	0.061482	302	0.778179	432	0.865159	32	0.136351	390	-0.229253	696	0.197201	1210	0.0651752	289
	-0.0834802	208	0.68777	190	-0.213519	1606	-0.875804	184	-0.215592	107	-0.563381	258	0.974655	19	0.250821	1517	0.842779	562	0.839358	381	0.969724	151	-0.607972	206
	-0.880081	226	0.0208524	438	-0.236206	1687	-0.702178	1949	0.942333	214	0.750566	40	0.234655	246	0.0223158	720	0.934728	17	0.620799	184	0.930964	176	0.0373114	337
	-0.0245654	265	-0.805831	170	-0.641912	342	-0.780891	141	0.916274	562	0.844177	165	-0.832069	47	-0.121784	160	0.319281	623	-0.227063	707	0.527024	157	-0.523558	111
	-0.758405	508	0.751421	276	0.0316576	1332	-0.342025	474	-0.215901	163	0.452329	1528	-0.552724	181	-0.649685	466	0.760718	510	0.630715	272	0.680985	164	-0.0641808	274
	0.99889	2	0.116309	669	0.939244	48	0.161028	598	-0.95028	31	-0.0220769	399	0.289973	148	0.31666	745	0.559502	532	0.591566	145	0.989649	151	0.402998	361
	0.000848455	116	-0.703467	238	0.643092	223	-0.0852691	246	-0.151976	145	0.0960716	466	0.952155	114	0.905743	39	0.461507	624	-0.0408775	430	0.589572	279	0.10003	275
	-0.712667	212	0.457339	137	-0.577151	560	-0.518645	200	-0.209689	444	0.200578	381	-0.904624	211	0.0805465	1247	0.494857	663	-0.566901	138	0.0952502	838	0.0156316	217
	-0.643675	254	-0.95903	172	-0.18198	602	-0.371461	544	0.979245	248	-0.987818	225	0.34404	211	0.627077	54	-0.0301343	339	0.541289	134	0.432668	556	0.138183	281
	-0.627429	410	0.258434	601	0.232118	159	-0.482833	1396	-0.755967	159	0.187495	194	0.552728	145	-0.0267489	131	0.0468696	233	0.0341841	1007	0.264315	1117	0.396873	170
	0.221181	68	0.0496179	1883	0.506849	335	-0.399276	128	-0.0439234	243	0.488002	87	-0.410169	129	0.407845	186	-0.264327	219	0.502478	222	0.119859	936	0.06863	248
	-0.0436083	149	0.0466503	137	-0.740617	342	-0.824361	239	-0.115295	321	0.106884	2516	0.519293	309	-0.126714	140	0.145373	697	0.0952275	1275	0.974864	187	0.0394689	1615
	-0.525569	405	-0.212633	254	-0.324831	738	-0.804711	2137	0.95896	177	0.0951091	425	0.692341	554	0.0298083	683	0.598918	413	-0.174866	180	0.743867	290	0.819348	108
	-0.54083	415	0.644901	193	-0.451075	277	0.0621683	166	-0.837974	199	-0.188679	379	0.343144	149	0.112789	1013	0.596034	463	0.06863	248	-0.140746	283	-0.827758	176
	-0.141028	253	-0.611215	158	0.975905	21	-0.570118	719	0.974014	218	0.386243	117	0.312564	34	0.688696	127	0.233146	569	-0.479994	259	0.697282	195	0.969885	52
	0.610598	56	0.0218439	327	-0.46884	688	-0.294787	290	0.45421	624	-0.465833	64	-0.613577	267	0.201965	946	0.504828	398	-0.651479	247	0.532301	159	0.985864	38
	-0.29811	274	0.0286445	152	-0.398961	687	-0.495015	208	-0.587287	795	-0.677077	124	0.421159	127	0.502478	222	0.117002	277	-0.735371	236	0.103069	119	-0.143075	665
	0.0324188	431	0.604104	139	-0.657894	669	-0.832424	218	-0.228947	159	-0.119606	197	-0.552868	284	0.0952275	1275	0.906613	194	0.851183	122	0.164713	959	-0.135087	757
	-0.995626	5	0.194276	690	-0.674196	95	-0.593145	4495	0.509831	185	-0.148072	690	0.276766	168	-0.174866	180	-0.430512	195	0.372407	280	0.275685	631	0.984229	92
	-0.232995	2	-0.296511	441	-0.641634	1078	-0.385879	369	-0.701231	354	-0.911119	150	-0.210517	228	0.632739	178	-0.45735	878	0.196185	355	0.259567	828	-0.620404	163
	0.576141	265	0.652347	183	-0.344889	122	-0.72101	348	0.715284	190	0.976407	118	-0.566429	201	0.209366	160	0.922421	134	-0.192197	379	-0.119423	653	-0.44833	460
	-0.158957	418	-0.329861	277	-0.743275	1762	-0.854542	198	0.77151	85	0.527677	581	0.448433	592	0.21112	1068	-0.46293	345	-0.43201	336	-0.720246	124	0.975737	59
	0.947591	25	-0.679866	355	-0.549113	123	-0.663485	5212	0.638437	354	-0.85444	53	0.386814	685	-0.307595	139	-0.559062	816	-0.512623	312	-0.00266436	618	0.620962	643
	0.568845	134	0.833842	285	-0.794778	1622	-0.938913	82	-0.500582	193	-0.411367	639	0.640638	337	0.923926	122	0.953706	62	-0.680604	290	0.913655	975	0.0347373	414
	0.414545	399	-0.217885	1185	-0.47708	159	-0.461032	582	-0.681007	222	-0.781464	108	-0.156293	432	0.675937	216	-0.561395	387	-0.496779	280	0.364131	852	0.794457	120
	-0.995971	26	0.438747	211	0.904904	56	-0.90977	123	-0.899662	88	-0.193197	1121	0.519531	238	-0.355807	28	-0.777055	910	-0.143783	308	-0.222688	789	0.982194	160
	-0.604635	26	-0.315305	386	-0.82815	1363	-0.968685	901	0.526912	137	0.175804	551	0.176189	271	0.308752	74	-0.544998	378	-0.00103667	299	0.397773	114	0.617381	628
	-0.996201	2	0.338816	644	-0.469678	152	-0.854033	1008	-0.130615	179	-0.514204	317	-0.19458	265	0.23215	494	-0.736371	979	0.057314	219	-0.240104	381	0.99479	26
	0.103179	498	-0.814006	211	0.993719	17	-0.790859	344	0.471661	223	0.568211	626	0.333171	892	-0.932389	11	-0.698573	164	0.902145	5	0.812931	250	0.927629	225
	-0.47616	358	-0.0841769	63	-0.668447	1309	-0.749348	132	-0.0777174	90	-0.112916	1170	0.284275	21	0.480882	175	-0.30828	115	0.210811	1063	-0.175556	326	-0.145002	217
	0.279449	135	0.413333	123	-0.196349	66	0.211981	464	0.702841	256	-0.038365	313	0.624865	367	0.364309	293	-0.585552	1224	0.259691	350	0.410626	832	0.821871	657
	0.900896	148	-0.283674	445	0.944613	9	-0.61293	2051	0.918242	9	-0.513817	771	0.531174	422	0.41802	167	-0.614602	431	0.311633	82	0.876625	497	-0.0269765	157
	0.886232	37	-0.268528	298	-0.524074	1258	-0.988875	168	-0.669737	129	-0.131951	2950	0.314278	286	0.627502	53	-0.543586	1250	0.288699	422	0.228413	820	0.741871	565
	0.202413	238	0.265648	129	-0.0109313	126	-0.987708	110	-0.705766	554	-0.317142	846	0.088833	157	0.191487	413	-0.540889	386	0.0202257	359	-0.561633	156	0.448899	195
	-0.260243	345	-0.85854	264	0.497799	37	0.0973572	1	-0.914621	108	-0.405349	884	0.169497	1505	0.617731	81	-0.463678	814	0.981395	35	0.389298	419	0.082675	97
	0.530079	134	0.150721	341	-0.555927	388	0.789993	110	0.341066	189	0.442548	251	-0.617076	162	0.231672	896	-0.399923	341	0.987416	44	0.651806	287	0.865356	200
	0.363079	312	-0.446963	1476	-0.554924	725	-0.816379	124	0.335658	178	0.864049	124	0.538845	1192	-0.576475	3	-0.814175	373	0.118584	372	0.0206805	212	-0.654932	216
	-0.0216327	256	0.64225	206	-0.685588	155	0.784031	29	-0.46118	71	-0.174328	418	0.999909	24	0.510229	144	-0.714932	375	0.51379	83	-0.310713	92	0.369576	103
	0.0698959	130	-0.123957	736	-0.858725	211	-0.423813	45	0.267943	381	-0.474988	1753	0.969855	40	-0.979323	15	-0.748995	147	0.413908	298	0.259551	171	0.931792	177
	0.113483	210	-0.55711	556	0.0279603	194	0.471957	183	-0.833513	107	0.0150526	1730	-0.569479	176	0.460234	117	-0.638034	267	-0.10407	350	-0.534902	126	-0.51796	203
	0.0615155	166	-0.64604	593	-0.892482	58	-0.826789	154	0.716662	152	-0.0165254	14	0.602281	1209	-0.00943339	135	-0.482039	797	-0.21339	142	-0.696049	118	-0.311335	41
	0.0151746	181	0.114541	231	0.0981559	171	0.661958	41	0.380324	236	-0.574668	210	0.999886	2	0.513947	374	-0.80336	421	0.613092	58	0.718748	522	0.526663	193
	-0.991458	9	-0.64615	146	-0.0411408	141	-0.519601	126	-0.779353	6	-0.641359	241	0.985936	12	0.783562	4	-0.272595	84	0.78343	383	0.769374	171	-0.674341	152
	-0.216846	190	-0.654781	375	-0.727074	204	-0.870809	144	0.0853572	569	-0.917556	34	0.62666	1343	0.201412	154	-0.688178	246	0.270927	362	0.84914	208	0.971598	209
	-0.57086	158	-0.081445	406	0.262862	137	0.650692	51	-0.898437	82	-0.541161	160	0.883236	153	-0.211192	107	-0.29257	706	0.196079	392	-0.279239	472	0.73413	156
	0.982991	167	-0.388167	1972	-0.0793137	156	-0.485601	192	0.756726	181	0.864511	133	-0.105179	217	0.702995	515	-0.000378271	98	0.260513	4	0.925278	194	0.968075	160
	-0.125219	163	0.162597	462	0.0381237	136	-0.0592739	78	0.122321	349	-0.0822503	358	0.763795	558	-0.414713	216	0.625184	246	0.568932	910	-0.935127	25	-0.796934	179
	-0.977965	1	-0.232636	1074	0.0786739	124	-0.536294	141	0.0845521	1587	0.220297	389	0.0634499	282	0.666215	275	-0.45053	1394	0.239325	280	0.859323	317	0.986411	229
	-0.361793	254	-0.915894	138	-0.491484	642	-0.677607	169	-0.956905	244	0.923358	147	0.934666	562	0.907892	102	-0.633856	23	-0.0816466	299	0.482851	430	0.785261	146
	-0.307868	135	-0.542639	135	-0.368794	211	-0.325767	113	-0.927902	19	0.04843	181	-0.433899	448	0.716817	143	-0.0758919	434	0.49805	241	0.936229	183	0.662562	366
	-0.195304	167	-0.0183893	69	-0.0425149	221	-0.823073	180	-0.0511171	520	0.215865	23	0.851749	3	0.14898	9	-0.553474	36	0.876504	472	-0.0432195	997	-0.719384	219
	-0.984068	4	-0.837998	107	0.0302817	192	-0.84546	137	0.738718	333	-0.605715	1885	0.943172	110	-0.73407	240	0.767465	324	0.473444	329	0.792657	286	0.980317	142
	0.378563	181	-0.801515	110	-0.448402	779	-0.423249	254	0.724031	392	-0.748968	195	0.243387	625	0.828945	106	-0.691361	1138	-0.988594	12	0.434724	772	-0.158591	603
	-0.207186	352	-0.690664	287	0.456136	131	-0.71622	287	-0.108744	254	-0.0456217	2326	-0.529048	66	0.890761	113	-0.690807	26	0.945276	204	0.0256721	132	0.935419	5
	-0.421196	219	0.101884	255	0.207975	143	-0.610269	539	0.212848	419	-0.959289	317	0.849756	183	-0.936112	148	0.848086	234	0.596907	330	0.00356144	283	0.903256	53
	-0.849296	153	-0.636456	119	-0.407692	204	-0.897032	208	0.847798	255	-0.989629	459	0.10899	321	0.737687	682	-0.498035	1720	0.919402	123	0.0738628	221	0.447394	465
	-0.719517	216	-0.75698	218	-0.823953	795	-0.699682	601	0.665669	375	0.64115	250	0.701269	197	-0.973028	299	-0.271673	82	0.131719	304	0.863776	240	0.573542	681
	0.844265	118	-0.0991653	116	-0.230397	310	-0.789851	446	-0.408913	305	-0.0346758	265	0.279479	316	0.505247	734	0.732532	90	0.219039	459	-0.188505	189	0.937942	85
	0.00860368	205	-0.545447	297	-0.606963	231	0.219101	79	0.881548	133	-0.137265	296	-0.989317	19	0.765985	351	0.898218	109	-0.992726	9	-0.102882	225	-0.623659	146
	0.357966	338	-0.445269	172	-0.888159	819	-0.766261	435	0.914047	182	0.797298	142	-0.976624	56	-0.641696	411	0.143049	258	0.539598	242	0.381367	723	0.327331	220
	-0.614189	232	-0.197786	343	-0.624944	279	-0.598568	124	0.642046	277	-0.99466	361	-0.660667	24	0.592349	555	-0.53878	1487	0.0850129	14	-0.480965	159	0.404349	1018
	-0.615636	160	-0.270803	1898	-0.55485	227	-0.918263	115	-0.422618	430	-0.330578	994	-0.874495	4	0.51461	363	0.443933	86	-0.632113	313	-0.365467	251	0.979136	116
	0.958013	128	-0.272188	706	-0.866086	722	-0.831356	330	0.816464	49	-0.364245	726	0.0466061	170	-0.078804	112	0.947977	230	-0.322978	175	0.730424	375	-0.336373	160
	0.534887	132	-0.379421	514	-0.0238534	242	0.266363	30	0.645354	203	-0.311285	1043	-0.106499	619	0.610019	264	-0.394578	1651	-0.815077	340	-0.149645	287	0.228581	706
	-0.310167	237	-0.45354	232	-0.462998	185	-0.553184	197	0.398487	445	0.213278	1435	-0.13681	428	-0.644827	318	0.886733	64	-0.230451	158	-0.871159	163	0.266554	260
	0.748245	138	0.138929	173	-0.666494	615	-0.677109	540	-0.393654	227	0.468521	222	0.434425	206	0.648044	150	0.973784	157	0.841503	129	-0.558833	262	0.771706	368
	-0.686242	158	0.257578	63	-0.362891	309	0.592601	1	0.687851	8	-0.668293	316	-0.503775	416	0.71327	323	0.00025021	1525	0.714016	219	0.745704	287	0.81152	126
	-0.233958	270	-0.0714868	194	0.603948	371	-0.61381	187	0.990485	16	-0.184359	207	0.0234769	518	0.457517	261	0.974785	53	-0.756965	456	-0.416274	314	0.613512	767
	-0.0749396	523	-0.932045	93	-0.135382	578	-0.777883	580	0.623224	82	-0.538626	122	0.674432	298	0.789402	38	0.977797	178	-0.696409	1	-0.70849	420	0.180127	998
	0.378352	160	-0.552664	168	0.0249134	458	0.669981	3	0.510006	234	-0.989075	248	0.0584051	514	-0.264498	158	0.127413	1402	0.949685	147	-0.604223	234	-0.347882	96
	0.507938	155	-0.691165	123	0.56857	297	-0.886628	726	0.0985096	354	0.423018	168	0.905113	683	0.337981	169	0.994547	90	-0.623918	361	0.72677	210	0.0089455	246
	0.193917	130	0.897765	247	0.0940018	575	0.635597	28	-0.068897	55	0.0655012	853	0.402861	192	0.681652	9	0.993304	108	0.665865	239	-0.428603	427	0.269292	526
	-0.495068	372	-0.34877	300	-0.0220301	225	-0.290864	174	0.910116	89	-0.851742	1569	0.0978116	338	-0.451686	246	0.339154	1182	-0.341454	201	-0.634316	206	0.446958	224
	0.14503	315	0.19077	269	0.908288	227	-0.868607	696	0.573984	321	-0.0672977	1135	-0.20705	124	0.721932	263	0.989493	73	0.115609	315	-0.781084	185	0.0714443	100
	0.927015	136	0.0524559	481	0.218772	937	0.562307	150	0.736788	400	0.18193	1392	0.943184	787	0.737656	337	0.48429	1153	0.717969	166	0.296916	152	0.852646	9
	-0.831374	133	-0.0365604	1572	-0.374721	264	-0.848032	164	0.878853	294	0.599581	175	0.0558821	278	0.659463	333	0.998811	74	0.182422	305	0.361457	236	-0.0745532	263
	-0.181805	233	-0.11518	680	0.806251	212	-0.877715	489	-0.251996	167	-0.302308	48	0.999867	1	0.980232	12	0.976179	59	-0.948608	1	-0.0871919	53	-0.220229	552
	-0.164826	338	0.0220992	562	0.204091	766	0.492159	213	0.83268	201	0.29255	171	0.423186	257	-0.0585077	184	-0.617076	162	0.541555	158	-0.513389	138	0.272257	725
	-0.0654962	166	-0.490649	107	-0.677647	232	-0.791759	168	-0.994795	26	0.00455295	744	0.552132	168	0.772285	325	0.538845	1192	0.42151	125	-0.795618	282	-0.00103667	299
	0.185564	129	0.897765	170	-0.885732	147	0.761307	119	-0.0165927	248	-0.869814	1469	0.969778	720	0.105212	404	0.999909	24	0.0429021	149	0.374932	54	0.057314	219
	0.37996	321	0.220054	261	0.719129	167	-0.944973	414	0.972913	133	-0.0801039	890	0.196942	297	0.167495	6	0.969855	40	0.28302	153	0.851613	219	0.902145	5
	-0.544	188	-0.857852	54	0.0263443	773	0.672201	349	-0.993522	67	0.119678	795	0.16485	392	-0.292754	324	0.388264	1046	-0.642677	239	0.181048	157	0.210811	1063
	-0.628437	272	0.0925959	162	-0.510076	1333	0.425669	72	0.108058	335	-0.206595	940	0.992255	659	-0.00287217	428	0.920249	192	-0.19569	171	-0.564845	278	NaN	NaN
	0.469813	138	-0.342706	166	-0.678322	1313	-0.942096	350	0.278801	169	-0.89884	22	0.134565	408	0.7937	336	-0.130862	203	-0.826506	146	0.122481	253
	0.256027	207	-0.230333	130	-0.676332	1424	0.554529	577	-0.857797	46	-0.0904195	924	0.116643	412	-0.726186	271	0.203342	1007	0.933867	34	0.625933	312
	-0.136912	140	0.0813479	128	-0.896923	121	0.602867	267	0.29184	469	0.173227	281	0.917791	657	-0.361344	547	0.559693	399	-0.222158	170	0.596543	128
	-0.139459	415	0.189763	152	-0.470902	1435	0.000183714	105	0.117681	191	-0.364354	293	0.212258	193	0.366825	259	0.650452	165	0.0295728	174	-0.732636	69
	-0.0956668	499	0.714101	388	-0.880723	57	-0.927265	300	0.16896	211	-0.89769	568	0.122899	442	-0.763883	793	-0.360142	315	0.602888	123	0.77444	435
	0.100099	174	0.219166	411	-0.374581	1294	0.496442	165	-0.0373958	331	-0.825459	280	0.787524	552	-0.299327	378	-0.438179	264	-0.754534	106	-0.395441	219
	0.056038	548	0.0309775	1449	-0.286302	231	0.188443	286	0.326355	415	-0.252246	186	0.0648453	632	0.691992	34	0.378854	479	0.840828	25	-0.800057	237
	0.106815	159	0.263321	331	-0.954573	104	-0.992011	145	0.912084	92	0.106499	584	0.0632656	375	-0.85246	716	0.0438569	180	-0.246783	236	0.735093	258
	0.392865	668	0.276965	903	-0.974685	50	-0.183805	31	0.0581786	412	-0.972499	289	0.112403	402	-0.24096	298	-0.045109	111	0.198749	176	-0.89208	36
	0.222647	160	0.32546	669	-0.334076	548	-0.738733	158	0.123931	481	-0.249104	1183	0.715475	482	0.672169	58	-0.992505	9	0.304718	199	-0.134595	292
	0.416571	664	-0.853829	26	-0.215889	498	0.0467032	21	0.947447	58	-0.664705	15	0.0614296	377	0.542754	107	-0.962351	119	-0.411153	1	-0.614862	224
	-0.53515	198	-0.0918476	92	-0.585906	740	-0.852428	179	0.117956	390	0.0935825	486	0.0226753	395	0.582412	132	-0.38848	528	0.163707	263	-0.728785	23
	-0.0646599	151	-0.388077	168	-0.995012	126	-0.383801	171	-0.308073	665	0.591727	768	0.549972	361	-0.870969	529	0.42951	642	0.140484	465	0.719914	198
	0.2475	441	0.0913212	136	-0.622908	540	-0.742865	29	0.118413	366	0.10131	796	0.697591	401	-0.143783	308	-0.139871	404	0.0702663	255	-0.662678	208
	-0.361848	264	-0.0450446	193	-0.0133895	273	-0.962782	125	-0.637325	574	-0.955106	205	0.0333705	301	-0.250316	282	0.650386	153	NaN	NaN	-0.181874	475
	-0.108857	112	0.665686	47	-0.617645	113	-0.287371	198	0.678653	442	-0.0429199	678	-0.0511171	520	0.587886	22	-0.954325	38			-0.422083	1
	0.00625685	197	0.344141	114	-0.876114	105	-0.364115	85	-0.674474	686	-0.347619	52	0.738718	333	-0.0816435	5	-0.205755	431			0.171295	276
	0.536555	141	0.0360435	396	-0.996499	177	-0.418358	11	-0.784972	142	0.115087	153	0.724031	392	0.588358	109	0.0285272	280			0.560178	183
	0.330668	260	0.335309	376	-0.231315	424	-0.954786	98	0.310771	287	-0.812331	133	-0.108744	254	0.20068	245	-0.16828	649			-0.740195	280
	-0.25163	245	0.186548	1469	-0.0509949	264	-0.248401	247	-0.548141	527	-0.755794	24	0.30557	325	-0.387489	319	-0.158031	447			-0.733848	254
	-0.902766	27	0.445295	295	-0.402071	226	-0.933501	139	0.268444	191	0.0302794	645	-0.164052	4	-0.35836	550	0.94878	97			0.161251	9
	-0.894039	136	0.183993	906	0.903206	354	-0.629403	8	-0.572764	115	0.0328383	2520	0.177722	260	0.457236	164	-0.805351	37			0.327036	134
	0.751363	216	0.562472	491	-0.931056	142	-0.705506	128	-0.369529	384	0.0420398	1271	0.51628	335	-0.530498	118	-0.470932	1114			0.465098	155
	-0.431767	190	0.789421	401	-0.206816	491	-0.500528	210	0.395391	327	-0.876561	203	-0.979467	316	-0.613133	294	-0.719983	607			-0.579956	120
	-0.868487	30	0.123891	14	0.947959	260	-0.928632	67	0.0827981	125	-0.700903	306	0.365737	239	-0.746866	109	0.795024	49			-0.858105	393
	-0.231438	283	0.284463	57	-0.888179	123	-0.976894	145	0.325174	73	0.657398	401	-0.645726	19	-0.613536	355	-0.755063	49			-0.879905	89
	-0.500591	111	0.220666	177	-0.967582	124	-0.723495	22	0.557404	133	-0.331074	1161	0.189196	317	-0.747047	359	-0.526228	806			-0.54714	118
	0.143339	251	-0.20099	3	-0.826603	124	-0.395311	199	0.930543	178	-0.496495	1457	0.448539	200	-0.677337	278	-0.556258	792			0.512865	93
	-0.88545	31	0.140772	141	0.116965	299	-0.978637	170	-0.143636	113	0.381761	855	-0.9902	236	-0.367782	260	0.649985	63			-0.485348	107
	-0.0761021	287	0.571034	103	0.974928	141	-0.994208	9	-0.399411	383	-0.24252	2044	0.25596	3	-0.875139	107	-0.755647	118			-0.907301	570
	0.265875	155	0.819239	149	0.151555	170	0.889481	44	-0.872851	8	-0.304239	704	0.171078	531	0.304718	199	-0.184937	366			0.636628	43
	-0.583106	100	0.934931	221	0.989105	50	-0.979564	227	-0.413998	323	-0.496917	1701	-0.0925025	207	-0.411153	1	-0.536667	628			0.9536	160
	-0.902984	151	0.139376	138	-0.616507	150	-0.711572	29	-0.937091	15	0.612584	93	-0.970298	300	0.163707	263	-0.363701	353			-0.818672	787
	0.500755	137	0.978455	165	-0.95653	49	0.22195	211	-0.743054	124	0.969203	55	0.753671	188	0.140484	465	0.19522	93			0.874679	222
	-0.755851	98	0.217892	210	-0.723433	170	-0.954781	184	-0.975387	11	0.585243	1503	-0.575583	278	0.0702663	255	-0.782501	148			-0.681174	940
	-0.0237482	350	0.960315	7	-0.98245	27	-0.987207	2	-0.997441	33	-0.384235	2167	0.0246753	217	0.183424	138	0.271752	291			0.940945	38
	-0.910003	139	0.777223	24	-0.904823	223	0.635616	225	-0.789767	1	-0.56906	183	-0.976261	255	0.369029	9	0.546049	32			0.865996	283
	-0.211115	339	0.979243	191	0.745206	32	-0.966486	185	-0.969489	50	-0.831368	82	-0.21021	127	0.0787611	330	-0.598694	683			-0.774655	1226
	-0.823461	224	0.203018	210	-0.448779	260	-0.620526	112	-0.834967	60	-0.482853	822	0.89198	162	-0.0309817	475	-0.278303	415			0.845289	1
	-0.377648	297	0.949529	44	-0.973465	404	0.288118	210	-0.5779	38	0.0918598	329	-0.630318	260	-0.924284	211	0.00898309	94			0.873475	310
	-0.563546	211	0.223904	158	-0.982505	16	0.384731	121	-0.509219	26	-0.167968	746	0.12355	150	0.585087	32	-0.844424	191			-0.404774	1206
	-0.484602	327	0.803427	143	0.994433	100	-0.960467	168	-0.775224	11	-0.302551	846	-0.994721	281	0.00186446	298	0.624229	43			0.747935	7
	-0.74126	113	0.987624	173	-0.928809	151	-0.862925	255	-0.95772	87	0.601733	839	0.934154	186	-0.752077	254	-0.502176	606			0.426471	254
	-0.862445	106	-0.0297844	221	-0.981802	455	-0.396783	255	-0.369441	3	-0.383121	1322	-0.536733	172	-0.647857	181	0.205481	530			0.899021	228
	0.873209	160	0.977656	109	-0.0129541	309	-0.189289	166	-0.953584	88	0.359032	207	-0.230884	311	0.426066	147	-0.305389	105			-0.518332	870
	-0.293144	332	-0.442802	210	-0.933688	125	-0.752312	117	-0.977108	8	0.111841	398	-0.965443	204	-0.504859	414	-0.907844	277			0.906613	194
	-0.897447	165	0.125643	87	-0.306815	198	-0.743524	191	-0.95063	65	0.814986	15	-0.800859	86	0.481145	111	-0.517285	635			-0.430512	195
	-0.678819	189	0.986409	162	-0.974881	317	-0.0709982	325	-0.980647	8	-0.391262	425	-0.991713	233	0.0706963	721	0.42725	327			-0.45735	878
	0.264985	281	-0.496207	206	-0.979856	170	-0.804442	157	-0.808087	45	-0.291026	310	-0.849799	153	-0.609567	596	-0.509189	156			-0.507417	179
	-0.914039	213	0.777255	132	0.765754	287	-0.368517	444	-0.96698	18	0.268116	125	-0.650922	205	-0.811579	116	-0.925989	326			0.655984	179
	-0.313585	246	0.982579	119	-0.865045	395	-0.699911	185	-0.511667	47	-0.356691	1397	-0.339387	530	0.354994	151	0.299474	267			0.54568	161
	-0.094909	175	-0.866786	175	-0.721301	12	-0.357798	351	-0.862603	56	0.190486	637	-0.217222	256	-0.629027	276	0.680782	213			0.191873	54
	0.0578751	126	-0.564862	83	0.79459	269	-0.604888	140	0.396685	44	-0.271106	1284	-0.34161	301	-0.0951249	639	-0.560527	431			-0.283115	382
	0.180585	136	0.879993	185	-0.877885	421	-0.462695	249	-0.904803	63	-0.628991	71	0.564914	62	-0.696103	174	-0.888109	363			-0.745704	143
	-0.123891	14	-0.756214	211	0.813949	155	0.352843	139	-0.528704	191	0.501235	150	-0.540753	123	0.29076	273	0.585369	256			0.683565	123
	-0.284463	57	0.816598	174	-0.632855	532	-0.744868	97	-0.342068	122	0.903878	3	-0.220083	450	0.299421	679	0.8754	225			-0.417753	176
	-0.220666	177	0.975162	144	-0.113606	174	-0.172787	124	-0.755916	252	-0.921853	111	-0.944721	204	-0.646586	652	-0.387765	344			-0.0858683	404
	0.20099	3	-0.912277	154	-0.733848	156	-0.207252	375	-0.998349	1	0.661905	131	-0.841149	810	0.221937	492	0.13757	106			-0.400871	233
	-0.140772	141	-0.304297	9	-0.635867	11	-0.641748	406	-0.685588	155	-0.656279	92	-0.850667	1081	-0.953781	154	-0.342219	359			0.669676	202
	-0.571034	103	0.129763	158	0.102528	217	0.103582	115	-0.858725	211	-0.203751	586	0.0722233	61	0.326936	206	-0.132278	120			0.952812	143
	-0.819239	149	-0.848226	180	-0.806853	206	-0.914149	131	0.231122	78	-0.486519	207	-0.743702	319	-0.0300466	171	0.621686	222			-0.381773	195
	-0.934931	221	-0.461001	147	-0.354369	14	0.087407	150	-0.9168	64	-0.533936	375	-0.919451	600	0.966009	115	0.33351	591			-0.677186	453
	-0.139376	138	-0.892566	69	-0.0720399	101	0.301161	158	0.843142	147	0.0473029	643	-0.182791	40	-0.0974562	46	0.282938	356			0.575758	302
	-0.978455	165	0.192704	240	NaN	NaN	0.70857	153	0.136282	157	-0.187599	1109	-0.551648	380	0.334246	376	0.03248	160			-0.349612	284
	-0.217892	210	-0.863702	144			0.790083	127	0.396327	1013	0.762076	423	0.0282444	69	-0.802347	438	0.7998	174			-0.656086	739
	-0.960315	7	0.193485	332			0.872064	9	-0.866019	57	-0.18844	623	-0.913714	570	-0.56417	416	0.132861	264			0.255754	138
	-0.777223	24	-0.420043	218			0.323712	115	0.79055	91	-0.401192	218	-0.253532	63	0.327043	339	0.270938	216			-0.494023	225
	-0.979243	191	-0.811978	110			-0.0730456	23	-0.0910484	199	-0.814382	220	-0.586877	124	-0.0135601	26	0.36335	425			-0.739573	664
	-0.203018	210	0.301935	223			-0.24673	122	0.514561	1041	-0.334053	119	0.230989	145	-0.984829	96	-0.099216	179			-0.0495726	298
	-0.949529	44	0.179078	414			0.981577	34	-0.490042	140	-0.147371	333	-0.142041	141	0.458802	958	0.776539	165			-0.944619	112
	-0.223904	158	-0.388617	221			-0.614029	569	0.741378	47	-0.270934	1121	-0.879986	600	-0.794666	287	-0.0194973	267			-0.737782	169
	-0.803427	143	-0.695371	100			0.925718	42	0.00836587	227	-0.109986	1462	-0.323828	17	-0.650131	377	0.388382	224			-0.557965	714
	-0.987624	173	0.0915199	214			-0.717922	1345	0.126596	692	0.05771	1554	0.479357	135	0.259735	669	0.491568	310			-0.195185	380
	0.0297844	221	0.26163	440			0.687531	129	0.6459	275	-0.130469	874	-0.142211	69	-0.830683	67	0.146589	337			0.678855	89
	-0.977656	109	-0.419738	257			0.942977	34	-0.336997	429	-0.200245	888	-0.776458	606	0.0330606	150	-0.0611638	223			-0.914627	103
	0.442802	210	-0.596255	53			-0.967643	81	-0.671313	182	0.542754	107	0.966684	70	-0.950922	278	0.159493	124			-0.727981	343
	-0.125643	87	0.206025	192			-0.740298	2413	0.793807	30	0.582412	132	0.629878	11	0.493384	596	0.220647	324			-0.155829	358
	-0.986409	162	0.15979	422			-0.870208	371	0.883889	308	-0.870969	529	-0.585565	482	0.0653701	199	0.600939	643			0.629559	555
	0.496207	206	-0.409856	155			-0.89772	534	0.687265	220	0.142932	151	-0.399411	383	-0.399415	293	-0.259294	137			-0.741561	155
	-0.777255	132	-0.679967	35			0.964861	55	-0.571515	172	-0.074315	68	-0.872851	8	-0.780471	245	0.168787	312			0.389863	210
	-0.982579	119	0.0924925	244			-0.957224	596	-0.126299	82	0.424877	138	-0.827417	38	-0.657807	449	0.483243	804			-0.0570889	199
	0.866786	175	-0.330944	415			-0.422933	326	0.88751	361	-0.931152	174	0.767314	161	-0.951987	150	-0.878496	246			0.687253	683
	0.564862	83	0.0964404	262			-0.608631	2150	0.813959	183	-0.447851	182	-0.940953	28	-0.107352	435	-0.226332	2			-0.515098	436
	-0.879993	185	-0.284914	466			-0.253169	451	0.0083524	328	-0.847985	4	0.369179	1743	-0.425629	204	0.30557	325			0.652672	138
	0.756214	211	0.501802	184			-0.374097	393	-0.534019	117	0.20096	255	0.259981	40	-0.245197	768	-0.164052	4			-0.0113823	138
	-0.816598	174	0.628437	272			-0.686133	1583	-0.185951	54	0.287512	229	0.204173	381	-0.331065	532	0.177722	260			0.595404	943
	-0.975162	144	-0.469813	138			-0.74716	1211	0.108657	555	0.415022	148	-0.736121	35	-0.22262	864	0.51628	335			-0.242389	351
	0.912277	154	-0.256027	207			-0.746507	517	-0.461827	161	-0.363621	239	0.020187	306	-0.971981	2	-0.979467	316			0.233957	172
	0.304297	9	0.136912	140			-0.496552	356	-0.930136	133	0.0710237	326	0.200054	712	-0.117141	134	-0.556825	165			0.660227	824
	-0.129763	158	0.139459	415			-0.762866	984	0.33594	591	-0.934361	68	0.667282	55	-0.937451	181	0.541103	986			0.0362594	510
	0.848226	180	0.0956668	499			-0.776918	627	0.373246	125	-0.723585	140	-0.0870812	559	-0.986095	82	0.422378	1705			0.611242	362
	0.461001	147	-0.100099	174			-0.778393	665	0.42697	311	-0.433506	205	0.975554	8	-0.675713	572	-0.19391	277			0.070686	702
	0.892566	69	-0.056038	548			-0.655122	231	-0.703058	158	-0.228967	416	-0.0838263	279	-0.364221	304	0.498439	718			0.0736499	746
	-0.192704	240	-0.106815	159			0.858886	77	-0.350542	481	-0.949063	122	-0.0308885	433	-0.374131	342	0.424495	921			0.495545	203
	0.863702	144	-0.392865	668			-0.634817	845	0.204177	206	-0.701436	482	-0.037085	590	-0.987345	4	0.427264	862			0.0886415	928
	-0.193485	332	-0.222647	160			-0.678337	543	-0.552415	340	-0.670415	533	-0.637334	37	-0.628443	2	0.622479	558			0.658526	170
	0.420043	218	-0.416571	664			0.0141048	109	-0.355645	334	0.810862	140	0.187268	227	-0.953158	137	0.0669274	458			-0.258787	541
	0.811978	110	0.53515	198			-0.685059	1581	0.468541	218	-0.752246	1001	-0.0826662	395	-0.92652	98	0.312182	1217			0.736347	197
	-0.301935	223	0.0646599	151			0.13293	253	-0.986333	41	0.803092	140	0.375648	756	-0.512706	311	0.479982	622			-0.223659	360
	-0.179078	414	-0.2475	441			-0.181975	35	0.127821	278	-0.836475	1005	0.292238	402	-0.767904	355	0.288876	112			0.569912	164
	0.388617	221	0.361848	264			-0.796619	1618	-0.455028	137	0.0461577	243	0.151313	149	-0.689824	112	0.61526	309			-0.330738	167
	0.695371	100	0.108857	112			-0.0896111	127	0.734788	16	-0.989785	59	0.308567	877	0.366774	21	0.8519	253			0.707193	223
	-0.0915199	214	-0.00625685	197			-0.00390156	453	-0.217109	132	-0.875076	748	0.880886	138	-0.00656396	7	-0.0245461	556			0.000724473	115
	-0.26163	440	-0.536555	141			-0.852385	2	-0.150862	203	-0.77627	261	0.296959	223	-0.500211	123	0.203895	1424			-0.45056	60
	0.419738	257	-0.330668	260			-0.860377	1505	-0.299105	212	-0.909917	551	-0.849044	132	-0.94306	93	0.4561	447			0.603368	720
	0.596255	53	0.25163	245			-0.237883	333	0.850135	72	-0.162518	356	-0.319398	394	0.250738	189	0.257806	432			0.346137	106
	-0.206025	192	0.902766	27			-0.00482167	58	0.414242	26	-0.919706	1	0.371537	753	-0.48307	904	0.0863524	1546			0.388264	1046
	-0.15979	422	0.894039	136			-0.473795	1	-0.686993	201	-0.824807	649	0.659566	379	-0.597469	131	0.295093	429			0.920249	192
	0.409856	155	-0.751363	216			-0.356967	1	0.0108481	206	-0.382252	324	0.131727	28	0.236668	300	0.775338	426			0.782802	854
	0.679967	35	0.431767	190			0.81899	14	-0.814039	108	-0.832262	517	-0.324653	209	0.497839	40	0.594513	149			-0.0899035	1428
	-0.0924925	244	0.868487	30			-0.862709	1926	-0.135486	454	-0.606441	243	0.30662	163	0.902156	3	0.160307	1843			0.370842	1365
	0.330944	415	0.231438	283			-0.106612	162	-0.155005	15	-0.910661	116	-0.679413	32	-0.814037	116	-0.00458337	375			0.327093	306
	-0.0964404	262	0.500591	111			0.575118	152	-0.339106	1038	-0.814914	194	0.290416	132	0.813285	91	0.591241	174			0.804078	951
	0.284914	466	-0.143339	251			-0.775389	3130	0.58309	1	-0.567677	29	-0.782772	216	-0.000835029	148	-0.0959199	276			0.566266	209
	-0.501802	184	0.88545	31			-0.66209	423	-0.682285	154	-0.721503	282	-0.132687	527	0.0591166	337	0.170541	1124			0.0454274	1467
	0.254704	32	0.0761021	287			0.513132	152	-0.945804	180	-0.231066	258	0.605807	427	-0.155208	296	-0.0853626	502			0.292725	753
	0.455026	260	-0.265875	155			-0.745657	3107	0.256445	186	0.362885	12	-0.179615	389	-0.766301	146	0.626914	517			0.361454	196
	0.894627	467	0.583106	100			-0.545663	269	-0.166397	235	-0.956665	191	0.116307	107	0.132178	255	0.525106	323			0.573886	1300
	-0.00128136	349	0.902984	151			-0.118692	116	-0.0498677	669	-0.37093	343	-0.904972	194	0.127681	471	0.124822	809			-0.989591	181
	0.698263	225	-0.500755	137			-0.130604	51	-0.859574	129	0.685774	1	-0.129481	750	-0.260856	160	0.499666	426			0.694649	1548
	-0.280809	1377	0.755851	98			0.325695	160	-0.946564	3	-0.976406	164	-0.00233234	703	-0.734076	226	0.287215	370			0.755948	681
	-0.448697	68	0.0237482	350			-0.827489	3018	-0.618284	158	0.122849	216	-0.954034	89	-0.858036	254	0.721066	199			0.711121	587
	0.278007	221	0.910003	139			-0.75301	3061	0.438544	460	-0.997499	137	0.603225	269	-0.462294	273	-0.058931	281			-0.632007	260
	0.732106	220	0.211115	339			-0.758874	225	-0.964759	112	-0.994059	149	0.0759465	656	0.216833	160	0.196396	224			0.499737	1688
	0.890081	415	0.823461	224			-0.709962	2617	-0.846491	208	-0.959639	216	-0.374593	475	0.418386	291	0.602925	1022			-0.77445	291
	-0.322533	388	0.377648	297			0.0974572	295	-0.742497	16	0.985583	12	-0.962596	141	-0.14006	240	-0.261102	283			0.58265	2702
	0.288431	254	0.563546	211			-0.744637	2425	-0.700993	243	-0.987708	110	0.899216	219	-0.777953	237	0.690854	184			0.209244	292
	-0.589001	1123	0.484602	327			-0.527795	46	-0.988484	179	0.0973572	1	0.152843	242	0.64664	222	-0.364296	85			-0.757956	167
	0.808506	140	0.74126	113			-0.664531	1439	-0.97527	179	-0.875139	107	-0.675519	150	0.263465	491	0.507299	1804			0.420954	478
	0.819749	245	0.862445	106			0.364497	564	-0.378624	207	0.80439	17	0.442014	729	-0.17937	207	-0.77636	131			0.501523	1024
	0.586454	449	-0.873209	160			NaN	NaN	-0.0139424	243	0.669869	49	-0.475658	296	0.566493	239	-0.249102	426			0.812446	792
	-0.179693	475	0.293144	332					-0.622908	540	-0.702331	232	-0.796174	158	-0.484911	158	0.170732	47			-0.0600868	182
	-0.634354	366	0.897447	165					-0.0133895	273	0.629649	83	-0.856989	151	0.75229	191	-0.27955	235			-0.974464	25
	-0.791634	802	0.678819	189					NaN	NaN	-0.838709	272	-0.361523	96	0.304135	780	0.225574	517			0.231097	202
	0.803018	263	-0.264985	281							0.659936	108	0.784815	695	-0.904985	30	0.650181	1059			0.486446	221
	-0.168338	673	0.914039	213							-0.834231	307	0.332469	680	NaN	NaN	0.596409	270			0.0658158	678
	-0.671731	124	0.313585	246							0.680642	95	0.905341	42			-0.480298	78			0.794302	835
	0.130366	428	0.094909	175							-0.813079	274	-0.804307	99			-0.749445	304			0.382116	440
	0.886974	112	-0.0578751	126							0.213537	111	0.957981	316			0.657073	368			0.105365	222
	0.031311	923	-0.180585	136							-0.797619	262	0.533202	652			0.174745	946			0.0379833	618
	0.28958	136	0.928018	11							-0.297155	150	-0.922568	107			-0.829716	36			-0.075251	713
	-0.15853	685	-0.12959	112							-0.723244	249	-0.83647	108			-0.476075	279			0.313206	231
	-0.616552	225	0.948495	220							-0.778916	198	0.967012	2			-0.812001	398			0.545187	548
	0.358252	582	-0.0927333	275							0.363646	65	0.938197	338			0.652735	707			0.239432	432
	-0.988558	3	-0.849366	120							-0.708354	240	0.509211	481			-0.0707067	558			-0.0190128	630
	0.50824	139	-0.141656	233							-0.746379	299	0.0985145	85			-0.476821	97			0.147679	195
	-0.242012	536	0.854941	207							-0.76123	197	-0.729772	261			-0.0849946	218			0.522385	201
	-0.626677	276	0.459285	147							-0.542008	74	0.664772	229			-0.595504	363			0.272577	1584
	0.497378	49	0.10747	327							0.123267	16	0.280256	716			0.82913	212			0.00703004	75
	0.14218	607	-0.973734	67							-0.856928	156	0.179874	218			0.433389	147			0.26708	481
	0.470699	294	-0.0241837	185							-0.655385	135	0.796975	12			0.914519	422			0.472518	215
	-0.113552	670	0.689492	267							-0.992011	145	-0.188058	199			-0.0258619	481			0.151258	145
	-0.0165091	555	0.553912	3							-0.183805	31	0.2071	953			-0.94773	2			0.820569	673
	-0.358579	189	0.177912	237							-0.738733	158	0.227995	300			0.509831	2149			-0.135139	79
	0.165848	23	-0.993998	28							0.0467032	21	0.41146	175			-0.69796	138			0.373732	773
	-0.27592	603	-0.0865529	229							-0.852428	179	-0.358525	129			0.580159	2385			0.717295	212
	0.496245	380	0.84404	194							-0.17937	207	-0.421179	150			0.565236	230			0.332844	113
	0.210788	42	0.59249	86							0.566493	239	0.820335	267			0.61273	2164			0.667335	1297
	0.728415	537	0.372642	190							-0.484911	158	0.666646	212			0.745583	667			0.568149	122
	-0.462634	357	-0.994353	41							0.75229	191	-0.869172	9			-0.940092	12			0.753684	588
	0.343909	23	0.256285	212							0.304135	780	0.0714164	152			0.22526	1053			0.364726	456
	-0.370758	349	0.268895	463							-0.904985	30	-0.449012	503			-0.827417	38			0.963816	583
	-0.3921	13	-0.0181249	47							0.8343	56	0.829142	220			0.767314	161			0.634778	108
	0.412924	707	-0.989391	27							-0.610297	163	0.925424	170			-0.940953	28			0.827961	612
	0.790361	647	0.0203899	152							0.711143	151	0.088476	54			0.369179	1743			0.794445	570
	-0.0636558	444	0.635996	306							-0.0434281	651	-0.471691	419			NaN	NaN			0.833729	455
	-0.805319	37	-0.118786	504							-0.476248	28	-0.0256137	90							0.702624	236
	-0.100442	261	0.173674	129							0.367904	182	0.202783	55							0.843531	1527
	-0.607307	208	0.838536	445							-0.299705	581	0.813631	104							0.647256	700
	0.562353	476	-0.0610065	646							0.0399234	9	0.132884	808							0.913281	145
	0.742009	770	0.263212	175							0.806225	131	0.231122	78							0.683042	1755
	0.0853272	826	0.218777	78							0.343383	59	-0.9168	64							0.912227	12
	-0.0495758	417	0.184488	252							-0.279509	988	0.843142	147							0.601798	552
	-0.330968	186	-0.188769	170							0.700948	40	0.136282	157							0.505088	259
	0.128144	591	0.906403	429							0.289281	23	0.396327	1013							0.665566	730
	0.683705	942	-0.0387528	579							0.637057	53	NaN	NaN							0.421044	377
	-0.0873165	465	0.266954	216							-0.30319	848									0.848133	703
	-0.212383	349	0.378547	115							0.81565	21									0.414343	602
	-0.084031	496	0.913112	219							-0.543927	335									0.903282	265
	-0.943894	58	0.182515	352							0.309141	382									0.383084	913
	0.809792	705	0.940491	203							-0.37765	69									0.929669	330
	-0.0337813	830	0.672173	630							0.15424	624									0.308355	916
	-0.245922	329	-0.0935705	181							0.467991	74									0.554977	234
	-0.291651	115	0.975959	165							-0.836572	313									0.628111	272
	0.938734	414	-0.0588236	329							0.446155	244									-0.990452	39
	-0.109007	826	0.897872	218							0.39573	141									-0.0899257	57
	0.274908	417	0.159349	614							-0.682001	562									0.249759	677
	0.0221681	205	0.248824	156							0.935443	179									0.892477	601
	-0.406591	227	0.993417	133							0.431292	861									-0.249357	73
	0.959111	468	0.632086	192							0.883462	237									0.511699	1020
	0.229684	978	0.798064	167							0.568465	287									0.928134	268
	0.541245	252	-0.148895	436							0.0384844	363									0.757086	322
	0.583064	1037	-0.00950432	235							0.946316	176									-0.569091	156
	0.625626	1576	-0.846248	53							0.40582	668									-0.206436	149
	0.396975	428	0.731475	150							0.491998	174									0.114627	412
	0.895073	115	0.102178	137							0.632362	613									-0.556825	165
	0.14611	108	-0.188236	405							0.0368701	591									0.541103	986
	-0.378871	191	0.278398	132							0.339176	491									0.422378	1705
	0.690581	815	-0.848853	75							0.928303	180									NaN	NaN
	0.653098	245	-0.357402	140							0.224849	122
	0.931189	553	-0.266501	243							0.453574	329
	-0.113559	104	0.289531	153							-0.0911705	502
	0.735219	261	0.535354	54							0.916034	9
	-0.0795252	128	-0.531725	1							0.48181	471
	0.715194	281	0.165079	242							0.142067	448
	0.618803	356	0.922273	126							-0.678361	129
	0.63975	615	0.888439	149							0.564465	104
	0.896592	124	0.177697	268							0.156992	215
	-0.440956	204	-0.451687	241							-0.0442029	374
	0.623521	558	0.659744	179							0.968475	30
	0.58122	596	-0.810256	126							0.521086	221
	-0.275617	900	0.721772	125							0.419028	139
	0.624033	397	0.16363	145							0.0297908	455
	0.598846	881	-0.227569	119							0.206924	134
	-0.698184	189	NaN	NaN							0.937253	39
	-0.405084	535									0.0668699	294
	NaN	NaN									-0.833289	471
											0.2492	205
											-0.457199	703
											-0.14445	274
											-0.946571	367
											-0.00487891	423
											-0.709966	832
											-0.821673	510
											-0.935115	299
											0.126104	283
											-0.896502	276
											-0.0565339	155
											-0.965016	346
											-0.9488	505
											-0.786158	324
											-0.401074	266
											-0.940263	119
											-0.143774	130
											-0.92526	208
											-0.476321	614
											-0.139827	262
											-0.456345	265
											-0.970103	37
											-0.391076	245
											-0.904436	260
											-0.557348	881
											-0.75978	230
											-0.260142	824
											-0.0179813	211
											-0.858892	1259
											-0.379069	155
											0.798249	137
											-0.168799	519
											-0.839262	1233
											-0.614029	569
											0.925718	42
											-0.717922	1345
											NaN	NaN
