# Supplementary material for: Cortical waves mediate the cellular response to electric fields
Source: eLife. 2022 Mar 23;11:e73198. doi: 10.7554/eLife.73198 (PMC8942472; doi:10.7554/eLife.73198)
Supplement: Figure 4—source data 1. — Related to Figure 4a–c. [file elife-73198-fig4-data1.xlsx]

## Sheet: Sheet1
Figure 4- Source Data 1
Figure 4a-c: Wave area and wave x position relative to the cell center (normalized by cell radius) in different periods of electrotaxis experiment.
P0 : no EF			P1 : 3 min before EF reversal			P2: 0- 3 min after EF reversal			P3: 3- 6 min after EF reversal			P4: 6- 9 min after EF reversal			P5: 9- 12 min after EF reversal
X position	Area (µm^2)		X position	Area (µm^2)		X position	Area (µm^2)		X position	Area (µm^2)		X position	Area (µm^2)		X position	Area (µm^2)
1.08494	11.2204		0.811226	9.90036		-0.0150339	6.82025		1.22531	9.94437		-1.04648	10.3844		-0.623625	6.82025
0.308698	26.049		-1.36318	23.8489		0.722246	40.1295		-1.65341	10.1204		-0.0441941	22.2208		-0.0938546	17.6006
1.25497	8.40431		-1.21893	10.8684		-0.670063	62.7463		0.72535	10.0324		1.49945	6.55624		1.30322	11.0004
0.130364	8.75632		0.092756	5.19219		0.34064	20.5488		0.62949	14.4325		0.152567	25.1689		0.141284	7.48027
-0.474801	17.9087		0.746129	7.34827		0.709909	64.3304		1.4068	6.02822		0.717544	6.95226		0.707967	6.29223
0.500021	13.2005		0.356892	5.67621		0.492934	26.489		0.412673	40.4375		-1.13283	65.2544		-1.10555	11.9684
0.361562	7.17226		0.671615	8.2283		1.38052	21.7368		0.325665	6.33623		-1.53135	6.46824		-0.982816	11.1324
0.451658	9.50435		0.724636	25.8289		-1.03469	8.00829		0.629779	20.5928		-1.19432	10.6924		-0.0927073	11.1324
-0.103945	15.2246		-0.486184	8.66832		-0.506929	9.41635		-0.341149	18.7447		-0.64704	25.0809		-0.787428	11.7044
0.96455	5.23619		-1.31896	12.3205		-0.23429	6.46824		0.120262	16.0166		-0.417496	36.5213		-0.261414	210.812
0.496776	37.2254		0.542251	9.50435		-0.986429	4.88418		-0.491328	24.1569		-0.269064	15.4446		1.18591	36.7414
0.821669	182.431		-0.0200677	27.809		-0.0781513	32.0772		-0.421824	11.2644		-0.89184	12.1444		0.204391	26.709
0.710187	10.9564		0.268262	6.16023		-0.237591	11.7924		0.507681	5.23619		0.85118	21.8688		-0.974231	12.5405
-0.225369	128.045		0.246552	13.2885		-1.47061	26.313		-0.156194	10.5164		1.46907	10.5604		-0.346487	40.9655
-0.160681	8.49231		0.699153	5.06019		0.467798	71.9426		0.804713	39.8215		-0.9539	27.721		-0.0855972	7.39227
0.54769	45.6297		-0.0179908	39.9095		-0.167543	76.4748		1.2869	13.5085		0.190385	16.1926		1.38145	7.74428
-1.11487	22.7048		0.598255	5.58821		-0.132574	12.6725		-0.34287	5.98422		-0.0174235	10.1644		-0.306539	116.428
0.0715719	6.29223		0.866231	24.3769		1.07309	14.8285		-1.306	10.2524		-0.137472	222.56		1.40976	30.3171
-0.534356	22.6168		1.07543	143.885		0.461469	10.6924		0.457655	29.2171		0.707776	6.73225		-0.553595	33.3092
0.452889	32.5172		0.744726	20.1087		1.4366	5.67621		-0.587631	17.6887		-0.893223	70.2706		0.701069	19.6687
-1.90527	12.1444		-0.864484	38.9414		-1.40102	13.6845		-1.0064	12.3205		-1.38592	8.75632		0.9117	6.90825
0.697084	31.1091		0.235538	12.3205		-0.0144989	15.6646		0.718591	93.4154		0.785234	41.8015		-0.476777	55.574
0.0473194	6.42424		-1.53845	5.80821		-0.643795	5.5002		-0.395848	18.4807		0.0878279	205.312		-0.929504	11.1324
0.610528	41.2735		-1.35335	5.4562		-0.175542	7.87629		-1.59265	17.7767		-0.0911961	5.3682		0.23721	29.7011
0.161534	24.8609		-0.605694	8.49231		1.9321	7.87629		1.00485	6.95226		0.207421	4.97218		0.270411	14.4325
-0.374243	13.9045		0.0285962	11.3964		-1.3735	7.08426		-0.443795	27.061		-0.9294	14.2125		-0.521464	236.289
0.385459	7.17226		0.724619	30.4491		0.655483	29.9211		0.420172	9.98837		-0.0752962	5.63221		-0.776215	27.413
1.01589	13.0685		1.10302	22.3528		0.734984	12.8925		0.676227	18.9647		0.748026	7.04026		-0.668776	9.85636
-0.821244	69.6546		0.382256	38.4574		0.377232	14.0365		-0.797854	13.9045		1.39777	18.1727		-0.11205	7.30427
-0.469044	68.8185		0.150421	33.2212		-1.34945	70.6666		-0.727992	20.2407		-0.440918	19.0087		0.396134	13.4205
0.962047	21.6048		0.720592	24.5529		-1.51331	15.8846		0.531268	36.9614		-0.733182	31.2411		-0.776008	12.8045
-0.775397	6.99626		1.2074	16.3686		0.340735	83.2511		-0.218459	9.24034		0.351168	16.5006		1.17627	9.54835
1.60231	11.0004		-1.47938	8.2283		0.576992	49.1938		0.750103	12.4085		-0.867693	11.8804		-0.802847	13.4205
0.650112	9.32834		-1.15226	5.3242		0.803623	7.48027		-0.844313	6.07222		-0.735445	30.9771		1.12737	34.0133
-0.0461923	5.5002		-0.625492	7.61228		-0.043395	66.0464		-0.988729	17.6887		1.1695	26.533		-0.752378	28.6891
-0.933011	22.0008		0.527457	6.42424		-0.338766	18.5247		0.608528	7.08426		0.184198	11.8804		-0.376617	133.017
1.03841	24.7729		0.398354	60.8982		-0.343245	9.37234		-0.220724	15.0486		0.383256	6.02822		0.724157	5.3682
0.671241	8.71232		0.811226	9.90036		0.824286	7.17226		-0.0956609	5.3242		-0.0416801	10.8244		1.2399	77.0468
1.08494	11.2204		-1.36318	23.8489		0.275268	10.7804		1.12026	6.46824		1.09782	17.2486		-0.745256	17.1166
0.308698	26.049		-1.21893	10.8684		0.698388	47.2137		-0.981031	28.7331		NaN	NaN		1.21413	7.17226
1.25497	8.40431		0.092756	5.19219		1.28165	16.5446		-0.128811	9.10833		-1.16641	5.4562		0.204059	16.9846
0.130364	8.75632		0.746129	7.34827		-0.0541093	28.073		-0.392857	17.5566		-1.42165	25.0809		-0.53826	61.1182
-0.474801	17.9087		0.356892	5.67621		-0.70563	187.887		-0.0989331	6.60024		-1.17308	7.65628		-0.74306	15.2686
0.500021	13.2005		0.671615	8.2283		0.662016	86.8592		0.57442	11.9684		0.235563	5.58821		0.0693331	25.4769
0.361562	7.17226		0.724636	25.8289		0.493438	24.4649		1.37444	8.75632		-1.08215	5.4122		1.60355	7.74428
0.451658	9.50435		-0.486184	8.66832		0.339312	8.40431		-0.29413	14.1245		-0.958702	42.8576		NaN	NaN
-0.103945	15.2246		-1.31896	12.3205		-1.94993	5.72021		-0.24618	7.65628		-0.486782	8.0523		-0.517928	6.90825
0.96455	5.23619		0.542251	9.50435		0.582982	69.8746		-0.637034	11.3964		-1.1164	57.1141		0.649808	25.3889
0.496776	37.2254		-0.0200677	27.809		0.755757	39.0734		-0.161459	7.48027		1.68807	5.3682		-0.758161	44.9257
0.821669	182.431		0.268262	6.16023		0.541702	33.4412		-0.715643	5.76421		-0.759557	29.3491		-1.17178	9.37234
0.710187	10.9564		0.246552	13.2885		0.152862	11.9684		0.59423	30.3611		-0.906643	19.4487		0.848059	14.4325
-0.225369	128.045		0.699153	5.06019		0.48808	34.8053		-0.0392066	74.3627		1.35906	11.3964		1.49253	4.88418
-0.160681	8.49231		-0.0179908	39.9095		-0.274537	6.82025		-1.20477	8.71232		-0.869561	14.0805		1.52328	4.66417
0.54769	45.6297		0.598255	5.58821		1.38006	8.1843		-1.72044	34.4093		-1.0072	7.48027		-1.18971	48.4458
-1.11487	22.7048		0.866231	24.3769		1.51196	8.58032		-0.327897	15.2246		0.803344	6.51224		-0.620471	9.46035
0.0715719	6.29223		1.07543	143.885		1.01101	28.205		-0.667111	6.90825		0.304861	69.6546		-0.465174	62.3063
-0.534356	22.6168		0.744726	20.1087		-0.113355	11.5724		1.00066	46.5977		-0.0848572	22.4408		-0.734576	42.5056
0.452889	32.5172		-0.864484	38.9414		0.513396	65.5184		0.680855	40.8335		0.0861602	9.02033		-1.31613	13.3325
-1.90527	12.1444		0.235538	12.3205		-0.0616398	10.6924		-0.434562	44.8376		-0.536988	6.64424		-0.152699	8.62432
0.697084	31.1091		-1.53845	5.80821		-0.07254	23.4969		0.457528	7.52428		1.10905	72.9547		-1.42814	6.29223
0.0473194	6.42424		-1.35335	5.4562		-1.08788	7.43627		-1.27815	7.92029		0.909478	5.28019		-1.27799	9.76836
0.610528	41.2735		-0.605694	8.49231		0.556059	80.963		1.0209	27.721		0.489461	5.89622		-0.889659	6.55624
0.161534	24.8609		0.0285962	11.3964		0.108543	72.9987		-1.58789	50.3379		-1.23097	11.4404		-1.68606	11.1764
-0.374243	13.9045		0.724619	30.4491		1.07021	12.1884		1.15184	62.7903		0.0277882	79.9069		1.00585	10.3844
0.385459	7.17226		1.10302	22.3528		0.91791	10.4724		-1.55867	10.0324		-0.489346	7.43627		1.01167	8.84433
1.01589	13.0685		0.382256	38.4574		0.563891	19.0967		0.884426	5.85222		1.49333	10.7364		2.33162	6.64424
-0.821244	69.6546		0.150421	33.2212		-1.99985	36.3013		1.54105	9.90036		1.01385	11.3964		-0.285458	60.0182
-0.469044	68.8185		0.720592	24.5529		NaN	NaN		1.33534	42.1095		-0.425831	6.46824		-1.51667	12.1444
0.962047	21.6048		1.2074	16.3686		-0.0820608	46.6857		0.643838	7.61228		-1.20175	19.6687		-0.0610428	21.4728
-0.775397	6.99626		-1.47938	8.2283		-0.479162	16.2366		-0.568398	9.06433		0.483933	6.07222		-0.313279	41.5815
1.60231	11.0004		-1.15226	5.3242		0.0989912	9.98837		-1.25165	38.7214		-0.171213	25.0809		0.919983	11.8804
0.650112	9.32834		-0.625492	7.61228		1.14366	8.66832		-0.482666	5.89622		-0.497716	124.525		1.68836	59.4462
-0.0461923	5.5002		0.527457	6.42424		-0.662095	18.7447		1.17558	110.4		1.09296	50.1618		2.05646	5.72021
-0.933011	22.0008		0.398354	60.8982		1.15481	18.6127		0.901871	20.1087		0.857172	102.48		-2.15881	20.4168
1.03841	24.7729		NaN	NaN		1.54995	6.60024		0.00814636	11.9244		-0.561154	7.30427		1.66531	12.8925
0.671241	8.71232		0.870102	6.95226		-0.631357	6.07222		-0.252447	6.07222		0.0902172	7.78829		0.105624	15.9286
NaN	NaN		0.188534	20.5488		0.714105	15.7966		-0.49801	12.1884		1.13087	19.1847		-1.80743	17.5126
0.832447	25.7849		1.51184	17.8647		-0.282157	33.0892		NaN	NaN		-0.497061	36.3453		0.976726	50.2058
1.21527	12.2765		0.0698962	9.59235		-0.308488	11.9244		-0.836813	19.0527		-0.475892	43.6056		-0.608146	11.4404
0.337697	5.89622		-0.912356	17.5126		-2.06502	49.4578		0.12657	7.48027		NaN	NaN		-1.42115	32.1652
-1.39507	17.1606		0.731697	21.9568		-0.197304	6.64424		-1.12451	5.80821		0.823268	73.1307		-1.19054	14.4325
0.647168	11.0444		-1.50424	6.46824		-0.466722	26.445		-0.897583	9.63635		1.10163	19.8887		0.902126	80.875
-1.15971	9.98837		-0.841284	26.929		-1.64725	33.4852		-1.33294	5.4562		0.92881	23.5849		0.220675	23.8489
1.19702	13.5965		0.130089	7.74428		1.71081	12.6725		-1.44817	11.2644		0.136773	31.4612		-0.702536	11.5284
0.201497	29.4811		1.58998	6.11622		-0.612461	52.7579		-0.70674	17.8207		0.795759	53.066		NaN	NaN
0.580398	14.1685		0.91459	11.2204		-0.0527125	165.05		-0.785793	13.9925		0.241288	10.9124		-0.52364	18.2167
-0.318318	15.7086		0.13398	9.63635		0.170919	5.5442		0.0844065	7.08426		1.15288	10.4724		-0.770102	5.5442
1.17673	6.38023		0.536841	13.2445		-1.56569	9.02033		-1.31123	36.1693		1.01977	75.9908		-0.979237	11.0004
-1.23796	5.76421		-0.181699	17.4686		-0.193942	45.5417		-0.666651	30.4491		-0.952318	5.5442		-0.399025	8.36031
-1.29746	11.5724		-0.999422	13.6405		-0.333251	16.8966		0.945262	26.841		0.519424	7.87629		-0.677447	9.98837
-0.654568	16.4126		1.67902	9.98837		1.55434	22.8808		0.865819	5.19219		0.123604	43.5176		-1.0389	16.7646
-1.22115	12.8925		0.387847	16.1926		-1.30497	37.4454		1.32288	7.21627		-0.514388	11.2204		-0.721672	18.4367
-0.779265	37.1814		0.422933	18.9207		-0.548403	24.5529		-0.779307	5.58821		-0.278647	5.19219		1.36519	13.7725
0.223799	14.9165		1.21502	10.8684		-0.645617	22.2648		1.5009	11.8804		-0.499844	12.2324		0.371019	25.3009
0.209057	11.0004		-0.333741	5.3242		1.34522	10.7364		0.200626	10.6484		-0.414587	32.2972		-0.117155	6.51224
-1.21022	6.82025		-1.24848	9.54835		-0.252066	29.4811		1.10634	16.6766		-0.472842	12.6285		-0.408855	5.67621
0.832447	25.7849		-1.17524	7.56828		1.81638	6.16023		-0.345264	7.17226		-0.739461	9.54835		0.114456	12.7605
1.21527	12.2765		-0.671236	30.8891		1.05001	11.2204		-1.15944	14.4325		-0.974089	7.43627		0.627523	6.02822
0.337697	5.89622		-1.95188	8.53631		0.541917	9.06433		1.35397	17.6887		0.871892	19.2287		0.796501	5.80821
-1.39507	17.1606		0.870102	6.95226		0.596452	11.3524		1.37156	44.3976		0.405304	10.2084		-0.0593588	11.6604
0.647168	11.0444		0.188534	20.5488		0.169825	55.9701		1.21254	21.0328		-0.393396	345.017		-0.412379	5.28019
-1.15971	9.98837		1.51184	17.8647		-1.13272	30.4491		0.432323	14.4325		-0.437762	12.8925		-0.739144	6.99626
1.19702	13.5965		0.0698962	9.59235		NaN	NaN		-0.451294	84.4391		-1.0615	11.0444		-0.182297	33.7492
0.201497	29.4811		-0.912356	17.5126		0.62412	39.2934		1.09656	20.1527		0.871072	9.46035		-0.802668	13.2445
0.580398	14.1685		0.731697	21.9568		0.0667921	37.2694		-0.261104	12.1004		0.562263	6.68825		-0.862166	35.2893
-0.318318	15.7086		-1.50424	6.46824		1.61034	5.76421		1.62835	8.0963		0.931058	12.9805		-1.21643	14.7405
1.17673	6.38023		-0.841284	26.929		0.281893	42.0655		0.624275	5.80821		-0.387194	23.7169		1.18458	17.3806
-1.23796	5.76421		0.130089	7.74428		0.159636	15.8846		-0.914156	23.7169		-0.821516	6.95226		0.728851	6.38023
-1.29746	11.5724		1.58998	6.11622		0.250322	256.441		0.296737	6.60024		-0.41195	78.6309		0.59187	5.80821
-0.654568	16.4126		0.91459	11.2204		-0.223872	15.0046		1.25683	17.3806		-0.758846	26.489		0.253666	9.68036
-1.22115	12.8925		0.13398	9.63635		-1.02647	13.6405		-0.0522591	58.9182		1.08683	17.1606		0.101885	8.0963
-0.779265	37.1814		0.536841	13.2445		0.374774	9.85636		-0.514273	22.6168		0.631123	9.68036		-0.955714	12.2765
0.223799	14.9165		-0.181699	17.4686		-0.48215	17.4686		1.19524	6.29223		0.394786	16.5006		0.0711618	16.3246
0.209057	11.0004		-0.999422	13.6405		-1.33528	19.5367		0.677211	152.994		0.832694	10.9124		-0.133948	60.2822
-1.21022	6.82025		1.67902	9.98837		0.50789	18.2167		0.808736	7.52428		0.500399	5.5002		-0.971939	7.74428
NaN	NaN		0.387847	16.1926		0.442176	76.6948		0.581999	77.0468		0.430924	10.4724		-1.04326	6.64424
-1.09806	11.4844		0.422933	18.9207		0.741866	9.19634		-0.317554	9.85636		-1.12903	24.0689		1.05958	9.19634
0.689919	5.85222		1.21502	10.8684		-0.746758	7.78829		-0.231578	11.9684		-0.926188	6.95226		0.76941	18.0847
1.1084	5.98422		-0.333741	5.3242		-1.18416	14.1245		-0.903028	20.9448		0.986414	9.19634		0.0538362	4.97218
-0.544291	9.02033		-1.24848	9.54835		-0.223324	6.07222		-1.25078	9.10833		-0.0652606	13.9925		-0.000594527	5.76421
-0.461223	7.21627		-1.17524	7.56828		-0.112534	47.2577		0.0776971	7.30427		1.05847	20.3287		-0.199468	6.46824
-0.74673	6.42424		-0.671236	30.8891		0.35356	27.765		1.41014	6.24823		0.0852311	5.76421		0.889164	5.76421
-0.515793	11.3084		-1.95188	8.53631		-0.227574	63.8463		-0.75464	5.5442		-0.0730139	6.38023		1.35099	31.8572
1.11828	6.95226		NaN	NaN		-0.403986	9.50435		0.980791	6.29223		0.48782	5.58821		0.114844	5.01618
-0.942903	30.8011		0.456575	98.6076		1.04535	5.85222		0.356364	7.96429		1.20876	14.3445		-0.0370127	8.66832
0.915446	15.4886		-0.134418	21.8248		0.402334	8.66832		-0.0778256	8.40431		-0.605236	9.19634		-0.678949	17.9087
-0.928444	5.14819		0.271725	18.9647		0.136351	21.4728		-1.1522	81.007		-0.0129917	14.5205		1.22003	11.3524
-0.72584	5.98422		0.965994	33.7932		-0.846696	6.46824		1.25111	9.37234		-0.417005	8.31631		-1.3912	8.93233
-0.383454	6.42424		1.28057	45.8937		0.491614	152.026		0.308536	38.7214		-0.532032	7.34827		1.29041	4.62017
-0.384797	26.753		0.937448	13.7725		-0.0334876	5.5002		0.60103	18.1287		-1.06587	12.6285		-0.848779	6.16023
0.806892	10.4284		0.69565	36.0373		-0.197352	12.8925		-0.257661	30.0531		1.2305	13.3325		0.115315	20.2407
1.03605	5.80821		0.114658	56.0141		0.268055	28.6451		-1.2944	7.52428		0.903487	31.4172		-0.646803	99.3117
1.14391	5.63221		0.508018	8.0523		0.77119	40.3495		0.949724	10.5164		0.192793	6.95226		-0.149124	16.1486
-1.05433	6.07222		-0.134191	23.4089		0.799743	60.3262		-1.18703	7.74428		0.0163595	38.2814		-0.548212	31.0211
-0.080393	6.38023		-0.0643019	24.0249		0.930645	12.3645		NaN	NaN		0.839418	5.10419		-0.481656	5.5002
0.671297	9.59235		-0.225409	214.244		0.41729	157.922		-0.423952	53.594		0.76125	8.97633		-0.647148	47.4777
-0.190435	5.89622		-0.661556	15.4886		0.301031	77.8829		-0.24081	33.6172		-0.606824	13.4645		-0.721291	16.2366
-0.119676	8.88833		1.29709	41.4055		0.384242	57.5101		0.0510695	332.52		1.14269	53.682		-0.869131	62.2623
0.0496478	19.0967		1.44559	12.1004		-0.191567	25.961		0.157808	12.4965		1.1878	8.36031		-0.782088	19.0527
0.2572	7.56828		-0.245808	8.88833		-1.09273	6.20423		-0.423314	20.5048		0.166792	7.83229		-0.859271	7.21627
-0.892004	23.0568		-0.458372	69.3906		-0.0212279	16.9846		0.463912	55.398		0.11139	10.0324		-1.1287	7.61228
-0.298504	112.16		0.346446	16.8086		0.229965	42.3736		0.609534	11.7924		-0.830939	19.0527		1.19912	5.28019
-0.951048	70.0066		0.102958	24.2009		-0.84228	10.6484		0.18228	11.0444		0.85474	29.0411		0.548786	24.4649
-0.416656	11.7484		0.600229	420.875		0.157399	24.2889		-0.380212	7.30427		0.821955	6.55624		0.198678	8.71232
0.480482	18.3927		0.246254	13.4205		1.32238	6.46824		0.846304	34.0573		-0.520124	32.6052		-0.237946	10.7804
0.545711	7.39227		1.12952	15.1806		0.697575	18.3927		0.0370294	6.16023		0.476264	13.1125		-0.180494	10.9124
0.627655	7.30427		-0.522067	12.6725		-0.502628	4.92818		-1.04226	15.5766		-0.176392	6.55624		-1.14085	8.84433
0.949994	21.9128		0.155468	5.94022		0.93061	15.7526		-0.0843052	17.4246		-0.329208	4.92818		-0.469572	10.5604
-1.02884	20.3287		1.46302	9.46035		1.00394	9.81236		-0.0397759	6.16023		0.431043	5.01618		-0.560164	134.733
-0.984512	7.08426		0.0815161	11.7484		-0.009235	11.6164		-0.465776	11.0004		0.117728	10.0764		-0.0241581	34.9813
-0.616825	14.4325		-0.0381652	27.193		-1.38177	24.0249		0.334148	54.21		0.949202	37.4894		1.22301	28.161
0.543324	6.86425		-0.363338	5.5002		0.882101	12.7165		0.189519	27.853		1.07699	28.381		1.05574	5.80821
-0.751923	8.44831		-0.323021	7.26027		0.61947	23.9809		0.777343	81.535		0.559063	7.26027		0.187436	14.8725
-0.175599	6.11622		-0.813058	5.89622		0.620532	17.4246		0.426802	6.82025		-0.704852	82.723		-0.255463	7.56828
-0.10958	18.3487		-0.249991	5.80821		-0.238117	10.8684		1.39754	6.11622		-0.699798	11.1764		-0.317827	6.60024
-1.19375	8.1403		0.858155	138.781		-0.196011	17.1606		0.507614	80.259		1.22898	20.7688		-0.38165	7.26027
-0.50161	5.72021		1.44315	5.10419		-0.0720305	7.56828		-0.128887	13.0245		0.509227	6.86425		-0.388808	10.9124
-0.330597	5.94022		0.0818602	7.74428		-0.906625	27.281		0.156911	79.9509		0.37558	6.16023		-0.737701	12.7165
-0.654511	36.7414		0.881262	176.798		0.0682288	17.9527		-0.616043	46.1137		-0.055673	6.86425		-0.389426	14.7845
0.06206	13.3325		0.714749	28.557		0.876938	11.0884		-0.883938	8.84433		1.16604	30.6251		-0.384902	11.2204
-0.29978	21.9128		0.716738	8.66832		0.619467	7.04026		-0.247917	19.0527		-0.83739	8.53631		-0.930484	28.8651
-1.0115	12.1004		-0.675021	10.7804		0.295143	5.63221		0.836721	189.119		0.897004	8.1843		-1.27098	5.4122
-1.02699	4.97218		0.146903	209.712		-0.182449	16.4566		1.23232	6.38023		-1.56866	5.76421		-0.430319	9.02033
0.0770604	12.3645		0.690512	14.0805		0.798441	51.9659		0.249189	20.5928		-1.21528	35.5973		-0.557628	12.6725
0.103244	8.40431		-0.32448	5.28019		0.565738	10.2964		-0.655253	34.5413		0.40732	8.93233		0.190648	14.1245
0.219452	28.6451		-0.72328	5.5442		0.0934575	10.3844		-0.777033	6.55624		0.425273	47.4777		1.59887	6.38023
-1.08753	6.42424		0.539561	13.6845		0.605747	43.7816		-0.559366	8.00829		0.588894	10.5164		1.34625	11.4404
1.07306	5.94022		0.228895	5.98422		-0.930026	71.0186		-0.198944	8.31631		0.802225	29.3931		0.276491	10.6484
-1.30236	9.85636		-0.654601	29.0411		-0.233581	11.5284		-0.384279	5.4562		-1.16802	79.5989		-0.082393	7.83229
-0.481407	6.42424		1.23641	59.5342		0.212227	17.2046		-1.0864	8.2283		-0.4025	29.9211		-0.430037	9.19634
0.76743	5.89622		0.624807	12.5405		-0.526563	9.19634		-1.23098	14.2125		0.366111	6.02822		-0.574041	7.04026
-0.407843	37.9294		0.371237	8.88833		-0.506684	43.0336		0.7731	18.1287		0.612036	12.1004		-0.478296	33.7932
0.0974654	6.11622		0.371282	54.562		0.863719	28.425		0.622521	8.0963		0.264384	5.80821		0.0279124	40.8775
-0.523925	7.52428		0.456575	98.6076		0.770811	13.9485		-0.0228233	21.2968		0.622358	20.7248		0.266206	6.07222
0.740552	17.8207		-0.134418	21.8248		1.3606	5.19219		-0.368399	6.20423		-1.31478	17.3366		-0.807667	9.06433
-0.905552	137.417		0.271725	18.9647		0.633455	11.3524		0.878008	21.7368		0.585452	6.82025		-1.03784	20.6808
-0.758062	17.6446		0.965994	33.7932		-0.109482	11.4844		0.156616	14.9605		1.03022	11.7044		-1.40389	11.6604
-0.865578	9.28434		1.28057	45.8937		-0.328845	7.87629		-1.39253	7.12826		0.701429	5.85222		0.255327	6.60024
-0.837432	9.63635		0.937448	13.7725		0.980636	30.7131		-0.381366	44.0896		1.16861	12.1004		0.421284	12.5845
-0.362114	6.16023		0.69565	36.0373		1.00014	20.6368		0.0543311	10.3404		-1.13804	8.53631		-0.599516	24.6849
1.082	12.1004		0.114658	56.0141		0.540086	5.58821		-0.218524	7.17226		-0.995255	8.53631		-1.32528	22.5288
-0.415762	16.4566		0.508018	8.0523		0.329944	5.5442		0.806064	6.64424		-1.23694	8.0963		-0.526357	39.0294
-1.00327	22.4848		-0.134191	23.4089		0.716223	5.14819		0.775496	175.302		0.83374	5.76421		-1.35061	15.4446
-0.878549	23.3649		-0.0643019	24.0249		0.711562	18.5247		0.451216	6.64424		0.426425	15.0046		0.759861	19.1847
0.737319	5.10419		-0.225409	214.244		-0.246916	57.9061		0.111696	28.117		1.25963	6.99626		-0.579797	7.04026
-0.369743	33.3532		-0.661556	15.4886		-0.644319	18.5687		-0.137864	37.5774		-0.489282	14.9165		-1.10941	15.7086
-0.353297	15.3126		1.29709	41.4055		1.17955	46.2457		1.22015	5.01618		-0.921275	61.9543		0.205993	113.348
-0.373348	15.8406		1.44559	12.1004		0.403908	7.43627		0.761264	9.59235		-0.732346	5.3242		-0.279679	8.1403
0.576794	9.15234		-0.245808	8.88833		0.200586	29.4811		-0.124798	12.6725		1.12971	10.2084		0.665715	6.51224
0.739788	8.84433		-0.458372	69.3906		0.76751	14.7845		0.0391843	11.7484		-1.3106	96.1435		-0.350548	6.90825
1.02538	6.73225		0.346446	16.8086		-0.798526	30.0091		-0.386752	16.7206		-0.403688	10.1644		-0.674806	13.9045
-0.296144	8.2723		0.102958	24.2009		0.696617	11.1764		-0.9165	7.17226					-1.97075	9.76836
-0.948741	27.985		0.600229	420.875		1.27124	6.16023		0.809264	58.2141					-1.71977	16.3246
-0.389389	6.24823		0.246254	13.4205		0.21842	78.9389		-0.699584	33.6172					-1.57375	11.0884
0.0157244	12.8485		1.12952	15.1806		0.968257	20.5928		0.673171	107.32					-1.47043	13.3325
-0.0507336	5.58821		-0.522067	12.6725		-0.59656	8.0523		0.142984	6.29223					-1.25466	17.0726
-0.0349774	6.99626		0.155468	5.94022		0.0907361	7.43627		0.756151	19.0967					-1.11966	8.36031
0.140495	8.93233		1.46302	9.46035		0.474369	14.9605		1.16209	5.4122					-0.136175	154.534
0.216761	9.06433		0.0815161	11.7484		0.834706	10.5604		0.115928	6.77625					-0.576658	16.1046
0.28151	6.90825		-0.0381652	27.193		0.933295	10.2524		-0.180438	34.0573					-0.521342	5.94022
-0.0892772	12.8485		-0.363338	5.5002		0.860864	20.9448		-1.06664	7.17226					-0.426851	29.0851
0.56329	8.40431		-0.323021	7.26027		0.361774	41.3175		0.4139	10.7364					0.0155594	13.7725
-0.602764	109.784		-0.813058	5.89622		-1.67517	5.4122		-0.318662	7.61228					0.149996	7.48027
-0.082328	10.3844		-0.249991	5.80821		-0.495679	11.4404		-0.22253	51.4819					0.297243	13.8165
0.979759	12.8925		0.858155	138.781		0.148869	5.19219		0.891908	10.2084					0.352927	4.97218
-1.09806	11.4844		1.44315	5.10419		0.314389	110.796		0.917617	14.4325					0.573519	14.6085
0.689919	5.85222		0.0818602	7.74428		1.03215	32.6052		0.331763	8.31631					0.798417	41.5815
1.1084	5.98422		0.881262	176.798		1.06174	16.2806		-0.502	18.7007					0.684208	8.0963
-0.544291	9.02033		0.714749	28.557		1.16515	24.2009		-0.617707	24.5089					0.811778	12.5845
-0.461223	7.21627		0.716738	8.66832		0.389714	5.76421		1.06455	7.92029					1.19409	13.0685
-0.74673	6.42424		-0.675021	10.7804		0.204487	10.7364		0.479886	31.1531					1.0026	8.93233
-0.515793	11.3084		0.146903	209.712		0.310146	11.4404		-0.030047	5.28019					1.26966	62.7023
1.11828	6.95226		0.690512	14.0805		-1.51761	10.4284		-0.823867	42.5496					1.37107	5.5002
-0.942903	30.8011		-0.32448	5.28019		-1.16957	11.8804		1.04343	10.4284					0.358492	8.2723
0.915446	15.4886		-0.72328	5.5442		0.126193	8.62432		0.535009	12.1004					0.647776	42.1095
-0.928444	5.14819		0.539561	13.6845		0.388389	10.3844		0.206353	6.51224					0.341783	6.77625
-0.72584	5.98422		0.228895	5.98422		1.00263	20.8128		0.998581	5.85222					0.268815	6.38023
-0.383454	6.42424		-0.654601	29.0411		-0.755238	8.58032		0.458183	11.5724					0.637591	26.357
-0.384797	26.753		1.23641	59.5342		0.49338	17.5126		0.264898	10.0764					0.11856	29.1731
0.806892	10.4284		0.624807	12.5405		0.932909	16.1926		-0.552241	30.6691					0.381889	18.1287
1.03605	5.80821		0.371237	8.88833		-0.498005	5.98422		-0.873801	6.29223					0.501372	19.8447
1.14391	5.63221		0.371282	54.562		0.328604	13.0245		1.0967	15.1806					0.889135	30.3171
-1.05433	6.07222					0.273586	8.93233		0.40029	17.1166					1.31392	5.06019
-0.080393	6.38023					-0.0306427	20.7688		0.153786	6.82025					0.621771	13.0685
0.671297	9.59235					0.292668	13.7285		0.645307	33.7052					-0.653874	43.4296
-0.190435	5.89622					0.173132	68.7745		0.627031	7.48027					-0.694771	19.1407
-0.119676	8.88833					-0.516703	5.94022		0.190456	34.4973					0.0907595	17.7327
0.0496478	19.0967					0.368678	11.6604		-0.378477	10.0324					1.21178	12.5845
0.2572	7.56828					1.11807	12.7165		0.378923	7.12826					0.245215	8.49231
-0.892004	23.0568					-0.835366	8.75632		0.925924	9.15234					-0.106594	20.0647
-0.298504	112.16					0.923711	6.68825		-1.00049	72.6027					-1.39704	36.2573
-0.951048	70.0066					0.860189	12.7165		-0.193014	20.8568					-1.16694	5.89622
-0.416656	11.7484					-0.550258	100.852		0.882013	16.3686					0.359249	7.17226
0.480482	18.3927					-0.215696	15.3566		-1.79245	5.19219					0.75968	6.07222
0.545711	7.39227					0.261581	13.9485		1.05632	5.4122					0.803249	6.68825
0.627655	7.30427					0.391104	18.9207		-1.11091	7.17226					-0.0305227	8.93233
0.949994	21.9128					0.987129	27.061		0.507668	6.55624					0.934648	8.0963
-1.02884	20.3287					-0.263954	6.77625		0.472736	12.5845					-0.549013	7.17226
-0.984512	7.08426					0.677791	39.5575		0.854391	21.6488					-1.09484	10.5604
-0.616825	14.4325					0.83427	69.0385		0.516805	6.38023					-0.181816	10.7364
0.543324	6.86425					0.753123	67.1465		-1.24215	7.39227					1.127	101.776
-0.751923	8.44831					1.02758	33.5732		0.324891	9.02033					0.988265	6.64424
-0.175599	6.11622					-0.229127	11.6604		0.617975	17.4246					0.495253	39.2054
-0.10958	18.3487					-0.235957	8.44831		0.786354	7.65628					0.764543	8.31631
-1.19375	8.1403					1.04181	5.58821		1.10165	7.17226
-0.50161	5.72021					-1.34593	7.87629		1.16186	7.52428
-0.330597	5.94022					-0.964739	17.5126		0.795167	50.6899
-0.654511	36.7414					0.0399921	15.0046		0.285864	67.8945
0.06206	13.3325					0.076322	9.68036		-0.0686786	24.7289
-0.29978	21.9128					0.301989	23.6289		0.839171	47.3457
-1.0115	12.1004					0.838362	23.9809		0.000160623	5.76421
-1.02699	4.97218					-0.963974	30.8891		0.787595	43.4736
0.0770604	12.3645					-0.862524	27.589		1.0036	10.2964
0.103244	8.40431					-0.672887	28.6891		0.847724	49.6778
0.219452	28.6451					0.0527363	16.3686		-0.125387	21.3408
-1.08753	6.42424					0.255004	12.6285		0.370986	39.9095
1.07306	5.94022					0.5913	131.697		0.741891	22.3528
-1.30236	9.85636					1.20425	14.6965		0.577933	27.413
-0.481407	6.42424					-0.411993	14.6085		-0.424422	6.82025
0.76743	5.89622					0.443611	19.3607		-0.68847	15.3566
-0.407843	37.9294					0.884974	23.8929		-0.81526	6.68825
0.0974654	6.11622					0.592629	8.58032		0.74672	18.3047
-0.523925	7.52428					0.709674	34.6733		0.825918	17.2486
0.740552	17.8207					-0.281667	26.929		0.955327	10.3404
-0.905552	137.417					-0.458516	6.77625		-0.900066	6.51224
-0.758062	17.6446					0.423436	5.5442		-1.48797	29.4811
-0.865578	9.28434					-0.774073	20.3287		-0.281059	25.1689
-0.837432	9.63635					-0.666589	6.24823		0.485532	13.3325
-0.362114	6.16023					0.949933	14.3005		-0.784119	76.3868
1.082	12.1004					1.03437	21.4288		-1.00801	45.7617
-0.415762	16.4566								-1.62749	5.63221
-1.00327	22.4848								0.375201	14.9165
-0.878549	23.3649								0.891216	5.98422
0.737319	5.10419								1.00381	12.9365
-0.369743	33.3532								-0.102102	6.90825
-0.353297	15.3126
-0.373348	15.8406
0.576794	9.15234
0.739788	8.84433
1.02538	6.73225
-0.296144	8.2723
-0.948741	27.985
-0.389389	6.24823
0.0157244	12.8485
-0.0507336	5.58821
-0.0349774	6.99626
0.140495	8.93233
0.216761	9.06433
0.28151	6.90825
-0.0892772	12.8485
0.56329	8.40431
-0.602764	109.784
-0.082328	10.3844
0.979759	12.8925
